# Supplementary material for: Inhibition of the mTOR pathway and reprogramming of protein synthesis by MDM4 reduce ovarian cancer metastatic properties
Source: PubMed Central journal article supplement (PMC8164635; doi:10.1038/s41419-021-03828-z), 2021-05-29
Supplement: 41419_2021_3828_MOESM1_ESM.pdf [file 41419_2021_3828_MOESM1_ESM.pdf]

**Table S1. MDM4-SK-OV-3 vs Empty Vector-SK-OV-3 MCTSs**

Accession \* Unique protein sequence identifier according to UniProtKB/Swiss-Prot Protein Knowledgebase, release 2011\_06 of 31-May-11.

PLGS Score<sup>§</sup> ProteinLynx Global Server score.

MDM4/EMPTY Ratio<sup>§§</sup> Ratio of expression between the two experimental groups. An arbitrary ratio value of 10 or 0.1 is attributed to a protein found “highly represented” in the numerator (MDM4) or in the denominator (Empty) of the fraction, respectively.

| Accession * | Description                                                                       | PLGS Score <sup>§</sup> | MDM4/E<br>MPTY<br>Ratio <sup>§§</sup> |
|-------------|-----------------------------------------------------------------------------------|-------------------------|---------------------------------------|
| 1 Q59GN2    | R39L5_HUMAN Putative 60S ribosomal protein L39-like 5 OS=Homo sapiens OX=9606     | 1654,71                 | 10                                    |
| 2 O00410    | IPO5_HUMAN Importin-5 OS=Homo sapiens OX=9606 GN=IPO5 PE=1 SV=4                   | 251,59                  | 10                                    |
| 3 Q5XKP0    | MIC13_HUMAN MICOS complex subunit MIC13 OS=Homo sapiens OX=9606 GN=MIC1           | 146,18                  | 10                                    |
| 4 Q03468    | ERCC6_HUMAN DNA excision repair protein ERCC-6 OS=Homo sapiens OX=9606 GN=E       | 209,71                  | 10                                    |
| 5 Q96HC4    | PDLI5_HUMAN PDZ and LIM domain protein 5 OS=Homo sapiens OX=9606 GN=PDLIM         | 448,58                  | 10                                    |
| 6 P31689    | DNJA1_HUMAN DnaJ homolog subfamily A member 1 OS=Homo sapiens OX=9606 GN          | 251,81                  | 10                                    |
| 7 P0C7P4    | UCRIL_HUMAN Putative cytochrome b-c1 complex subunit Rieske-like protein 1 OS=H   | 182,55                  | 10                                    |
| 8 O43765    | SGTA_HUMAN Small glutamine-rich tetratricopeptide repeat-containing protein alpha | 261,98                  | 10                                    |
| 9 Q9UBQ7    | GRHPR_HUMAN Glyoxylate reductase/hydroxypyruvate reductase OS=Homo sapiens (      | 306,68                  | 10                                    |
| 10 Q9Y3F4   | STRAP_HUMAN Serine-threonine kinase receptor-associated protein OS=Homo sapier    | 259,59                  | 10                                    |
| 11 Q13510   | ASAH1_HUMAN Acid ceramidase OS=Homo sapiens OX=9606 GN=ASAH1 PE=1 SV=5            | 245,21                  | 10                                    |
| 12 P67870   | CSK2B_HUMAN Casein kinase II subunit beta OS=Homo sapiens OX=9606 GN=CSNK2B       | 231,9                   | 10                                    |
| 13 Q13506   | NAB1_HUMAN NGFI-A-binding protein 1 OS=Homo sapiens OX=9606 GN=NAB1 PE=1 !        | 280,5                   | 10                                    |
| 14 Q13501   | SQSTM_HUMAN Sequestosome-1 OS=Homo sapiens OX=9606 GN=SQSTM1 PE=1 SV=:            | 185,13                  | 10                                    |
| 15 O43747   | AP1G1_HUMAN AP-1 complex subunit gamma-1 OS=Homo sapiens OX=9606 GN=AP1           | 243,13                  | 10                                    |
| 16 Q96DY7   | MTBP_HUMAN Mdm2-binding protein OS=Homo sapiens OX=9606 GN=MTBP PE=1 SV           | 458,47                  | 10                                    |
| 17 P11171   | 41_HUMAN Protein 4.1 OS=Homo sapiens OX=9606 GN=EPB41 PE=1 SV=4                   | 256,23                  | 10                                    |
| 18 P55263   | ADK_HUMAN Adenosine kinase OS=Homo sapiens OX=9606 GN=ADK PE=1 SV=2               | 197,28                  | 10                                    |
| 19 Q12774   | ARHG5_HUMAN Rho guanine nucleotide exchange factor 5 OS=Homo sapiens OX=960       | 282,33                  | 10                                    |

|    |        |                                                                                   |        |    |
|----|--------|-----------------------------------------------------------------------------------|--------|----|
| 20 | O15360 | FANCA_HUMAN Fanconi anemia group A protein OS=Homo sapiens OX=9606 GN=FAN         | 109,34 | 10 |
| 21 | Q5JQF8 | PAP1M_HUMAN Polyadenylate-binding protein 1-like 2 OS=Homo sapiens OX=9606 G      | 464,79 | 10 |
| 22 | Q99865 | SPI2A_HUMAN Spindlin-2A OS=Homo sapiens OX=9606 GN=SPIN2A PE=1 SV=3               | 259,05 | 10 |
| 23 | Q6RW13 | ATRAP_HUMAN Type-1 angiotensin II receptor-associated protein OS=Homo sapiens C   | 218,47 | 10 |
| 24 | P11166 | GTR1_HUMAN Solute carrier family 2_ facilitated glucose transporter member 1 OS=H | 313,21 | 10 |
| 25 | Q6P1N0 | C2D1A_HUMAN Coiled-coil and C2 domain-containing protein 1A OS=Homo sapiens O     | 252,1  | 10 |
| 26 | Q5PSV4 | BRM1L_HUMAN Breast cancer metastasis-suppressor 1-like protein OS=Homo sapiens    | 162,04 | 10 |
| 27 | Q9BYZ2 | LDH6B_HUMAN L-lactate dehydrogenase A-like 6B OS=Homo sapiens OX=9606 GN=LC       | 423,71 | 10 |
| 28 | Q8TCY9 | URGCP_HUMAN Up-regulator of cell proliferation OS=Homo sapiens OX=9606 GN=UR      | 287,35 | 10 |
| 29 | Q9Y3C6 | PPIL1_HUMAN Peptidyl-prolyl cis-trans isomerase-like 1 OS=Homo sapiens OX=9606 G  | 206,97 | 10 |
| 30 | O15347 | HMGB3_HUMAN High mobility group protein B3 OS=Homo sapiens OX=9606 GN=HM          | 246,22 | 10 |
| 31 | O94979 | SC31A_HUMAN Protein transport protein Sec31A OS=Homo sapiens OX=9606 GN=SEC       | 188,32 | 10 |
| 32 | Q9Y3B4 | SF3B6_HUMAN Splicing factor 3B subunit 6 OS=Homo sapiens OX=9606 GN=SF3B6 PE:     | 307,65 | 10 |
| 33 | Q9Y3B3 | TMED7_HUMAN Transmembrane emp24 domain-containing protein 7 OS=Homo sapi          | 182,16 | 10 |
| 34 | O43716 | GATC_HUMAN Glutamyl-tRNA(Gln) amidotransferase subunit C_ mitochondrial OS=Hc     | 577,64 | 10 |
| 35 | Q14919 | NC2A_HUMAN Dr1-associated corepressor OS=Homo sapiens OX=9606 GN=DRAP1 PE         | 189,1  | 10 |
| 36 | Q9UHX1 | PUF60_HUMAN Poly(U)-binding-splicing factor PUF60 OS=Homo sapiens OX=9606 GN      | 252,22 | 10 |
| 37 | Q10567 | AP1B1_HUMAN AP-1 complex subunit beta-1 OS=Homo sapiens OX=9606 GN=AP1B1          | 245,27 | 10 |
| 38 | P11498 | PYC_HUMAN Pyruvate carboxylase_ mitochondrial OS=Homo sapiens OX=9606 GN=PC       | 178,37 | 10 |
| 39 | Q7KZF4 | SND1_HUMAN Staphylococcal nuclease domain-containing protein 1 OS=Homo sapier     | 431,78 | 10 |
| 40 | P29017 | CD1C_HUMAN T-cell surface glycoprotein CD1c OS=Homo sapiens OX=9606 GN=CD1C       | 245    | 10 |
| 41 | Q9NNZ3 | DNJC4_HUMAN DnaJ homolog subfamily C member 4 OS=Homo sapiens OX=9606 GN:         | 684,28 | 10 |
| 42 | P29373 | RABP2_HUMAN Cellular retinoic acid-binding protein 2 OS=Homo sapiens OX=9606 GI   | 178,05 | 10 |
| 43 | P29372 | 3MG_HUMAN DNA-3-methyladenine glycosylase OS=Homo sapiens OX=9606 GN=MP           | 212,29 | 10 |
| 44 | Q1L5Z9 | LONF2_HUMAN LON peptidase N-terminal domain and RING finger protein 2 OS=Horr     | 112,99 | 10 |
| 45 | P30520 | PURA2_HUMAN Adenylosuccinate synthetase isozyme 2 OS=Homo sapiens OX=9606 C       | 234,48 | 10 |
| 46 | Q96NG3 | TTC25_HUMAN Tetratricopeptide repeat protein 25 OS=Homo sapiens OX=9606 GN=1      | 310,79 | 10 |
| 47 | Q9UHV9 | PFD2_HUMAN Prefoldin subunit 2 OS=Homo sapiens OX=9606 GN=PFDN2 PE=1 SV=1         | 777,24 | 10 |
| 48 | O14579 | COPE_HUMAN Coatomer subunit epsilon OS=Homo sapiens OX=9606 GN=COPE PE=1          | 267,25 | 10 |
| 49 | Q8N4J0 | CARME_HUMAN Carnosine N-methyltransferase OS=Homo sapiens OX=9606 GN=CAR          | 239,74 | 10 |
| 50 | Q96E39 | RMXL1_HUMAN RNA binding motif protein_ X-linked-like-1 OS=Homo sapiens OX=96C     | 258,79 | 10 |

|    |            |                                                                                                                          |        |    |
|----|------------|--------------------------------------------------------------------------------------------------------------------------|--------|----|
| 51 | Q96GX2     | A7L3B_HUMAN Ataxin-7-like protein 3B OS=Homo sapiens OX=9606 GN=ATXN7L3B PE=1 SV=1                                       | 310,09 | 10 |
| 52 | O75525     | KHDR3_HUMAN KH domain-containing_ RNA-binding_ signal transduction-associated OS=Homo sapiens OX=9606 GN=KHDR3 PE=1 SV=1 | 222,72 | 10 |
| 53 | O75884     | RBBP9_HUMAN Putative hydrolase RBBP9 OS=Homo sapiens OX=9606 GN=RBBP9 PE=1 SV=1                                          | 481    | 10 |
| 54 | P07910     | HNRPC_HUMAN Heterogeneous nuclear ribonucleoproteins C1/C2 OS=Homo sapiens OX=9606 GN=HNRPC PE=1 SV=1                    | 346,48 | 10 |
| 55 | O94921     | CDK14_HUMAN Cyclin-dependent kinase 14 OS=Homo sapiens OX=9606 GN=CDK14 PE=1 SV=1                                        | 84,84  | 10 |
| 56 | A0A1B0GUJ8 | PNM8C_HUMAN Paraneoplastic antigen-like protein 8C OS=Homo sapiens OX=9606 GN=PNM8C PE=1 SV=1                            | 315,51 | 10 |
| 57 | Q9UKY7     | CDV3_HUMAN Protein CDV3 homolog OS=Homo sapiens OX=9606 GN=CDV3 PE=1 SV=1                                                | 302,03 | 10 |
| 58 | Q96E14     | RMI2_HUMAN RecQ-mediated genome instability protein 2 OS=Homo sapiens OX=9606 GN=RMI2 PE=1 SV=1                          | 226,1  | 10 |
| 59 | Q96AJ1     | CLUA1_HUMAN Clusterin-associated protein 1 OS=Homo sapiens OX=9606 GN=CLUA1 PE=1 SV=1                                    | 280,5  | 10 |
| 60 | P48729     | KC1A_HUMAN Casein kinase I isoform alpha OS=Homo sapiens OX=9606 GN=CSNK1A1A PE=1 SV=1                                   | 386,94 | 10 |
| 61 | Q9Y2Z4     | SYYM_HUMAN Tyrosine--tRNA ligase_ mitochondrial OS=Homo sapiens OX=9606 GN=SYYM PE=1 SV=1                                | 349,66 | 10 |
| 62 | O94905     | ERLN2_HUMAN Erlin-2 OS=Homo sapiens OX=9606 GN=ERLN2 PE=1 SV=1                                                           | 234,68 | 10 |
| 63 | Q9BSE5     | SPEB_HUMAN Agmatinase_ mitochondrial OS=Homo sapiens OX=9606 GN=AGMAT PE=1 SV=1                                          | 224,56 | 10 |
| 64 | P55884     | EIF3B_HUMAN Eukaryotic translation initiation factor 3 subunit B OS=Homo sapiens OX=9606 GN=EIF3B PE=1 SV=1              | 468,82 | 10 |
| 65 | Q9UBE0     | SAE1_HUMAN SUMO-activating enzyme subunit 1 OS=Homo sapiens OX=9606 GN=SAE1 PE=1 SV=1                                    | 283,21 | 10 |
| 66 | P47985     | UCRI_HUMAN Cytochrome b-c1 complex subunit Rieske_ mitochondrial OS=Homo sapiens OX=9606 GN=UCRI PE=1 SV=1               | 182,55 | 10 |
| 67 | Q86T23     | CROL1_HUMAN Putative ciliary rootlet coiled-coil protein-like 1 protein OS=Homo sapiens OX=9606 GN=CROL1 PE=1 SV=1       | 227,33 | 10 |
| 68 | O14529     | CUX2_HUMAN Homeobox protein cut-like 2 OS=Homo sapiens OX=9606 GN=CUX2 PE=1 SV=1                                         | 103,7  | 10 |
| 69 | O75843     | AP1G2_HUMAN AP-1 complex subunit gamma-like 2 OS=Homo sapiens OX=9606 GN=AP1G2 PE=1 SV=1                                 | 200,5  | 10 |
| 70 | Q9NXF1     | TEX10_HUMAN Testis-expressed protein 10 OS=Homo sapiens OX=9606 GN=TEX10 PE=1 SV=1                                       | 407,69 | 10 |
| 71 | Q15046     | SYK_HUMAN Lysine--tRNA ligase OS=Homo sapiens OX=9606 GN=KARS PE=1 SV=3                                                  | 271,18 | 10 |
| 72 | Q6NUP7     | PP4R4_HUMAN Serine/threonine-protein phosphatase 4 regulatory subunit 4 OS=Homo sapiens OX=9606 GN=PP4R4 PE=1 SV=1       | 245,06 | 10 |
| 73 | P20749     | BCL3_HUMAN B-cell lymphoma 3 protein OS=Homo sapiens OX=9606 GN=BCL3 PE=1 SV=1                                           | 274,72 | 10 |
| 74 | Q15393     | SF3B3_HUMAN Splicing factor 3B subunit 3 OS=Homo sapiens OX=9606 GN=SF3B3 PE=1 SV=1                                      | 250,5  | 10 |
| 75 | Q92499     | DDX1_HUMAN ATP-dependent RNA helicase DDX1 OS=Homo sapiens OX=9606 GN=DDX1 PE=1 SV=1                                     | 396,55 | 10 |
| 76 | Q9BYN0     | SRXN1_HUMAN Sulfiredoxin-1 OS=Homo sapiens OX=9606 GN=SRXN1 PE=1 SV=2                                                    | 327,84 | 10 |
| 77 | Q8N4C6     | NIN_HUMAN Ninein OS=Homo sapiens OX=9606 GN=NIN PE=1 SV=4                                                                | 326,61 | 10 |
| 78 | Q16478     | GRIK5_HUMAN Glutamate receptor ionotropic_ kainate 5 OS=Homo sapiens OX=9606 GN=GRIK5 PE=1 SV=1                          | 223,72 | 10 |
| 79 | Q9HBM1     | SPC25_HUMAN Kinetochores protein Spc25 OS=Homo sapiens OX=9606 GN=SPC25 PE=1 SV=1                                        | 227,46 | 10 |
| 80 | Q9Y376     | CAB39_HUMAN Calcium-binding protein 39 OS=Homo sapiens OX=9606 GN=CAB39 PE=1 SV=1                                        | 199,18 | 10 |
| 81 | Q9UNZ2     | NSF1C_HUMAN NSFL1 cofactor p47 OS=Homo sapiens OX=9606 GN=NSFL1C PE=1 SV=1                                               | 313,01 | 10 |

|     |            |                                                                                  |        |    |
|-----|------------|----------------------------------------------------------------------------------|--------|----|
| 82  | Q9H2M9     | RBGPR_HUMAN Rab3 GTPase-activating protein non-catalytic subunit OS=Homo sapiens | 339,31 | 10 |
| 83  | L0R819     | ASURF_HUMAN ASNSD1 upstream open reading frame protein OS=Homo sapiens OX=       | 195,25 | 10 |
| 84  | Q2WVGJ9    | FR1L6_HUMAN Fer-1-like protein 6 OS=Homo sapiens OX=9606 GN=FER1L6 PE=2 SV=      | 245,97 | 10 |
| 85  | Q6P4F1     | FUT10_HUMAN Alpha-(1_3)-fucosyltransferase 10 OS=Homo sapiens OX=9606 GN=FU      | 208,74 | 10 |
| 86  | Q9NR63     | CP26B_HUMAN Cytochrome P450 26B1 OS=Homo sapiens OX=9606 GN=CYP26B1 PE=          | 297,32 | 10 |
| 87  | Q96QC0     | PP1RA_HUMAN Serine/threonine-protein phosphatase 1 regulatory subunit 10 OS=Hc   | 398,38 | 10 |
| 88  | Q9Y2T3     | GUAD_HUMAN Guanine deaminase OS=Homo sapiens OX=9606 GN=GDA PE=1 SV=1            | 233,39 | 10 |
| 89  | Q15006     | EMC2_HUMAN ER membrane protein complex subunit 2 OS=Homo sapiens OX=9606         | 180,68 | 10 |
| 90  | Q96AC1     | FERM2_HUMAN Fermitin family homolog 2 OS=Homo sapiens OX=9606 GN=FERMT2 I        | 319,23 | 10 |
| 91  | Q8TCJ2     | STT3B_HUMAN Dolichyl-diphosphooligosaccharide--protein glycosyltransferase subun | 171,01 | 10 |
| 92  | Q8WVE0     | EFMT1_HUMAN EEF1A lysine methyltransferase 1 OS=Homo sapiens OX=9606 GN=EE       | 400,44 | 10 |
| 93  | Q8IV20     | LACC1_HUMAN Laccase domain-containing protein 1 OS=Homo sapiens OX=9606 GN=      | 265,99 | 10 |
| 94  | Q68D10     | SPT2_HUMAN Protein SPT2 homolog OS=Homo sapiens OX=9606 GN=SPTY2D1 PE=1 S        | 108,19 | 10 |
| 95  | Q13177     | PAK2_HUMAN Serine/threonine-protein kinase PAK 2 OS=Homo sapiens OX=9606 GN      | 211,6  | 10 |
| 96  | Q9Y333     | LSM2_HUMAN U6 snRNA-associated Sm-like protein LSM2 OS=Homo sapiens OX=960       | 393,67 | 10 |
| 97  | Q9Y5X1     | SNX9_HUMAN Sorting nexin-9 OS=Homo sapiens OX=9606 GN=SNX9 PE=1 SV=1             | 200,12 | 10 |
| 98  | Q6TDU7     | CASC1_HUMAN Protein CASC1 OS=Homo sapiens OX=9606 GN=CASC1 PE=2 SV=2             | 255,63 | 10 |
| 99  | A0A0C4DH25 | KVD20_HUMAN Immunoglobulin kappa variable 3D-20 OS=Homo sapiens OX=9606 GI       | 285,94 | 10 |
| 100 | P10619     | PPGB_HUMAN Lysosomal protective protein OS=Homo sapiens OX=9606 GN=CTSA PE       | 246,35 | 10 |
| 101 | Q13155     | AIMP2_HUMAN Aminoacyl tRNA synthase complex-interacting multifunctional proteir  | 295,22 | 10 |
| 102 | Q9Y314     | NOSIP_HUMAN Nitric oxide synthase-interacting protein OS=Homo sapiens OX=9606    | 387,12 | 10 |
| 103 | Q9Y5V0     | ZN706_HUMAN Zinc finger protein 706 OS=Homo sapiens OX=9606 GN=ZNF706 PE=1       | 329,1  | 10 |
| 104 | Q8IXT1     | DDIAS_HUMAN DNA damage-induced apoptosis suppressor protein OS=Homo sapiens      | 266,83 | 10 |
| 105 | O95373     | IPO7_HUMAN Importin-7 OS=Homo sapiens OX=9606 GN=IPO7 PE=1 SV=1                  | 271,35 | 10 |
| 106 | Q8N163     | CCAR2_HUMAN Cell cycle and apoptosis regulator protein 2 OS=Homo sapiens OX=96   | 457,73 | 10 |
| 107 | Q13148     | TADBP_HUMAN TAR DNA-binding protein 43 OS=Homo sapiens OX=9606 GN=TARDBF         | 239,13 | 10 |
| 108 | Q16401     | PSMD5_HUMAN 26S proteasome non-ATPase regulatory subunit 5 OS=Homo sapiens       | 185,46 | 10 |
| 109 | Q86VM9     | ZCH18_HUMAN Zinc finger CCCH domain-containing protein 18 OS=Homo sapiens OX=    | 103,91 | 10 |
| 110 | Q9H930     | SP14L_HUMAN Nuclear body protein SP140-like protein OS=Homo sapiens OX=9606 C    | 126,98 | 10 |
| 111 | P01619     | KV320_HUMAN Immunoglobulin kappa variable 3-20 OS=Homo sapiens OX=9606 GN=       | 285,94 | 10 |
| 112 | P28838     | AMPL_HUMAN Cytosol aminopeptidase OS=Homo sapiens OX=9606 GN=LAP3 PE=1 S         | 300,15 | 10 |

|     |        |                                                                                          |        |    |
|-----|--------|------------------------------------------------------------------------------------------|--------|----|
| 113 | P05089 | ARGI1_HUMAN Arginase-1 OS=Homo sapiens OX=9606 GN=ARG1 PE=1 SV=2                         | 271,83 | 10 |
| 114 | O60241 | AGRB2_HUMAN Adhesion G protein-coupled receptor B2 OS=Homo sapiens OX=9606               | 190,02 | 10 |
| 115 | Q96DB5 | RMD1_HUMAN Regulator of microtubule dynamics protein 1 OS=Homo sapiens OX=9606           | 201,08 | 10 |
| 116 | P26640 | SYVC_HUMAN Valine--tRNA ligase OS=Homo sapiens OX=9606 GN=VARS PE=1 SV=4                 | 198,02 | 10 |
| 117 | P34896 | GLYC_HUMAN Serine hydroxymethyltransferase_ cytosolic OS=Homo sapiens OX=9606            | 520,75 | 10 |
| 118 | P42785 | PCP_HUMAN Lysosomal Pro-X carboxypeptidase OS=Homo sapiens OX=9606 GN=PCP                | 278,41 | 10 |
| 119 | P05067 | A4_HUMAN Amyloid-beta A4 protein OS=Homo sapiens OX=9606 GN=APP PE=1 SV=3                | 240,79 | 10 |
| 120 | Q13103 | SPP24_HUMAN Secreted phosphoprotein 24 OS=Homo sapiens OX=9606 GN=SPP2 PE                | 308,93 | 10 |
| 121 | Q9Y624 | JAM1_HUMAN Junctional adhesion molecule A OS=Homo sapiens OX=9606 GN=F11R                | 250,63 | 10 |
| 122 | Q99471 | PFD5_HUMAN Prefoldin subunit 5 OS=Homo sapiens OX=9606 GN=PFDN5 PE=1 SV=2                | 181,56 | 10 |
| 123 | Q15637 | SF01_HUMAN Splicing factor 1 OS=Homo sapiens OX=9606 GN=SF1 PE=1 SV=4                    | 304,77 | 10 |
| 124 | Q7Z4V5 | HDGR2_HUMAN Hepatoma-derived growth factor-related protein 2 OS=Homo sapiens             | 207,32 | 10 |
| 125 | P23368 | MAOM_HUMAN NAD-dependent malic enzyme_ mitochondrial OS=Homo sapiens OX=9606             | 147,65 | 10 |
| 126 | Q9Y617 | SERC_HUMAN Phosphoserine aminotransferase OS=Homo sapiens OX=9606 GN=PSAT                | 508,14 | 10 |
| 127 | P06493 | CDK1_HUMAN Cyclin-dependent kinase 1 OS=Homo sapiens OX=9606 GN=CDK1 PE=1                | 272,87 | 10 |
| 128 | Q15629 | TRAM1_HUMAN Translocating chain-associated membrane protein 1 OS=Homo sapiens            | 191,5  | 10 |
| 129 | Q96Q89 | KI20B_HUMAN Kinesin-like protein KIF20B OS=Homo sapiens OX=9606 GN=KIF20B PE=1           | 172,46 | 10 |
| 130 | P06126 | CD1A_HUMAN T-cell surface glycoprotein CD1a OS=Homo sapiens OX=9606 GN=CD1A              | 284,56 | 10 |
| 131 | O60551 | NMT2_HUMAN Glycylpeptide N-tetradecanoyltransferase 2 OS=Homo sapiens OX=9606            | 200,74 | 10 |
| 132 | P07203 | GPX1_HUMAN Glutathione peroxidase 1 OS=Homo sapiens OX=9606 GN=GPX1 PE=1 SV=2            | 419,98 | 10 |
| 133 | Q7Z4T9 | CFA91_HUMAN Cilia- and flagella-associated protein 91 OS=Homo sapiens OX=9606 GN=        | 180,07 | 10 |
| 134 | Q7Z4T8 | GLTL5_HUMAN Inactive polypeptide N-acetylgalactosaminyltransferase-like protein 5        | 449,95 | 10 |
| 135 | Q9UDY6 | TRI10_HUMAN Tripartite motif-containing protein 10 OS=Homo sapiens OX=9606 GN=           | 283,74 | 10 |
| 136 | Q6UXP7 | F151B_HUMAN Protein FAM151B OS=Homo sapiens OX=9606 GN=FAM151B PE=1 SV=2                 | 170,72 | 10 |
| 137 | Q99442 | SEC62_HUMAN Translocation protein SEC62 OS=Homo sapiens OX=9606 GN=SEC62 PE=1            | 300,99 | 10 |
| 138 | Q9UNL2 | SSRG_HUMAN Translocon-associated protein subunit gamma OS=Homo sapiens OX=9606           | 208,07 | 10 |
| 139 | P05026 | AT1B1_HUMAN Sodium/potassium-transporting ATPase subunit beta-1 OS=Homo sapiens          | 639,78 | 10 |
| 140 | Q7Z4S6 | KI21A_HUMAN Kinesin-like protein KIF21A OS=Homo sapiens OX=9606 GN=KIF21A PE=1           | 125,23 | 10 |
| 141 | Q99439 | CNN2_HUMAN Calponin-2 OS=Homo sapiens OX=9606 GN=CNN2 PE=1 SV=4                          | 247,05 | 10 |
| 142 | O00303 | EIF3F_HUMAN Eukaryotic translation initiation factor 3 subunit F OS=Homo sapiens OX=9606 | 314,1  | 10 |
| 143 | Q9Y2G7 | ZFP30_HUMAN Zinc finger protein 30 homolog OS=Homo sapiens OX=9606 GN=ZFP30              | 431,2  | 10 |

|     |        |                                                                                                                      |        |    |
|-----|--------|----------------------------------------------------------------------------------------------------------------------|--------|----|
| 144 | Q99798 | ACON_HUMAN Aconitate hydratase_ mitochondrial OS=Homo sapiens OX=9606 GN=ACON                                        | 261,04 | 10 |
| 145 | Q99797 | MIPEP_HUMAN Mitochondrial intermediate peptidase OS=Homo sapiens OX=9606 GN=MIPEP                                    | 341,72 | 10 |
| 146 | Q96A65 | EXOC4_HUMAN Exocyst complex component 4 OS=Homo sapiens OX=9606 GN=EXOC4                                             | 316,34 | 10 |
| 147 | O75153 | CLU_HUMAN Clustered mitochondria protein homolog OS=Homo sapiens OX=9606 GN=CLU                                      | 218,07 | 10 |
| 148 | Q13418 | ILK_HUMAN Integrin-linked protein kinase OS=Homo sapiens OX=9606 GN=ILK PE=1 SV=1                                    | 336,85 | 10 |
| 149 | Q6UXN7 | TO20L_HUMAN TOMM20-like protein 1 OS=Homo sapiens OX=9606 GN=TOMM20L PE=1 SV=1                                       | 377,65 | 10 |
| 150 | Q9Y5L4 | TIM13_HUMAN Mitochondrial import inner membrane translocase subunit Tim13 OS=Homo sapiens OX=9606 GN=TIM13 PE=1 SV=1 | 861,39 | 10 |
| 151 | O60888 | CUTA_HUMAN Protein CutA OS=Homo sapiens OX=9606 GN=CUTA PE=1 SV=2                                                    | 230,16 | 10 |
| 152 | O95996 | APCL_HUMAN Adenomatous polyposis coli protein 2 OS=Homo sapiens OX=9606 GN=APCL                                      | 111,13 | 10 |
| 153 | Q13409 | DC1I2_HUMAN Cytoplasmic dynein 1 intermediate chain 2 OS=Homo sapiens OX=9606 GN=DC1I2                               | 258,8  | 10 |
| 154 | Q13404 | UB2V1_HUMAN Ubiquitin-conjugating enzyme E2 variant 1 OS=Homo sapiens OX=9606 GN=UB2V1                               | 499,74 | 10 |
| 155 | O15264 | MK13_HUMAN Mitogen-activated protein kinase 13 OS=Homo sapiens OX=9606 GN=MK13                                       | 189,74 | 10 |
| 156 | O95983 | MBD3_HUMAN Methyl-CpG-binding domain protein 3 OS=Homo sapiens OX=9606 GN=MBD3                                       | 197,97 | 10 |
| 157 | Q32MZ4 | LRRF1_HUMAN Leucine-rich repeat flightless-interacting protein 1 OS=Homo sapiens OX=9606 GN=LRRF1                    | 184,16 | 10 |
| 158 | Q8TBZ2 | MYBPP_HUMAN MYCBP-associated protein OS=Homo sapiens OX=9606 GN=MYBPP                                                | 493,38 | 10 |
| 159 | P14324 | FPPS_HUMAN Farnesyl pyrophosphate synthase OS=Homo sapiens OX=9606 GN=FPPS                                           | 228,29 | 10 |
| 160 | O15258 | RER1_HUMAN Protein RER1 OS=Homo sapiens OX=9606 GN=RER1 PE=1 SV=1                                                    | 246,48 | 10 |
| 161 | O60503 | ADCY9_HUMAN Adenylate cyclase type 9 OS=Homo sapiens OX=9606 GN=ADCY9 PE=1 SV=1                                      | 192,99 | 10 |
| 162 | P0DN82 | O12D1_HUMAN Olfactory receptor 12D1 OS=Homo sapiens OX=9606 GN=OR12D1 PE=1 SV=1                                      | 239,74 | 10 |
| 163 | O75489 | NDUS3_HUMAN NADH dehydrogenase [ubiquinone] iron-sulfur protein 3_ mitochondrial OS=Homo sapiens OX=9606 GN=NDUS3    | 272,46 | 10 |
| 164 | Q8TBY8 | PMFBP_HUMAN Polyamine-modulated factor 1-binding protein 1 OS=Homo sapiens OX=9606 GN=PMFBP                          | 294,81 | 10 |
| 165 | O00625 | PIR_HUMAN Pirin OS=Homo sapiens OX=9606 GN=PIR PE=1 SV=1                                                             | 454,15 | 10 |
| 166 | P0DN76 | U2AF5_HUMAN Splicing factor U2AF 35 kDa subunit-like protein OS=Homo sapiens OX=9606 GN=U2AF5                        | 178,57 | 10 |
| 167 | P55145 | MANF_HUMAN Mesencephalic astrocyte-derived neurotrophic factor OS=Homo sapiens OX=9606 GN=MANF                       | 292,41 | 10 |
| 168 | Q9BXY0 | MAK16_HUMAN Protein MAK16 homolog OS=Homo sapiens OX=9606 GN=MAK16 PE=1 SV=1                                         | 235,49 | 10 |
| 169 | O75477 | ERLN1_HUMAN Erlin-1 OS=Homo sapiens OX=9606 GN=ERLN1 PE=1 SV=1                                                       | 282,74 | 10 |
| 170 | Q8N752 | KC1AL_HUMAN Casein kinase I isoform alpha-like OS=Homo sapiens OX=9606 GN=CK1A                                       | 230,86 | 10 |
| 171 | Q9Y2B0 | CNPY2_HUMAN Protein canopy homolog 2 OS=Homo sapiens OX=9606 GN=CNPY2 PE=1 SV=1                                      | 406,54 | 10 |
| 172 | Q04759 | KPCT_HUMAN Protein kinase C theta type OS=Homo sapiens OX=9606 GN=PRKCQ PE=1 SV=1                                    | 331,59 | 10 |
| 173 | O43615 | TIM44_HUMAN Mitochondrial import inner membrane translocase subunit TIM44 OS=Homo sapiens OX=9606 GN=TIM44           | 224,78 | 10 |
| 174 | P63027 | VAMP2_HUMAN Vesicle-associated membrane protein 2 OS=Homo sapiens OX=9606 GN=VAMP2                                   | 777,06 | 10 |

|     |        |                                                                                   |        |    |
|-----|--------|-----------------------------------------------------------------------------------|--------|----|
| 175 | Q9Y2A7 | NCKP1_HUMAN Nck-associated protein 1 OS=Homo sapiens OX=9606 GN=NCKAP1 PE         | 252,05 | 10 |
| 176 | P48681 | NEST_HUMAN Nestin OS=Homo sapiens OX=9606 GN=NES PE=1 SV=2                        | 402,81 | 10 |
| 177 | Q8WXX5 | DNJC9_HUMAN DnaJ homolog subfamily C member 9 OS=Homo sapiens OX=9606 GN=         | 314,19 | 10 |
| 178 | B2RXH8 | HNRC2_HUMAN Heterogeneous nuclear ribonucleoprotein C-like 2 OS=Homo sapiens      | 309,22 | 10 |
| 179 | O15212 | PFD6_HUMAN Prefoldin subunit 6 OS=Homo sapiens OX=9606 GN=PFDN6 PE=1 SV=1         | 276,29 | 10 |
| 180 | Q16099 | GRIK4_HUMAN Glutamate receptor ionotropic_ kainate 4 OS=Homo sapiens OX=9606      | 251,13 | 10 |
| 181 | O60812 | HNRC1_HUMAN Heterogeneous nuclear ribonucleoprotein C-like 1 OS=Homo sapiens      | 305,03 | 10 |
| 182 | P0DMR1 | HNRC4_HUMAN Heterogeneous nuclear ribonucleoprotein C-like 4 OS=Homo sapiens      | 305,03 | 10 |
| 183 | P56545 | CTBP2_HUMAN C-terminal-binding protein 2 OS=Homo sapiens OX=9606 GN=CTBP2 F       | 264,74 | 10 |
| 184 | P06730 | IF4E_HUMAN Eukaryotic translation initiation factor 4E OS=Homo sapiens OX=9606 GI | 487,08 | 10 |
| 185 | P07814 | SYEP_HUMAN Bifunctional glutamate/proline--tRNA ligase OS=Homo sapiens OX=9606    | 303,7  | 10 |
| 186 | P62256 | UBE2H_HUMAN Ubiquitin-conjugating enzyme E2 H OS=Homo sapiens OX=9606 GN=l        | 500,39 | 10 |
| 187 | Q96T21 | SEBP2_HUMAN Selenocysteine insertion sequence-binding protein 2 OS=Homo sapier    | 106,26 | 10 |
| 188 | P06727 | APOA4_HUMAN Apolipoprotein A-IV OS=Homo sapiens OX=9606 GN=APOA4 PE=1 SV:         | 194,38 | 10 |
| 189 | P19174 | PLCG1_HUMAN 1-phosphatidylinositol 4_5-bisphosphate phosphodiesterase gamma-      | 278,21 | 10 |
| 190 | Q9BXS5 | AP1M1_HUMAN AP-1 complex subunit mu-1 OS=Homo sapiens OX=9606 GN=AP1M1            | 185,86 | 10 |
| 191 | P29590 | PML_HUMAN Protein PML OS=Homo sapiens OX=9606 GN=PML PE=1 SV=3                    | 375,8  | 10 |
| 192 | A3KMH1 | VWA8_HUMAN von Willebrand factor A domain-containing protein 8 OS=Homo sapier     | 228,23 | 10 |
| 193 | Q8N9S9 | SNX31_HUMAN Sorting nexin-31 OS=Homo sapiens OX=9606 GN=SNX31 PE=1 SV=3           | 198,93 | 10 |
| 194 | Q00341 | VIGLN_HUMAN Vigilin OS=Homo sapiens OX=9606 GN=HDLBP PE=1 SV=2                    | 188,48 | 10 |
| 195 | P20674 | COX5A_HUMAN Cytochrome c oxidase subunit 5A_ mitochondrial OS=Homo sapiens C      | 366,05 | 10 |
| 196 | Q9H227 | GBA3_HUMAN Cytosolic beta-glucosidase OS=Homo sapiens OX=9606 GN=GBA3 PE=1        | 234,54 | 10 |
| 197 | Q96SN8 | CK5P2_HUMAN CDK5 regulatory subunit-associated protein 2 OS=Homo sapiens OX=9     | 279,87 | 10 |
| 198 | P28482 | MK01_HUMAN Mitogen-activated protein kinase 1 OS=Homo sapiens OX=9606 GN=N        | 598,7  | 10 |
| 199 | Q9P035 | HACD3_HUMAN Very-long-chain (3R)-3-hydroxyacyl-CoA dehydratase 3 OS=Homo sap      | 243,19 | 10 |
| 200 | Q12929 | EPS8_HUMAN Epidermal growth factor receptor kinase substrate 8 OS=Homo sapiens    | 305,15 | 10 |
| 201 | Q9BUJ2 | HNRL1_HUMAN Heterogeneous nuclear ribonucleoprotein U-like protein 1 OS=Homo      | 277,28 | 10 |
| 202 | Q86V81 | THOC4_HUMAN THO complex subunit 4 OS=Homo sapiens OX=9606 GN=ALYREF PE=1          | 165,6  | 10 |
| 203 | Q9HB07 | MYG1_HUMAN UPF0160 protein MYG1_ mitochondrial OS=Homo sapiens OX=9606 G          | 276,04 | 10 |
| 204 | P22830 | HEMH_HUMAN Ferrochelatase_ mitochondrial OS=Homo sapiens OX=9606 GN=FECH          | 284,55 | 10 |
| 205 | Q3ZCX4 | ZN568_HUMAN Zinc finger protein 568 OS=Homo sapiens OX=9606 GN=ZNF568 PE=2        | 231,64 | 10 |

|     |        |                                                                                               |         |    |
|-----|--------|-----------------------------------------------------------------------------------------------|---------|----|
| 206 | P30711 | GSTT1_HUMAN Glutathione S-transferase theta-1 OS=Homo sapiens OX=9606 GN=GS                   | 268,32  | 10 |
| 207 | P20648 | ATP4A_HUMAN Potassium-transporting ATPase alpha chain 1 OS=Homo sapiens OX=9606 GN=ATP4A      | 205,9   | 10 |
| 208 | P14927 | QCR7_HUMAN Cytochrome b-c1 complex subunit 7 OS=Homo sapiens OX=9606 GN=L                     | 465,48  | 10 |
| 209 | Q12907 | LMAN2_HUMAN Vesicular integral-membrane protein VIP36 OS=Homo sapiens OX=9606 GN=LMAN2        | 270,05  | 10 |
| 210 | Q12906 | ILF3_HUMAN Interleukin enhancer-binding factor 3 OS=Homo sapiens OX=9606 GN=ILF3              | 236,4   | 10 |
| 211 | Q12905 | ILF2_HUMAN Interleukin enhancer-binding factor 2 OS=Homo sapiens OX=9606 GN=ILF2              | 288,73  | 10 |
| 212 | A6NC57 | ANR62_HUMAN Ankyrin repeat domain-containing protein 62 OS=Homo sapiens OX=9606 GN=ANR62      | 314,25  | 10 |
| 213 | Q9BRA2 | TXD17_HUMAN Thioredoxin domain-containing protein 17 OS=Homo sapiens OX=9606 GN=TXD17         | 461,74  | 10 |
| 214 | Q96G28 | CFA36_HUMAN Cilia- and flagella-associated protein 36 OS=Homo sapiens OX=9606 GN=CFA36        | 419,44  | 10 |
| 215 | Q969X0 | RIPL2_HUMAN RILP-like protein 2 OS=Homo sapiens OX=9606 GN=RILPL2 PE=1 SV=1                   | 269,02  | 10 |
| 216 | Q86XZ4 | SPAS2_HUMAN Spermatogenesis-associated serine-rich protein 2 OS=Homo sapiens OX=9606 GN=SPAS2 | 148,73  | 10 |
| 217 | P01225 | FSHB_HUMAN Follitropin subunit beta OS=Homo sapiens OX=9606 GN=FSHB PE=1 SV=1                 | 171,52  | 10 |
| 218 | P61457 | PHS_HUMAN Pterin-4-alpha-carbinolamine dehydratase OS=Homo sapiens OX=9606 GN=PHS             | 205,69  | 10 |
| 219 | Q9BXL7 | CAR11_HUMAN Caspase recruitment domain-containing protein 11 OS=Homo sapiens OX=9606 GN=CAR11 | 148,67  | 10 |
| 220 | P35244 | RFA3_HUMAN Replication protein A 14 kDa subunit OS=Homo sapiens OX=9606 GN=RFA3               | 1086,01 | 10 |
| 221 | Q76KD6 | SPERI_HUMAN Speriolin OS=Homo sapiens OX=9606 GN=SPATC1 PE=2 SV=2                             | 181,01  | 10 |
| 222 | Q13098 | CSN1_HUMAN COP9 signalosome complex subunit 1 OS=Homo sapiens OX=9606 GN=CSN1                 | 243,32  | 10 |
| 223 | P62891 | RL39_HUMAN 60S ribosomal protein L39 OS=Homo sapiens OX=9606 GN=RPL39 PE=1 SV=1               | 1654,71 | 10 |
| 224 | Q9UMX0 | UBQL1_HUMAN Ubiquilin-1 OS=Homo sapiens OX=9606 GN=UBQLN1 PE=1 SV=2                           | 283,3   | 10 |
| 225 | Q9H4Q3 | PRD13_HUMAN PR domain zinc finger protein 13 OS=Homo sapiens OX=9606 GN=PRD13                 | 260,39  | 10 |
| 226 | Q96IU4 | ABHEB_HUMAN Protein ABHD14B OS=Homo sapiens OX=9606 GN=ABHD14B PE=1 SV=1                      | 274,14  | 10 |
| 227 | O14732 | IMPA2_HUMAN Inositol monophosphatase 2 OS=Homo sapiens OX=9606 GN=IMPA2                       | 316,22  | 10 |
| 228 | Q9UJQ7 | SCP2D_HUMAN SCP2 sterol-binding domain-containing protein 1 OS=Homo sapiens OX=9606 GN=SCP2D  | 367,51  | 10 |
| 229 | Q9UN86 | G3BP2_HUMAN Ras GTPase-activating protein-binding protein 2 OS=Homo sapiens OX=9606 GN=G3BP2  | 249,62  | 10 |
| 230 | Q14165 | MLEC_HUMAN Malectin OS=Homo sapiens OX=9606 GN=MLEC PE=1 SV=1                                 | 172,37  | 10 |
| 231 | Q8N6D5 | ANR29_HUMAN Ankyrin repeat domain-containing protein 29 OS=Homo sapiens OX=9606 GN=ANR29      | 273,57  | 10 |
| 232 | Q9UGI8 | TES_HUMAN Testin OS=Homo sapiens OX=9606 GN=TES PE=1 SV=1                                     | 186,83  | 10 |
| 233 | Q8WXI9 | P66B_HUMAN Transcriptional repressor p66-beta OS=Homo sapiens OX=9606 GN=GA                   | 298,48  | 10 |
| 234 | Q9P2P5 | HECW2_HUMAN E3 ubiquitin-protein ligase HECW2 OS=Homo sapiens OX=9606 GN=HECW2                | 136,87  | 10 |
| 235 | P19784 | CSK22_HUMAN Casein kinase II subunit alpha' OS=Homo sapiens OX=9606 GN=CSNK2                  | 203,69  | 10 |
| 236 | Q92698 | RAD54_HUMAN DNA repair and recombination protein RAD54-like OS=Homo sapiens OX=9606 GN=RAD54  | 156,04  | 10 |



|     |        |                                                                                   |        |    |
|-----|--------|-----------------------------------------------------------------------------------|--------|----|
| 237 | O96008 | TOM40_HUMAN Mitochondrial import receptor subunit TOM40 homolog OS=Homo s         | 253,7  | 10 |
| 238 | Q9H4M9 | EHD1_HUMAN EH domain-containing protein 1 OS=Homo sapiens OX=9606 GN=EHD1         | 194,97 | 10 |
| 239 | P52788 | SPSY_HUMAN Spermine synthase OS=Homo sapiens OX=9606 GN=SMS PE=1 SV=2             | 565,94 | 10 |
| 240 | Q14498 | RBM39_HUMAN RNA-binding protein 39 OS=Homo sapiens OX=9606 GN=RBM39 PE=           | 236,35 | 10 |
| 241 | O95273 | CCDB1_HUMAN Cyclin-D1-binding protein 1 OS=Homo sapiens OX=9606 GN=CCNDBP         | 164,15 | 10 |
| 242 | Q14494 | NF2L1_HUMAN Endoplasmic reticulum membrane sensor NFE2L1 OS=Homo sapiens C        | 278,31 | 10 |
| 243 | Q8TBF8 | FA81A_HUMAN Protein FAM81A OS=Homo sapiens OX=9606 GN=FAM81A PE=2 SV=3            | 308,28 | 10 |
| 244 | Q8TEL6 | TP4AP_HUMAN Short transient receptor potential channel 4-associated protein OS=H  | 255,71 | 10 |
| 245 | Q13045 | FLII_HUMAN Protein flightless-1 homolog OS=Homo sapiens OX=9606 GN=FLII PE=1 S    | 149,95 | 10 |
| 246 | A6NHY2 | AKD1B_HUMAN Ankyrin repeat and death domain-containing protein 1B OS=Homo sa      | 262,49 | 10 |
| 247 | Q9UMS4 | PRP19_HUMAN Pre-mRNA-processing factor 19 OS=Homo sapiens OX=9606 GN=PRPF         | 216,69 | 10 |
| 248 | P36639 | 8ODP_HUMAN 7_8-dihydro-8-oxoguanine triphosphatase OS=Homo sapiens OX=9606        | 390,82 | 10 |
| 249 | P45973 | CBX5_HUMAN Chromobox protein homolog 5 OS=Homo sapiens OX=9606 GN=CBX5 P          | 188,49 | 10 |
| 250 | Q9H4L7 | SMRCD_HUMAN SWI/SNF-related matrix-associated actin-dependent regulator of chr    | 104,64 | 10 |
| 251 | P19404 | NDUV2_HUMAN NADH dehydrogenase [ubiquinone] flavoprotein 2_ mitochondrial O       | 267,16 | 10 |
| 252 | Q96FJ2 | DYL2_HUMAN Dynein light chain 2_ cytoplasmic OS=Homo sapiens OX=9606 GN=DYN       | 546,48 | 10 |
| 253 | Q96IP4 | FA46A_HUMAN Putative nucleotidyltransferase FAM46A OS=Homo sapiens OX=9606        | 234,06 | 10 |
| 254 | Q16653 | MOG_HUMAN Myelin-oligodendrocyte glycoprotein OS=Homo sapiens OX=9606 GN=         | 250,89 | 10 |
| 255 | Q9UMR2 | DD19B_HUMAN ATP-dependent RNA helicase DDX19B OS=Homo sapiens OX=9606 GN          | 158,83 | 10 |
| 256 | Q9C035 | TRIM5_HUMAN Tripartite motif-containing protein 5 OS=Homo sapiens OX=9606 GN=     | 201,47 | 10 |
| 257 | Q5VTR2 | BRE1A_HUMAN E3 ubiquitin-protein ligase BRE1A OS=Homo sapiens OX=9606 GN=RN       | 363,06 | 10 |
| 258 | Q86Y38 | XYLT1_HUMAN Xylosyltransferase 1 OS=Homo sapiens OX=9606 GN=XYLT1 PE=1 SV=1       | 411,95 | 10 |
| 259 | Q15560 | TCEA2_HUMAN Transcription elongation factor A protein 2 OS=Homo sapiens OX=960    | 279,64 | 10 |
| 260 | Q14116 | IL18_HUMAN Interleukin-18 OS=Homo sapiens OX=9606 GN=IL18 PE=1 SV=1               | 331,57 | 10 |
| 261 | P41252 | SYIC_HUMAN Isoleucine--tRNA ligase_ cytoplasmic OS=Homo sapiens OX=9606 GN=IA     | 224,36 | 10 |
| 262 | P42338 | PK3CB_HUMAN Phosphatidylinositol 4_5-bisphosphate 3-kinase catalytic subunit beta | 177,03 | 10 |
| 263 | P08237 | PFKAM_HUMAN ATP-dependent 6-phosphofructokinase_ muscle type OS=Homo sapi         | 395,64 | 10 |
| 264 | Q96CB9 | NSUN4_HUMAN 5-methylcytosine rRNA methyltransferase NSUN4 OS=Homo sapiens         | 307,29 | 10 |
| 265 | Q14108 | SCRB2_HUMAN Lysosome membrane protein 2 OS=Homo sapiens OX=9606 GN=SCAR           | 205,64 | 10 |
| 266 | P08590 | MYL3_HUMAN Myosin light chain 3 OS=Homo sapiens OX=9606 GN=MYL3 PE=1 SV=3         | 512,55 | 10 |
| 267 | Q06210 | GFPT1_HUMAN Glutamine--fructose-6-phosphate aminotransferase [isomerizing] 1 O    | 189,22 | 10 |

|     |        |                                                                                     |        |    |
|-----|--------|-------------------------------------------------------------------------------------|--------|----|
| 268 | Q9UPV0 | CE164_HUMAN Centrosomal protein of 164 kDa OS=Homo sapiens OX=9606 GN=CEP1          | 148,93 | 10 |
| 269 | Q8IZV5 | RDH10_HUMAN Retinol dehydrogenase 10 OS=Homo sapiens OX=9606 GN=RDH10 PE            | 230,8  | 10 |
| 270 | O95232 | LC7L3_HUMAN Luc7-like protein 3 OS=Homo sapiens OX=9606 GN=LUC7L3 PE=1 SV=2         | 269,33 | 10 |
| 271 | Q16629 | SRSF7_HUMAN Serine/arginine-rich splicing factor 7 OS=Homo sapiens OX=9606 GN=!     | 352,41 | 10 |
| 272 | P09669 | COX6C_HUMAN Cytochrome c oxidase subunit 6C OS=Homo sapiens OX=9606 GN=CO           | 703,1  | 10 |
| 273 | Q13363 | CTBP1_HUMAN C-terminal-binding protein 1 OS=Homo sapiens OX=9606 GN=CTBP1 F         | 273,82 | 10 |
| 274 | P08579 | RU2B_HUMAN U2 small nuclear ribonucleoprotein B'' OS=Homo sapiens OX=9606 GN        | 208,78 | 10 |
| 275 | P11908 | PRPS2_HUMAN Ribose-phosphate pyrophosphokinase 2 OS=Homo sapiens OX=9606 (          | 666,86 | 10 |
| 276 | Q14444 | CAPR1_HUMAN Caprin-1 OS=Homo sapiens OX=9606 GN=CAPRIN1 PE=1 SV=2                   | 225,85 | 10 |
| 277 | Q6ZS92 | YD022_HUMAN Putative uncharacterized protein FLJ45721 OS=Homo sapiens OX=960        | 237,28 | 10 |
| 278 | O43237 | DC1L2_HUMAN Cytoplasmic dynein 1 light intermediate chain 2 OS=Homo sapiens OX      | 260,18 | 10 |
| 279 | Q5VX52 | SPAT1_HUMAN Spermatogenesis-associated protein 1 OS=Homo sapiens OX=9606 GN         | 174,08 | 10 |
| 280 | P50552 | VASP_HUMAN Vasodilator-stimulated phosphoprotein OS=Homo sapiens OX=9606 GI         | 256,96 | 10 |
| 281 | Q92628 | K0232_HUMAN Uncharacterized protein KIAA0232 OS=Homo sapiens OX=9606 GN=KI          | 283,96 | 10 |
| 282 | Q9NPJ3 | ACO13_HUMAN Acyl-coenzyme A thioesterase 13 OS=Homo sapiens OX=9606 GN=AC           | 429,22 | 10 |
| 283 | P40126 | TYRP2_HUMAN L-dopachrome tautomerase OS=Homo sapiens OX=9606 GN=DCT PE=             | 143,84 | 10 |
| 284 | O00584 | RNT2_HUMAN Ribonuclease T2 OS=Homo sapiens OX=9606 GN=RNASET2 PE=1 SV=2             | 214,14 | 10 |
| 285 | Q13347 | EIF3I_HUMAN Eukaryotic translation initiation factor 3 subunit I OS=Homo sapiens OX | 158,46 | 10 |
| 286 | P41567 | EIF1_HUMAN Eukaryotic translation initiation factor 1 OS=Homo sapiens OX=9606 GN    | 550,99 | 10 |
| 287 | O00217 | NDUS8_HUMAN NADH dehydrogenase [ubiquinone] iron-sulfur protein 8_ mitochond        | 405,98 | 10 |
| 288 | Q92973 | TNPO1_HUMAN Transportin-1 OS=Homo sapiens OX=9606 GN=TNPO1 PE=1 SV=2                | 222,28 | 10 |
| 289 | Q9UPR0 | PLCL2_HUMAN Inactive phospholipase C-like protein 2 OS=Homo sapiens OX=9606 GN      | 249,52 | 10 |
| 290 | Q9H4E7 | DEFI6_HUMAN Differentially expressed in FDCEP 6 homolog OS=Homo sapiens OX=960      | 410,42 | 10 |
| 291 | Q86XL3 | ANKL2_HUMAN Ankyrin repeat and LEM domain-containing protein 2 OS=Homo sapie        | 249,9  | 10 |
| 292 | P30042 | ES1_HUMAN ES1 protein homolog_ mitochondrial OS=Homo sapiens OX=9606 GN=C2          | 194,16 | 10 |
| 293 | O00560 | SDCB1_HUMAN Syntenin-1 OS=Homo sapiens OX=9606 GN=SDCBP PE=1 SV=1                   | 623,67 | 10 |
| 294 | O60437 | PEPL_HUMAN Periplakin OS=Homo sapiens OX=9606 GN=PPL PE=1 SV=4                      | 105,68 | 10 |
| 295 | P51970 | NDUA8_HUMAN NADH dehydrogenase [ubiquinone] 1 alpha subcomplex subunit 8 O!         | 281,51 | 10 |
| 296 | Q01081 | U2AF1_HUMAN Splicing factor U2AF 35 kDa subunit OS=Homo sapiens OX=9606 GN=I        | 178,57 | 10 |
| 297 | Q86UE4 | LYRIC_HUMAN Protein LYRIC OS=Homo sapiens OX=9606 GN=MTDH PE=1 SV=2                 | 176,28 | 10 |
| 298 | Q9P2E3 | ZNFX1_HUMAN NFX1-type zinc finger-containing protein 1 OS=Homo sapiens OX=960       | 281,25 | 10 |

|     |        |                                                                                  |        |    |
|-----|--------|----------------------------------------------------------------------------------|--------|----|
| 299 | Q8N684 | CPSF7_HUMAN Cleavage and polyadenylation specificity factor subunit 7 OS=Homo sa | 206,06 | 10 |
| 300 | Q8WU76 | SCFD2_HUMAN Sec1 family domain-containing protein 2 OS=Homo sapiens OX=9606      | 281,03 | 10 |
| 301 | Q969G5 | CAVN3_HUMAN Caveolae-associated protein 3 OS=Homo sapiens OX=9606 GN=CAVIN       | 220,43 | 10 |
| 302 | Q15836 | VAMP3_HUMAN Vesicle-associated membrane protein 3 OS=Homo sapiens OX=9606        | 982,68 | 10 |
| 303 | O15160 | RPAC1_HUMAN DNA-directed RNA polymerases I and III subunit RPAC1 OS=Homo sap     | 259,34 | 10 |
| 304 | Q31612 | 1B73_HUMAN HLA class I histocompatibility antigen_ B-73 alpha chain OS=Homo sapi | 338,79 | 10 |
| 305 | Q8WU68 | U2AF4_HUMAN Splicing factor U2AF 26 kDa subunit OS=Homo sapiens OX=9606 GN=I     | 178,57 | 10 |
| 306 | Q96BX8 | MOB3A_HUMAN MOB kinase activator 3A OS=Homo sapiens OX=9606 GN=MOB3A PE          | 255,13 | 10 |
| 307 | O60762 | DPM1_HUMAN Dolichol-phosphate mannosyltransferase subunit 1 OS=Homo sapiens      | 260,97 | 10 |
| 308 | Q9BTT0 | AN32E_HUMAN Acidic leucine-rich nuclear phosphoprotein 32 family member E OS=H   | 223,31 | 10 |
| 309 | O15151 | MDM4_HUMAN Protein Mdm4 OS=Homo sapiens OX=9606 GN=MDM4 PE=1 SV=2                | 266,25 | 10 |
| 310 | O94782 | UBP1_HUMAN Ubiquitin carboxyl-terminal hydrolase 1 OS=Homo sapiens OX=9606 GI    | 299,58 | 10 |
| 311 | Q15819 | UB2V2_HUMAN Ubiquitin-conjugating enzyme E2 variant 2 OS=Homo sapiens OX=960     | 363,95 | 10 |
| 312 | O15146 | MUSK_HUMAN Muscle_ skeletal receptor tyrosine-protein kinase OS=Homo sapiens C   | 229,29 | 10 |
| 313 | Q92917 | GPKOW_HUMAN G-patch domain and KOW motifs-containing protein OS=Homo sapie       | 179,03 | 10 |
| 314 | P46060 | RAGP1_HUMAN Ran GTPase-activating protein 1 OS=Homo sapiens OX=9606 GN=RAM       | 292,72 | 10 |
| 315 | P14209 | CD99_HUMAN CD99 antigen OS=Homo sapiens OX=9606 GN=CD99 PE=1 SV=1                | 312,6  | 10 |
| 316 | Q13630 | FCL_HUMAN GDP-L-fucose synthase OS=Homo sapiens OX=9606 GN=TSTA3 PE=1 SV=        | 266,49 | 10 |
| 317 | B7ZW38 | HNRC3_HUMAN Heterogeneous nuclear ribonucleoprotein C-like 3 OS=Homo sapiens     | 305,03 | 10 |
| 318 | Q9NZ56 | FMN2_HUMAN Formin-2 OS=Homo sapiens OX=9606 GN=FMN2 PE=1 SV=4                    | 193,01 | 10 |
| 319 | O00505 | IMA4_HUMAN Importin subunit alpha-4 OS=Homo sapiens OX=9606 GN=KPNA3 PE=1        | 269,47 | 10 |
| 320 | O60739 | EIF1B_HUMAN Eukaryotic translation initiation factor 1b OS=Homo sapiens OX=9606  | 550,99 | 10 |
| 321 | O15126 | SCAM1_HUMAN Secretory carrier-associated membrane protein 1 OS=Homo sapiens      | 331,6  | 10 |
| 322 | P38159 | RBMX_HUMAN RNA-binding motif protein_ X chromosome OS=Homo sapiens OX=960        | 299,36 | 10 |
| 323 | P07741 | APT_HUMAN Adenine phosphoribosyltransferase OS=Homo sapiens OX=9606 GN=API       | 335,03 | 10 |
| 324 | Q8TAV0 | FA76A_HUMAN Protein FAM76A OS=Homo sapiens OX=9606 GN=FAM76A PE=2 SV=1           | 251,55 | 10 |
| 325 | Q04637 | IF4G1_HUMAN Eukaryotic translation initiation factor 4 gamma 1 OS=Homo sapiens C | 196,52 | 10 |
| 326 | O95837 | GNA14_HUMAN Guanine nucleotide-binding protein subunit alpha-14 OS=Homo sapie    | 211,36 | 10 |
| 327 | O95831 | AIFM1_HUMAN Apoptosis-inducing factor 1_ mitochondrial OS=Homo sapiens OX=96     | 189,97 | 10 |
| 328 | O75340 | PDCD6_HUMAN Programmed cell death protein 6 OS=Homo sapiens OX=9606 GN=PD        | 547,14 | 10 |
| 329 | Q99615 | DNJC7_HUMAN DnaJ homolog subfamily C member 7 OS=Homo sapiens OX=9606 GN=        | 200,4  | 10 |

|     |        |                                                                                                                        |        |    |
|-----|--------|------------------------------------------------------------------------------------------------------------------------|--------|----|
| 330 | P28070 | PSB4_HUMAN Proteasome subunit beta type-4 OS=Homo sapiens OX=9606 GN=PSME                                              | 276,07 | 10 |
| 331 | Q6DD88 | ATLA3_HUMAN Atlastin-3 OS=Homo sapiens OX=9606 GN=ATL3 PE=1 SV=1                                                       | 292,95 | 10 |
| 332 | P19086 | GNAZ_HUMAN Guanine nucleotide-binding protein G(z) subunit alpha OS=Homo sapiens OX=9606 GN=GNAZ PE=1 SV=1             | 211,36 | 10 |
| 333 | O15455 | TLR3_HUMAN Toll-like receptor 3 OS=Homo sapiens OX=9606 GN=TLR3 PE=1 SV=1                                              | 118,48 | 10 |
| 334 | Q00266 | METK1_HUMAN S-adenosylmethionine synthase isoform type-1 OS=Homo sapiens OX=9606 GN=METK1 PE=1 SV=1                    | 203,67 | 10 |
| 335 | P07711 | CATL1_HUMAN Cathepsin L1 OS=Homo sapiens OX=9606 GN=CTSL PE=1 SV=2                                                     | 290,87 | 10 |
| 336 | Q02790 | FKBP4_HUMAN Peptidyl-prolyl cis-trans isomerase FKBP4 OS=Homo sapiens OX=9606 GN=FKBP4 PE=1 SV=1                       | 346,61 | 10 |
| 337 | P20591 | MX1_HUMAN Interferon-induced GTP-binding protein Mx1 OS=Homo sapiens OX=9606 GN=MX1 PE=1 SV=1                          | 282,64 | 10 |
| 338 | Q96BQ5 | CC127_HUMAN Coiled-coil domain-containing protein 127 OS=Homo sapiens OX=9606 GN=CC127 PE=1 SV=1                       | 180,39 | 10 |
| 339 | Q09160 | 1A80_HUMAN HLA class I histocompatibility antigen_ A-80 alpha chain OS=Homo sapiens OX=9606 GN=1A80 PE=1 SV=1          | 411,75 | 10 |
| 340 | Q8TB33 | CX024_HUMAN Putative uncharacterized protein encoded by LINC01560 OS=Homo sapiens OX=9606 GN=CX024 PE=1 SV=1           | 182,96 | 10 |
| 341 | O75310 | UDB11_HUMAN UDP-glucuronosyltransferase 2B11 OS=Homo sapiens OX=9606 GN=UDB11 PE=1 SV=1                                | 424,5  | 10 |
| 342 | P14866 | HNRPL_HUMAN Heterogeneous nuclear ribonucleoprotein L OS=Homo sapiens OX=9606 GN=HNRPL PE=1 SV=1                       | 316,16 | 10 |
| 343 | Q8IZF7 | AGRF2_HUMAN Adhesion G-protein coupled receptor F2 OS=Homo sapiens OX=9606 GN=AGRF2 PE=1 SV=1                          | 264,81 | 10 |
| 344 | Q9UJ98 | STAG3_HUMAN Cohesin subunit SA-3 OS=Homo sapiens OX=9606 GN=STAG3 PE=1 SV=1                                            | 49,79  | 10 |
| 345 | Q02413 | DSG1_HUMAN Desmoglein-1 OS=Homo sapiens OX=9606 GN=DSG1 PE=1 SV=2                                                      | 211,69 | 10 |
| 346 | Q6FI81 | CPIN1_HUMAN Anamorsin OS=Homo sapiens OX=9606 GN=CIAPIN1 PE=1 SV=2                                                     | 215,78 | 10 |
| 347 | Q96C01 | F136A_HUMAN Protein FAM136A OS=Homo sapiens OX=9606 GN=FAM136A PE=1 SV=1                                               | 240,4  | 10 |
| 348 | Q00597 | FANCC_HUMAN Fanconi anemia group C protein OS=Homo sapiens OX=9606 GN=FANCC PE=1 SV=1                                  | 330,49 | 10 |
| 349 | P82979 | SARNP_HUMAN SAP domain-containing ribonucleoprotein OS=Homo sapiens OX=9606 GN=SARNP PE=1 SV=1                         | 284,72 | 10 |
| 350 | Q5JNZ3 | ZN311_HUMAN Zinc finger protein 311 OS=Homo sapiens OX=9606 GN=ZNF311 PE=2 SV=1                                        | 228,28 | 10 |
| 351 | Q13907 | IDI1_HUMAN Isopentenyl-diphosphate Delta-isomerase 1 OS=Homo sapiens OX=9606 GN=IDI1 PE=1 SV=1                         | 377,65 | 10 |
| 352 | P39880 | CUX1_HUMAN Homeobox protein cut-like 1 OS=Homo sapiens OX=9606 GN=CUX1 PE=1 SV=1                                       | 266,03 | 10 |
| 353 | Q502W6 | VWA3B_HUMAN von Willebrand factor A domain-containing protein 3B OS=Homo sapiens OX=9606 GN=VWA3B PE=1 SV=1            | 414,93 | 10 |
| 354 | Q96I99 | SUCB2_HUMAN Succinate--CoA ligase [GDP-forming] subunit beta_ mitochondrial OS=Homo sapiens OX=9606 GN=SUCB2 PE=1 SV=1 | 319,18 | 10 |
| 355 | Q6A163 | K1C39_HUMAN Keratin_ type I cytoskeletal 39 OS=Homo sapiens OX=9606 GN=KRT39 PE=1 SV=1                                 | 208,8  | 10 |
| 356 | Q08380 | LG3BP_HUMAN Galectin-3-binding protein OS=Homo sapiens OX=9606 GN=LGALS3BP PE=1 SV=1                                   | 251,28 | 10 |
| 357 | Q9UFN0 | NPS3A_HUMAN Protein NipSnap homolog 3A OS=Homo sapiens OX=9606 GN=NIPSNAP PE=1 SV=1                                    | 279,7  | 10 |
| 358 | P61009 | SPCS3_HUMAN Signal peptidase complex subunit 3 OS=Homo sapiens OX=9606 GN=SPCS3 PE=1 SV=1                              | 231,79 | 10 |
| 359 | Q7Z3B3 | KANL1_HUMAN KAT8 regulatory NSL complex subunit 1 OS=Homo sapiens OX=9606 GN=KANL1 PE=1 SV=1                           | 276,82 | 10 |
| 360 | P82932 | RT06_HUMAN 28S ribosomal protein S6_ mitochondrial OS=Homo sapiens OX=9606 GN=RT06 PE=1 SV=1                           | 546,94 | 10 |

|     |        |                                                                                                                         |        |    |
|-----|--------|-------------------------------------------------------------------------------------------------------------------------|--------|----|
| 361 | P49915 | GUAA_HUMAN GMP synthase [glutamine-hydrolyzing] OS=Homo sapiens OX=9606 GN=GUAA PE=1 SV=1                               | 335,15 | 10 |
| 362 | O75608 | LYPA1_HUMAN Acyl-protein thioesterase 1 OS=Homo sapiens OX=9606 GN=LYPLA1 PE=1 SV=1                                     | 295,14 | 10 |
| 363 | Q8TDQ7 | GNPI2_HUMAN Glucosamine-6-phosphate isomerase 2 OS=Homo sapiens OX=9606 GN=GNPI2 PE=1 SV=1                              | 156,64 | 10 |
| 364 | P10451 | OSTP_HUMAN Osteopontin OS=Homo sapiens OX=9606 GN=SPP1 PE=1 SV=1                                                        | 317,26 | 10 |
| 365 | P21964 | COMT_HUMAN Catechol O-methyltransferase OS=Homo sapiens OX=9606 GN=COMT PE=1 SV=1                                       | 316,44 | 10 |
| 366 | P28331 | NDUS1_HUMAN NADH-ubiquinone oxidoreductase 75 kDa subunit_ mitochondrial OS=Homo sapiens OX=9606 GN=NDUS1 PE=1 SV=1     | 219,91 | 10 |
| 367 | Q9BTE7 | DCNL5_HUMAN DCN1-like protein 5 OS=Homo sapiens OX=9606 GN=DCUN1D5 PE=1 SV=1                                            | 216,88 | 10 |
| 368 | Q8IW93 | ARHGJ_HUMAN Rho guanine nucleotide exchange factor 19 OS=Homo sapiens OX=9606 GN=ARHGJ PE=1 SV=1                        | 256,2  | 10 |
| 369 | P59090 | TSAS2_HUMAN Putative uncharacterized protein TSPEAR-AS2 OS=Homo sapiens OX=9606 GN=TSAS2 PE=1 SV=1                      | 317,51 | 10 |
| 370 | Q15155 | NOMO1_HUMAN Nodal modulator 1 OS=Homo sapiens OX=9606 GN=NOMO1 PE=1 SV=1                                                | 255,57 | 10 |
| 371 | Q8IVW1 | ARL17_HUMAN ADP-ribosylation factor-like protein 17 OS=Homo sapiens OX=9606 GN=ARL17 PE=1 SV=1                          | 425,78 | 10 |
| 372 | Q00526 | CDK3_HUMAN Cyclin-dependent kinase 3 OS=Homo sapiens OX=9606 GN=CDK3 PE=1 SV=1                                          | 218,32 | 10 |
| 373 | Q9NRY4 | RHG35_HUMAN Rho GTPase-activating protein 35 OS=Homo sapiens OX=9606 GN=ARHG35 PE=1 SV=1                                | 188,79 | 10 |
| 374 | Q9NYF8 | BCLF1_HUMAN Bcl-2-associated transcription factor 1 OS=Homo sapiens OX=9606 GN=BCLF1 PE=1 SV=1                          | 304,23 | 10 |
| 375 | Q16595 | FRDA_HUMAN Frataxin_ mitochondrial OS=Homo sapiens OX=9606 GN=FXN PE=1 SV=1                                             | 220,65 | 10 |
| 376 | Q15147 | PLCB4_HUMAN 1-phosphatidylinositol 4,5-bisphosphate phosphodiesterase beta-4 OS=Homo sapiens OX=9606 GN=PLCB4 PE=1 SV=1 | 287,48 | 10 |
| 377 | Q9ULV0 | MYO5B_HUMAN Unconventional myosin-Vb OS=Homo sapiens OX=9606 GN=MYO5B PE=1 SV=1                                         | 319,1  | 10 |
| 378 | Q9H0H5 | RGAP1_HUMAN Rac GTPase-activating protein 1 OS=Homo sapiens OX=9606 GN=RAC1 PE=1 SV=1                                   | 253,33 | 10 |
| 379 | P60228 | EIF3E_HUMAN Eukaryotic translation initiation factor 3 subunit E OS=Homo sapiens OX=9606 GN=EIF3E PE=1 SV=1             | 198,81 | 10 |
| 380 | Q9HCM1 | K1551_HUMAN Uncharacterized protein KIAA1551 OS=Homo sapiens OX=9606 GN=K1551 PE=1 SV=1                                 | 268,45 | 10 |
| 381 | Q15124 | PGM5_HUMAN Phosphoglucomutase-like protein 5 OS=Homo sapiens OX=9606 GN=PGM5 PE=1 SV=1                                  | 228,14 | 10 |
| 382 | Q9BPZ2 | SPI2B_HUMAN Spindlin-2B OS=Homo sapiens OX=9606 GN=SPIN2B PE=1 SV=1                                                     | 259,05 | 10 |
| 383 | Q96I24 | FUBP3_HUMAN Far upstream element-binding protein 3 OS=Homo sapiens OX=9606 GN=FUBP3 PE=1 SV=1                           | 325,79 | 10 |
| 384 | Q9H6S0 | YTDC2_HUMAN Probable ATP-dependent RNA helicase YTHDC2 OS=Homo sapiens OX=9606 GN=YTDC2 PE=1 SV=1                       | 395,02 | 10 |
| 385 | Q7Z6B0 | CCD91_HUMAN Coiled-coil domain-containing protein 91 OS=Homo sapiens OX=9606 GN=CCD91 PE=1 SV=1                         | 377,65 | 10 |
| 386 | P50148 | GNAQ_HUMAN Guanine nucleotide-binding protein G(q) subunit alpha OS=Homo sapiens OX=9606 GN=GNAQ PE=1 SV=1              | 312,05 | 10 |
| 387 | O95168 | NDUB4_HUMAN NADH dehydrogenase [ubiquinone] 1 beta subcomplex subunit 4 OS=Homo sapiens OX=9606 GN=NDUB4 PE=1 SV=1      | 178,54 | 10 |
| 388 | Q9BPX5 | ARP5L_HUMAN Actin-related protein 2/3 complex subunit 5-like protein OS=Homo sapiens OX=9606 GN=ARP5L PE=1 SV=1         | 447,78 | 10 |
| 389 | Q9H3K6 | BOLA2_HUMAN Bola-like protein 2 OS=Homo sapiens OX=9606 GN=BOLA2 PE=1 SV=1                                              | 508,34 | 10 |
| 390 | Q14376 | GALE_HUMAN UDP-glucose 4-epimerase OS=Homo sapiens OX=9606 GN=GALE PE=1 SV=1                                            | 333,31 | 10 |
| 391 | Q8TAD7 | OCC1_HUMAN Overexpressed in colon carcinoma 1 protein OS=Homo sapiens OX=9606 GN=OCC1 PE=1 SV=1                         | 834,77 | 10 |

|     |        |                                                                                 |        |    |
|-----|--------|---------------------------------------------------------------------------------|--------|----|
| 392 | Q9BWD1 | THIC_HUMAN Acetyl-CoA acetyltransferase_ cytosolic OS=Homo sapiens OX=9606 GN   | 264,62 | 10 |
| 393 | Q5JR59 | MTUS2_HUMAN Microtubule-associated tumor suppressor candidate 2 OS=Homo sap     | 279,38 | 10 |
| 394 | Q96KT0 | FAAS1_HUMAN Uncharacterized protein FAM167A-AS1 OS=Homo sapiens OX=9606 G       | 237,64 | 10 |
| 395 | Q16531 | DDB1_HUMAN DNA damage-binding protein 1 OS=Homo sapiens OX=9606 GN=DDB1         | 199,3  | 10 |
| 396 | Q16890 | TPD53_HUMAN Tumor protein D53 OS=Homo sapiens OX=9606 GN=TPD52L1 PE=1 SV        | 271,5  | 10 |
| 397 | P46926 | GNPI1_HUMAN Glucosamine-6-phosphate isomerase 1 OS=Homo sapiens OX=9606 G       | 172,55 | 10 |
| 398 | P60891 | PRPS1_HUMAN Ribose-phosphate pyrophosphokinase 1 OS=Homo sapiens OX=9606 (      | 611,71 | 10 |
| 399 | Q9UM07 | PADI4_HUMAN Protein-arginine deiminase type-4 OS=Homo sapiens OX=9606 GN=PA     | 377,65 | 10 |
| 400 | Q86TI0 | TBCD1_HUMAN TBC1 domain family member 1 OS=Homo sapiens OX=9606 GN=TBC1         | 251,55 | 10 |
| 401 | Q16878 | CDO1_HUMAN Cysteine dioxygenase type 1 OS=Homo sapiens OX=9606 GN=CDO1 PE       | 154,39 | 10 |
| 402 | O43491 | E41L2_HUMAN Band 4.1-like protein 2 OS=Homo sapiens OX=9606 GN=EPB41L2 PE=1     | 231,46 | 10 |
| 403 | Q9H9S3 | S61A2_HUMAN Protein transport protein Sec61 subunit alpha isoform 2 OS=Homo sa  | 216,12 | 10 |
| 404 | Q13243 | SRSF5_HUMAN Serine/arginine-rich splicing factor 5 OS=Homo sapiens OX=9606 GN=9 | 185,09 | 10 |
| 405 | Q496Y0 | LONF3_HUMAN LON peptidase N-terminal domain and RING finger protein 3 OS=Horr   | 277,35 | 10 |
| 406 | P22061 | PIMT_HUMAN Protein-L-isoaspartate(D-aspartate) O-methyltransferase OS=Homo sa   | 527,38 | 10 |
| 407 | Q5JTV8 | TOIP1_HUMAN Torsin-1A-interacting protein 1 OS=Homo sapiens OX=9606 GN=TOR1,    | 218,34 | 10 |
| 408 | Q9NUU7 | DD19A_HUMAN ATP-dependent RNA helicase DDX19A OS=Homo sapiens OX=9606 GI        | 158,83 | 10 |
| 409 | Q4V328 | GRAP1_HUMAN GRIP1-associated protein 1 OS=Homo sapiens OX=9606 GN=GRIPAP1       | 234,54 | 10 |
| 410 | Q9UBX3 | DIC_HUMAN Mitochondrial dicarboxylate carrier OS=Homo sapiens OX=9606 GN=SLC:   | 446,49 | 10 |
| 411 | Q13586 | STIM1_HUMAN Stromal interaction molecule 1 OS=Homo sapiens OX=9606 GN=STIM:     | 361,86 | 10 |
| 412 | Q86TE4 | LUZP2_HUMAN Leucine zipper protein 2 OS=Homo sapiens OX=9606 GN=LUZP2 PE=2      | 900,56 | 10 |
| 413 | Q8IZ21 | PHAR4_HUMAN Phosphatase and actin regulator 4 OS=Homo sapiens OX=9606 GN=PI     | 163,64 | 10 |
| 414 | Q9Y6R4 | M3K4_HUMAN Mitogen-activated protein kinase kinase kinase 4 OS=Homo sapiens O   | 153,53 | 10 |
| 415 | P00966 | ASSY_HUMAN Argininosuccinate synthase OS=Homo sapiens OX=9606 GN=ASS1 PE=1      | 166,26 | 10 |
| 416 | P49257 | LMAN1_HUMAN Protein ERGIC-53 OS=Homo sapiens OX=9606 GN=LMAN1 PE=1 SV=2         | 203,15 | 10 |
| 417 | P05161 | ISG15_HUMAN Ubiquitin-like protein ISG15 OS=Homo sapiens OX=9606 GN=ISG15 PE:   | 358,66 | 10 |
| 418 | P61923 | COPZ1_HUMAN Coatomer subunit zeta-1 OS=Homo sapiens OX=9606 GN=COPZ1 PE=:       | 385,42 | 10 |
| 419 | P52948 | NUP98_HUMAN Nuclear pore complex protein Nup98-Nup96 OS=Homo sapiens OX=9       | 201,87 | 10 |
| 420 | O95433 | AHSA1_HUMAN Activator of 90 kDa heat shock protein ATPase homolog 1 OS=Homo s   | 568,45 | 10 |
| 421 | P15586 | GNS_HUMAN N-acetylglucosamine-6-sulfatase OS=Homo sapiens OX=9606 GN=GNS P      | 471,22 | 10 |
| 422 | Q13206 | DDX10_HUMAN Probable ATP-dependent RNA helicase DDX10 OS=Homo sapiens OX=       | 317,02 | 10 |

|     |        |                                                                                    |         |      |
|-----|--------|------------------------------------------------------------------------------------|---------|------|
| 423 | P14136 | GFAP_HUMAN Glial fibrillary acidic protein OS=Homo sapiens OX=9606 GN=GFAP PE=     | 647,74  | 10   |
| 424 | P61916 | NPC2_HUMAN NPC intracellular cholesterol transporter 2 OS=Homo sapiens OX=9606     | 844,7   | 10   |
| 425 | P50402 | EMD_HUMAN Emerin OS=Homo sapiens OX=9606 GN=EMD PE=1 SV=1                          | 236,46  | 10   |
| 426 | O76021 | RL1D1_HUMAN Ribosomal L1 domain-containing protein 1 OS=Homo sapiens OX=960        | 271,54  | 10   |
| 427 | P07686 | HEXB_HUMAN Beta-hexosaminidase subunit beta OS=Homo sapiens OX=9606 GN=HE          | 431,63  | 10   |
| 428 | Q9NUQ6 | SPS2L_HUMAN SPATS2-like protein OS=Homo sapiens OX=9606 GN=SPATS2L PE=1 SV:        | 135,83  | 10   |
| 429 | Q96HE7 | ERO1A_HUMAN ERO1-like protein alpha OS=Homo sapiens OX=9606 GN=ERO1A PE=1          | 277,4   | 10   |
| 430 | P07316 | CRGB_HUMAN Gamma-crystallin B OS=Homo sapiens OX=9606 GN=CRYGB PE=1 SV=3           | 264,81  | 10   |
| 431 | Q9UBT2 | SAE2_HUMAN SUMO-activating enzyme subunit 2 OS=Homo sapiens OX=9606 GN=UE          | 262,36  | 10   |
| 432 | Q99551 | MTEF1_HUMAN Transcription termination factor 1_ mitochondrial OS=Homo sapiens      | 337,68  | 10   |
| 433 | P61601 | NCALD_HUMAN Neurocalcin-delta OS=Homo sapiens OX=9606 GN=NCALD PE=1 SV=2           | 286,7   | 6,55 |
| 434 | O76003 | GLRX3_HUMAN Glutaredoxin-3 OS=Homo sapiens OX=9606 GN=GLRX3 PE=1 SV=2              | 243,26  | 3,16 |
| 435 | P30043 | BLVRB_HUMAN Flavin reductase (NADPH) OS=Homo sapiens OX=9606 GN=BLVRB PE=          | 214,72  | 2,83 |
| 436 | Q6DRA6 | H2B2D_HUMAN Putative histone H2B type 2-D OS=Homo sapiens OX=9606 GN=HIST2         | 344,48  | 2,66 |
| 437 | Q6IS14 | IF5AL_HUMAN Eukaryotic translation initiation factor 5A-1-like OS=Homo sapiens OX= | 264,34  | 2,64 |
| 438 | Q6DN03 | H2B2C_HUMAN Putative histone H2B type 2-C OS=Homo sapiens OX=9606 GN=HIST2I        | 344,48  | 2,61 |
| 439 | P02795 | MT2_HUMAN Metallothionein-2 OS=Homo sapiens OX=9606 GN=MT2A PE=1 SV=1              | 5904,11 | 2,59 |
| 440 | P04732 | MT1E_HUMAN Metallothionein-1E OS=Homo sapiens OX=9606 GN=MT1E PE=1 SV=1            | 5904,11 | 2,51 |
| 441 | P49419 | AL7A1_HUMAN Alpha-amino adipic semialdehyde dehydrogenase OS=Homo sapiens C        | 191,17  | 2,48 |
| 442 | P13640 | MT1G_HUMAN Metallothionein-1G OS=Homo sapiens OX=9606 GN=MT1G PE=1 SV=2            | 5904,11 | 2,46 |
| 443 | P80297 | MT1X_HUMAN Metallothionein-1X OS=Homo sapiens OX=9606 GN=MT1X PE=1 SV=1            | 5904,11 | 2,46 |
| 444 | P30626 | SORCN_HUMAN Sorcin OS=Homo sapiens OX=9606 GN=SRI PE=1 SV=1                        | 271,97  | 2,46 |
| 445 | P0CG47 | UBB_HUMAN Polyubiquitin-B OS=Homo sapiens OX=9606 GN=UBB PE=1 SV=1                 | 4820,3  | 2,41 |
| 446 | Q8N339 | MT1M_HUMAN Metallothionein-1M OS=Homo sapiens OX=9606 GN=MT1M PE=3 SV:             | 5904,11 | 2,41 |
| 447 | P02786 | TFR1_HUMAN Transferrin receptor protein 1 OS=Homo sapiens OX=9606 GN=TFRC PE       | 215,99  | 2,41 |
| 448 | P62987 | RL40_HUMAN Ubiquitin-60S ribosomal protein L40 OS=Homo sapiens OX=9606 GN=U        | 4820,3  | 2,39 |
| 449 | P62979 | RS27A_HUMAN Ubiquitin-40S ribosomal protein S27a OS=Homo sapiens OX=9606 GN        | 4820,3  | 2,36 |
| 450 | P0CG48 | UBC_HUMAN Polyubiquitin-C OS=Homo sapiens OX=9606 GN=UBC PE=1 SV=3                 | 4820,3  | 2,36 |
| 451 | P07108 | ACBP_HUMAN Acyl-CoA-binding protein OS=Homo sapiens OX=9606 GN=DBI PE=1 SV:        | 336,57  | 2,27 |
| 452 | Q9UBL6 | CPNE7_HUMAN Copine-7 OS=Homo sapiens OX=9606 GN=CPNE7 PE=1 SV=1                    | 460,1   | 2,25 |
| 453 | P23381 | SYWC_HUMAN Tryptophan--tRNA ligase_ cytoplasmic OS=Homo sapiens OX=9606 GN         | 238,84  | 2,23 |

|     |        |                                                                                      |         |      |
|-----|--------|--------------------------------------------------------------------------------------|---------|------|
| 454 | P09874 | PARP1_HUMAN Poly [ADP-ribose] polymerase 1 OS=Homo sapiens OX=9606 GN=PARP1          | 241,55  | 2,23 |
| 455 | Q9Y265 | RUVB1_HUMAN RuvB-like 1 OS=Homo sapiens OX=9606 GN=RUVBL1 PE=1 SV=1                  | 261,97  | 2,16 |
| 456 | P63241 | IF5A1_HUMAN Eukaryotic translation initiation factor 5A-1 OS=Homo sapiens OX=9606    | 221,02  | 2,10 |
| 457 | P49841 | GSK3B_HUMAN Glycogen synthase kinase-3 beta OS=Homo sapiens OX=9606 GN=GSK3B         | 212,94  | 2,10 |
| 458 | P04626 | ERBB2_HUMAN Receptor tyrosine-protein kinase erbB-2 OS=Homo sapiens OX=9606 GN=ERBB2 | 179,71  | 2,08 |
| 459 | Q96JA4 | M4A14_HUMAN Membrane-spanning 4-domains subfamily A member 14 OS=Homo sapiens        | 217,6   | 2,08 |
| 460 | O00764 | PDXK_HUMAN Pyridoxal kinase OS=Homo sapiens OX=9606 GN=PDXK PE=1 SV=1                | 343,51  | 2,05 |
| 461 | P56537 | IF6_HUMAN Eukaryotic translation initiation factor 6 OS=Homo sapiens OX=9606 GN=IF6  | 471,45  | 2,03 |
| 462 | O95336 | 6PGL_HUMAN 6-phosphogluconolactonase OS=Homo sapiens OX=9606 GN=PGLS PE=1 SV=1       | 254,02  | 2,03 |
| 463 | O60664 | PLIN3_HUMAN Perilipin-3 OS=Homo sapiens OX=9606 GN=PLIN3 PE=1 SV=3                   | 251,48  | 1,99 |
| 464 | P07858 | CATB_HUMAN Cathepsin B OS=Homo sapiens OX=9606 GN=CTSB PE=1 SV=3                     | 225,8   | 1,97 |
| 465 | P13489 | RINI_HUMAN Ribonuclease inhibitor OS=Homo sapiens OX=9606 GN=RNH1 PE=1 SV=2          | 262,78  | 1,97 |
| 466 | P30740 | ILEU_HUMAN Leukocyte elastase inhibitor OS=Homo sapiens OX=9606 GN=SERPINB1          | 336,47  | 1,95 |
| 467 | Q99733 | NP1L4_HUMAN Nucleosome assembly protein 1-like 4 OS=Homo sapiens OX=9606 GN=NP1L4    | 249,48  | 1,93 |
| 468 | O95571 | ETHE1_HUMAN Persulfide dioxygenase ETHE1_ mitochondrial OS=Homo sapiens OX=9606      | 203,17  | 1,93 |
| 469 | P63208 | SKP1_HUMAN S-phase kinase-associated protein 1 OS=Homo sapiens OX=9606 GN=SKP1       | 410,8   | 1,90 |
| 470 | P50453 | SPB9_HUMAN Serpin B9 OS=Homo sapiens OX=9606 GN=SERPINB9 PE=1 SV=1                   | 223,46  | 1,90 |
| 471 | P61604 | CH10_HUMAN 10 kDa heat shock protein_ mitochondrial OS=Homo sapiens OX=9606          | 4066,88 | 1,88 |
| 472 | P54709 | AT1B3_HUMAN Sodium/potassium-transporting ATPase subunit beta-3 OS=Homo sapiens      | 280,96  | 1,88 |
| 473 | P10768 | ESTD_HUMAN S-formylglutathione hydrolase OS=Homo sapiens OX=9606 GN=ESD PE=1 SV=1    | 923,95  | 1,86 |
| 474 | P40121 | CAPG_HUMAN Macrophage-capping protein OS=Homo sapiens OX=9606 GN=CAPG PE=1 SV=1      | 1032,9  | 1,84 |
| 475 | O15427 | MOT4_HUMAN Monocarboxylate transporter 4 OS=Homo sapiens OX=9606 GN=SLC1A10          | 297,36  | 1,84 |
| 476 | Q58FF6 | H90B4_HUMAN Putative heat shock protein HSP 90-beta 4 OS=Homo sapiens OX=9606        | 2526,77 | 1,82 |
| 477 | P54819 | KAD2_HUMAN Adenylate kinase 2_ mitochondrial OS=Homo sapiens OX=9606 GN=AK2          | 281,78  | 1,82 |
| 478 | P61513 | RL37A_HUMAN 60S ribosomal protein L37a OS=Homo sapiens OX=9606 GN=RPL37A F           | 228,2   | 1,82 |
| 479 | O75368 | SH3L1_HUMAN SH3 domain-binding glutamic acid-rich-like protein OS=Homo sapiens       | 525,72  | 1,80 |
| 480 | O00487 | PSDE_HUMAN 26S proteasome non-ATPase regulatory subunit 14 OS=Homo sapiens           | 242,84  | 1,80 |
| 481 | P27482 | CALL3_HUMAN Calmodulin-like protein 3 OS=Homo sapiens OX=9606 GN=CALML3 PE=1 SV=1    | 263,21  | 1,79 |
| 482 | P20700 | LMNB1_HUMAN Lamin-B1 OS=Homo sapiens OX=9606 GN=LMNB1 PE=1 SV=2                      | 251,72  | 1,79 |
| 483 | Q07960 | RHG01_HUMAN Rho GTPase-activating protein 1 OS=Homo sapiens OX=9606 GN=ARHGAP1       | 295,16  | 1,77 |
| 484 | P63220 | RS21_HUMAN 40S ribosomal protein S21 OS=Homo sapiens OX=9606 GN=RPS21 PE=1 SV=1      | 688,2   | 1,77 |



|     |        |                                                                                                               |         |      |
|-----|--------|---------------------------------------------------------------------------------------------------------------|---------|------|
| 485 | Q58FG0 | HS905_HUMAN Putative heat shock protein HSP 90-alpha A5 OS=Homo sapiens OX=9606 GN=HS905 PE=1 SV=1            | 1293,33 | 1,75 |
| 486 | P84098 | RL19_HUMAN 60S ribosomal protein L19 OS=Homo sapiens OX=9606 GN=RPL19 PE=1 SV=1                               | 688,13  | 1,75 |
| 487 | Q9UKA9 | PTBP2_HUMAN Polypyrimidine tract-binding protein 2 OS=Homo sapiens OX=9606 GN=PTBP2 PE=1 SV=1                 | 266,89  | 1,75 |
| 488 | Q08211 | DHX9_HUMAN ATP-dependent RNA helicase A OS=Homo sapiens OX=9606 GN=DHX9 PE=1 SV=1                             | 243,25  | 1,73 |
| 489 | P00491 | PNPH_HUMAN Purine nucleoside phosphorylase OS=Homo sapiens OX=9606 GN=PNP PE=1 SV=1                           | 553,65  | 1,73 |
| 490 | P32320 | CDD_HUMAN Cytidine deaminase OS=Homo sapiens OX=9606 GN=CDA PE=1 SV=2                                         | 671,76  | 1,73 |
| 491 | P00403 | COX2_HUMAN Cytochrome c oxidase subunit 2 OS=Homo sapiens OX=9606 GN=MT-C2 PE=1 SV=1                          | 227,73  | 1,73 |
| 492 | P25786 | PSA1_HUMAN Proteasome subunit alpha type-1 OS=Homo sapiens OX=9606 GN=PSM1 PE=1 SV=1                          | 490,62  | 1,72 |
| 493 | Q15181 | IPYR_HUMAN Inorganic pyrophosphatase OS=Homo sapiens OX=9606 GN=PPA1 PE=1 SV=1                                | 219,72  | 1,72 |
| 494 | P51858 | HDGF_HUMAN Hepatoma-derived growth factor OS=Homo sapiens OX=9606 GN=HDGF PE=1 SV=1                           | 740,35  | 1,72 |
| 495 | Q96L46 | CPNS2_HUMAN Calpain small subunit 2 OS=Homo sapiens OX=9606 GN=CAPNS2 PE=2 SV=1                               | 406,65  | 1,72 |
| 496 | P30505 | 1C08_HUMAN HLA class I histocompatibility antigen_ Cw-8 alpha chain OS=Homo sapiens OX=9606 GN=1C08 PE=1 SV=1 | 236,09  | 1,70 |
| 497 | P11766 | ADHX_HUMAN Alcohol dehydrogenase class-3 OS=Homo sapiens OX=9606 GN=ADH5 PE=1 SV=1                            | 609,38  | 1,70 |
| 498 | P26639 | SYTC_HUMAN Threonine--tRNA ligase_ cytoplasmic OS=Homo sapiens OX=9606 GN=SYTC PE=1 SV=1                      | 207,97  | 1,70 |
| 499 | O15144 | ARPC2_HUMAN Actin-related protein 2/3 complex subunit 2 OS=Homo sapiens OX=9606 GN=ARPC2 PE=1 SV=1            | 216,54  | 1,70 |
| 500 | P43487 | RANG_HUMAN Ran-specific GTPase-activating protein OS=Homo sapiens OX=9606 GN=RANG PE=1 SV=1                   | 612,67  | 1,70 |
| 501 | P17081 | RHOQ_HUMAN Rho-related GTP-binding protein RhoQ OS=Homo sapiens OX=9606 GN=RHOQ PE=1 SV=1                     | 426,89  | 1,68 |
| 502 | O00232 | PSD12_HUMAN 26S proteasome non-ATPase regulatory subunit 12 OS=Homo sapiens OX=9606 GN=PSD12 PE=1 SV=1        | 190,34  | 1,68 |
| 503 | P49368 | TCPG_HUMAN T-complex protein 1 subunit gamma OS=Homo sapiens OX=9606 GN=TCPG PE=1 SV=1                        | 989,03  | 1,68 |
| 504 | P62854 | RS26_HUMAN 40S ribosomal protein S26 OS=Homo sapiens OX=9606 GN=RPS26 PE=1 SV=1                               | 714,86  | 1,67 |
| 505 | P84095 | RHOG_HUMAN Rho-related GTP-binding protein RhoG OS=Homo sapiens OX=9606 GN=RHOG PE=1 SV=1                     | 426,89  | 1,67 |
| 506 | P10321 | 1C07_HUMAN HLA class I histocompatibility antigen_ Cw-7 alpha chain OS=Homo sapiens OX=9606 GN=1C07 PE=1 SV=1 | 236,09  | 1,67 |
| 507 | Q5JNZ5 | RS26L_HUMAN Putative 40S ribosomal protein S26-like 1 OS=Homo sapiens OX=9606 GN=RS26L PE=1 SV=1              | 426,72  | 1,67 |
| 508 | P62330 | ARF6_HUMAN ADP-ribosylation factor 6 OS=Homo sapiens OX=9606 GN=ARF6 PE=1 SV=1                                | 281,75  | 1,65 |
| 509 | P27695 | APEX1_HUMAN DNA-(apurinic or apyrimidinic site) lyase OS=Homo sapiens OX=9606 GN=APEX1 PE=1 SV=1              | 871,4   | 1,65 |
| 510 | P16152 | CBR1_HUMAN Carbonyl reductase [NADPH] 1 OS=Homo sapiens OX=9606 GN=CBR1 PE=1 SV=1                             | 1470,5  | 1,65 |
| 511 | Q92945 | FUBP2_HUMAN Far upstream element-binding protein 2 OS=Homo sapiens OX=9606 GN=FUBP2 PE=1 SV=1                 | 286,66  | 1,65 |
| 512 | Q9TNN7 | 1C05_HUMAN HLA class I histocompatibility antigen_ Cw-5 alpha chain OS=Homo sapiens OX=9606 GN=1C05 PE=1 SV=1 | 236,09  | 1,65 |
| 513 | P62333 | PRS10_HUMAN 26S proteasome regulatory subunit 10B OS=Homo sapiens OX=9606 GN=PRS10 PE=1 SV=1                  | 262,82  | 1,63 |
| 514 | P14868 | SYDC_HUMAN Aspartate--tRNA ligase_ cytoplasmic OS=Homo sapiens OX=9606 GN=SYDC PE=1 SV=1                      | 295,07  | 1,63 |
| 515 | Q96FQ6 | S10AG_HUMAN Protein S100-A16 OS=Homo sapiens OX=9606 GN=S100A16 PE=1 SV=1                                     | 3769,79 | 1,63 |

|     |        |                                                                                                       |         |      |
|-----|--------|-------------------------------------------------------------------------------------------------------|---------|------|
| 516 | Q9Y230 | RUVB2_HUMAN RuvB-like 2 OS=Homo sapiens OX=9606 GN=RUVBL2 PE=1 SV=3                                   | 258,62  | 1,63 |
| 517 | Q58FF7 | H90B3_HUMAN Putative heat shock protein HSP 90-beta-3 OS=Homo sapiens OX=9606 GN=H90B3 PE=1 SV=3      | 3517,47 | 1,62 |
| 518 | P18077 | RL35A_HUMAN 60S ribosomal protein L35a OS=Homo sapiens OX=9606 GN=RPL35A PE=1 SV=3                    | 327,22  | 1,62 |
| 519 | P10599 | THIO_HUMAN Thioredoxin OS=Homo sapiens OX=9606 GN=TXN PE=1 SV=3                                       | 2512,85 | 1,62 |
| 520 | O60493 | SNX3_HUMAN Sorting nexin-3 OS=Homo sapiens OX=9606 GN=SNX3 PE=1 SV=3                                  | 440,39  | 1,62 |
| 521 | Q99584 | S10AD_HUMAN Protein S100-A13 OS=Homo sapiens OX=9606 GN=S100A13 PE=1 SV=3                             | 397,6   | 1,62 |
| 522 | Q9ULV4 | COR1C_HUMAN Coronin-1C OS=Homo sapiens OX=9606 GN=CORO1C PE=1 SV=1                                    | 289,68  | 1,62 |
| 523 | Q16543 | CDC37_HUMAN Hsp90 co-chaperone Cdc37 OS=Homo sapiens OX=9606 GN=CDC37 PE=1 SV=3                       | 221,3   | 1,62 |
| 524 | O43242 | PSMD3_HUMAN 26S proteasome non-ATPase regulatory subunit 3 OS=Homo sapiens OX=9606 GN=PSMD3 PE=1 SV=3 | 168,22  | 1,62 |
| 525 | P31930 | QCR1_HUMAN Cytochrome b-c1 complex subunit 1_ mitochondrial OS=Homo sapiens OX=9606 GN=QCR1 PE=1 SV=3 | 433,65  | 1,62 |
| 526 | P07602 | SAP_HUMAN Prosaposin OS=Homo sapiens OX=9606 GN=PSAP PE=1 SV=2                                        | 422,16  | 1,60 |
| 527 | P40926 | MDHM_HUMAN Malate dehydrogenase_ mitochondrial OS=Homo sapiens OX=9606 GN=MDHM PE=1 SV=3              | 1337,68 | 1,60 |
| 528 | Q04760 | LGUL_HUMAN Lactoylglutathione lyase OS=Homo sapiens OX=9606 GN=GLO1 PE=1 SV=3                         | 962,21  | 1,60 |
| 529 | O00299 | CLIC1_HUMAN Chloride intracellular channel protein 1 OS=Homo sapiens OX=9606 GN=CLIC1 PE=1 SV=3       | 943,31  | 1,60 |
| 530 | Q9H4E5 | RHOJ_HUMAN Rho-related GTP-binding protein RhoJ OS=Homo sapiens OX=9606 GN=RHOJ PE=1 SV=3             | 426,89  | 1,60 |
| 531 | P05386 | RLA1_HUMAN 60S acidic ribosomal protein P1 OS=Homo sapiens OX=9606 GN=RPLP1 PE=1 SV=3                 | 2406,26 | 1,60 |
| 532 | P78330 | SERP1_HUMAN Phosphoserine phosphatase OS=Homo sapiens OX=9606 GN=PSPH PE=1 SV=3                       | 607,21  | 1,58 |
| 533 | P30044 | PRDX5_HUMAN Peroxiredoxin-5_ mitochondrial OS=Homo sapiens OX=9606 GN=PRDX5 PE=1 SV=3                 | 913,12  | 1,58 |
| 534 | P60953 | CDC42_HUMAN Cell division control protein 42 homolog OS=Homo sapiens OX=9606 GN=CDC42 PE=1 SV=3       | 1122,52 | 1,58 |
| 535 | P28066 | PSA5_HUMAN Proteasome subunit alpha type-5 OS=Homo sapiens OX=9606 GN=PSMA5 PE=1 SV=3                 | 282,03  | 1,58 |
| 536 | Q01130 | SRSF2_HUMAN Serine/arginine-rich splicing factor 2 OS=Homo sapiens OX=9606 GN=SRSF2 PE=1 SV=3         | 2421,12 | 1,57 |
| 537 | P00441 | SODC_HUMAN Superoxide dismutase [Cu-Zn] OS=Homo sapiens OX=9606 GN=SOD1 PE=1 SV=3                     | 1146,76 | 1,57 |
| 538 | Q14764 | MVP_HUMAN Major vault protein OS=Homo sapiens OX=9606 GN=MVP PE=1 SV=4                                | 364,04  | 1,57 |
| 539 | Q96KP4 | CNDP2_HUMAN Cytosolic non-specific dipeptidase OS=Homo sapiens OX=9606 GN=CNDP2 PE=1 SV=3             | 395,02  | 1,57 |
| 540 | P07339 | CATD_HUMAN Cathepsin D OS=Homo sapiens OX=9606 GN=CTSD PE=1 SV=1                                      | 1804,98 | 1,57 |
| 541 | P05787 | K2C8_HUMAN Keratin_ type II cytoskeletal 8 OS=Homo sapiens OX=9606 GN=KRT8 PE=1 SV=3                  | 904,65  | 1,55 |
| 542 | P36406 | TRIM23_HUMAN E3 ubiquitin-protein ligase TRIM23 OS=Homo sapiens OX=9606 GN=TRIM23 PE=1 SV=3           | 209,88  | 1,55 |
| 543 | P09104 | ENOG_HUMAN Gamma-enolase OS=Homo sapiens OX=9606 GN=ENO2 PE=1 SV=3                                    | 1184,8  | 1,55 |
| 544 | P0DN37 | PAL4G_HUMAN Peptidyl-prolyl cis-trans isomerase A-like 4G OS=Homo sapiens OX=9606 GN=PAL4G PE=1 SV=3  | 608,22  | 1,55 |
| 545 | Q6NZI2 | CAVN1_HUMAN Caveolae-associated protein 1 OS=Homo sapiens OX=9606 GN=CAVIN1 PE=1 SV=3                 | 832,94  | 1,55 |
| 546 | P60900 | PSA6_HUMAN Proteasome subunit alpha type-6 OS=Homo sapiens OX=9606 GN=PSMA6 PE=1 SV=3                 | 919,94  | 1,55 |

|     |            |                                                                                                                |         |      |
|-----|------------|----------------------------------------------------------------------------------------------------------------|---------|------|
| 547 | Q9NVA2     | SEP11_HUMAN Septin-11 OS=Homo sapiens OX=9606 GN=SEPT11 PE=1 SV=3                                              | 390,66  | 1,55 |
| 548 | A0A075B759 | PAL4E_HUMAN Peptidyl-prolyl cis-trans isomerase A-like 4E OS=Homo sapiens OX=9606 GN=PAL4E PE=1 SV=3           | 608,22  | 1,55 |
| 549 | P20073     | ANXA7_HUMAN Annexin A7 OS=Homo sapiens OX=9606 GN=ANXA7 PE=1 SV=3                                              | 396,24  | 1,55 |
| 550 | A8MTJ3     | GNAT3_HUMAN Guanine nucleotide-binding protein G(t) subunit alpha-3 OS=Homo sapiens OX=9606 GN=GNAT3 PE=1 SV=3 | 326,71  | 1,55 |
| 551 | P49458     | SRP09_HUMAN Signal recognition particle 9 kDa protein OS=Homo sapiens OX=9606 GN=SRP09 PE=1 SV=3               | 756,36  | 1,55 |
| 552 | P49448     | DHE4_HUMAN Glutamate dehydrogenase 2_ mitochondrial OS=Homo sapiens OX=9606 GN=DHE4 PE=1 SV=3                  | 217,21  | 1,54 |
| 553 | P49411     | EFTU_HUMAN Elongation factor Tu_ mitochondrial OS=Homo sapiens OX=9606 GN=EFTU PE=1 SV=3                       | 1357,26 | 1,54 |
| 554 | P32969     | RL9_HUMAN 60S ribosomal protein L9 OS=Homo sapiens OX=9606 GN=RPL9 PE=1 SV=3                                   | 806,68  | 1,54 |
| 555 | Q99714     | HCD2_HUMAN 3-hydroxyacyl-CoA dehydrogenase type-2 OS=Homo sapiens OX=9606 GN=HCD2 PE=1 SV=3                    | 581,49  | 1,54 |
| 556 | P06744     | G6PI_HUMAN Glucose-6-phosphate isomerase OS=Homo sapiens OX=9606 GN=GPI PE=1 SV=3                              | 437,8   | 1,54 |
| 557 | P19338     | NUCL_HUMAN Nucleolin OS=Homo sapiens OX=9606 GN=NCL PE=1 SV=3                                                  | 971,44  | 1,54 |
| 558 | O00148     | DX39A_HUMAN ATP-dependent RNA helicase DDX39A OS=Homo sapiens OX=9606 GN=DX39A PE=1 SV=3                       | 446,84  | 1,54 |
| 559 | P08754     | GNAI3_HUMAN Guanine nucleotide-binding protein G(k) subunit alpha OS=Homo sapiens OX=9606 GN=GNAI3 PE=1 SV=3   | 545,58  | 1,54 |
| 560 | P08708     | RS17_HUMAN 40S ribosomal protein S17 OS=Homo sapiens OX=9606 GN=RPS17 PE=1 SV=3                                | 1675,88 | 1,54 |
| 561 | P11488     | GNAT1_HUMAN Guanine nucleotide-binding protein G(t) subunit alpha-1 OS=Homo sapiens OX=9606 GN=GNAT1 PE=1 SV=3 | 361,11  | 1,54 |
| 562 | O75947     | ATP5H_HUMAN ATP synthase subunit d_ mitochondrial OS=Homo sapiens OX=9606 GN=ATP5H PE=1 SV=3                   | 1407,96 | 1,54 |
| 563 | P61956     | SUMO2_HUMAN Small ubiquitin-related modifier 2 OS=Homo sapiens OX=9606 GN=SUMO2 PE=1 SV=3                      | 2438,91 | 1,54 |
| 564 | P62633     | CNBP_HUMAN Cellular nucleic acid-binding protein OS=Homo sapiens OX=9606 GN=CNBP PE=1 SV=3                     | 542,37  | 1,54 |
| 565 | P13693     | TCTP_HUMAN Translationally-controlled tumor protein OS=Homo sapiens OX=9606 GN=TCTP PE=1 SV=3                  | 230,74  | 1,52 |
| 566 | P31939     | PUR9_HUMAN Bifunctional purine biosynthesis protein PURH OS=Homo sapiens OX=9606 GN=PUR9 PE=1 SV=3             | 388,72  | 1,52 |
| 567 | P78371     | TCPB_HUMAN T-complex protein 1 subunit beta OS=Homo sapiens OX=9606 GN=TCPB PE=1 SV=3                          | 292,77  | 1,52 |
| 568 | P51148     | RAB5C_HUMAN Ras-related protein Rab-5C OS=Homo sapiens OX=9606 GN=RAB5C PE=1 SV=3                              | 1289,98 | 1,52 |
| 569 | P52565     | GDIR1_HUMAN Rho GDP-dissociation inhibitor 1 OS=Homo sapiens OX=9606 GN=ARHGEF1 PE=1 SV=3                      | 2694,66 | 1,52 |
| 570 | Q9BRL6     | SRSF8_HUMAN Serine/arginine-rich splicing factor 8 OS=Homo sapiens OX=9606 GN=SRSF8 PE=1 SV=3                  | 2202,81 | 1,52 |
| 571 | P46779     | RL28_HUMAN 60S ribosomal protein L28 OS=Homo sapiens OX=9606 GN=RPL28 PE=1 SV=3                                | 1001,85 | 1,52 |
| 572 | Q9Y277     | VDAC3_HUMAN Voltage-dependent anion-selective channel protein 3 OS=Homo sapiens OX=9606 GN=VDAC3 PE=1 SV=3     | 840,04  | 1,52 |
| 573 | F5H284     | PAL4D_HUMAN Peptidyl-prolyl cis-trans isomerase A-like 4D OS=Homo sapiens OX=9606 GN=PAL4D PE=1 SV=3           | 608,22  | 1,52 |
| 574 | P08865     | RSSA_HUMAN 40S ribosomal protein SA OS=Homo sapiens OX=9606 GN=RPSA PE=1 SV=3                                  | 1838,09 | 1,52 |
| 575 | P05556     | ITB1_HUMAN Integrin beta-1 OS=Homo sapiens OX=9606 GN=ITGB1 PE=1 SV=2                                          | 393,14  | 1,52 |
| 576 | P52907     | CAZA1_HUMAN F-actin-capping protein subunit alpha-1 OS=Homo sapiens OX=9606 GN=CAZA1 PE=1 SV=3                 | 431,67  | 1,52 |
| 577 | P04632     | CPNS1_HUMAN Calpain small subunit 1 OS=Homo sapiens OX=9606 GN=CAPNS1 PE=1 SV=3                                | 439,71  | 1,52 |

|     |            |                                                                                         |         |      |
|-----|------------|-----------------------------------------------------------------------------------------|---------|------|
| 578 | P24539     | AT5F1_HUMAN ATP synthase F(0) complex subunit B1_ mitochondrial OS=Homo sapiens         | 211,53  | 1,52 |
| 579 | A0A0B4J2A2 | PAL4C_HUMAN Peptidyl-prolyl cis-trans isomerase A-like 4C OS=Homo sapiens OX=9606       | 608,22  | 1,51 |
| 580 | P00558     | PGK1_HUMAN Phosphoglycerate kinase 1 OS=Homo sapiens OX=9606 GN=PGK1 PE=1               | 2941,76 | 1,51 |
| 581 | P60763     | RAC3_HUMAN Ras-related C3 botulinum toxin substrate 3 OS=Homo sapiens OX=9606           | 702,34  | 1,51 |
| 582 | P50991     | TCPD_HUMAN T-complex protein 1 subunit delta OS=Homo sapiens OX=9606 GN=CCT             | 318,74  | 1,51 |
| 583 | P0DN26     | PAL4F_HUMAN Peptidyl-prolyl cis-trans isomerase A-like 4F OS=Homo sapiens OX=9606       | 608,22  | 1,51 |
| 584 | P30084     | ECHM_HUMAN Enoyl-CoA hydratase_ mitochondrial OS=Homo sapiens OX=9606 GN=               | 1048,87 | 1,51 |
| 585 | P14678     | RSMB_HUMAN Small nuclear ribonucleoprotein-associated proteins B and B' OS=Homo sapiens | 250,14  | 1,51 |
| 586 | P30456     | 1A43_HUMAN HLA class I histocompatibility antigen_ A-43 alpha chain OS=Homo sapiens     | 621,38  | 1,51 |
| 587 | P52597     | HNRPF_HUMAN Heterogeneous nuclear ribonucleoprotein F OS=Homo sapiens OX=9606           | 344,2   | 1,49 |
| 588 | P10316     | 1A69_HUMAN HLA class I histocompatibility antigen_ A-69 alpha chain OS=Homo sapiens     | 996,81  | 1,49 |
| 589 | Q9Y696     | CLIC4_HUMAN Chloride intracellular channel protein 4 OS=Homo sapiens OX=9606 GN=        | 803,7   | 1,49 |
| 590 | P35613     | BASI_HUMAN Basigin OS=Homo sapiens OX=9606 GN=BSG PE=1 SV=2                             | 407,65  | 1,49 |
| 591 | P30457     | 1A66_HUMAN HLA class I histocompatibility antigen_ A-66 alpha chain OS=Homo sapiens     | 775,21  | 1,49 |
| 592 | P30450     | 1A26_HUMAN HLA class I histocompatibility antigen_ A-26 alpha chain OS=Homo sapiens     | 621,38  | 1,49 |
| 593 | Q9UJZ1     | STML2_HUMAN Stomatin-like protein 2_ mitochondrial OS=Homo sapiens OX=9606 GN=          | 371,86  | 1,49 |
| 594 | P12429     | ANXA3_HUMAN Annexin A3 OS=Homo sapiens OX=9606 GN=ANXA3 PE=1 SV=3                       | 399,64  | 1,49 |
| 595 | P35232     | PHB_HUMAN Prohibitin OS=Homo sapiens OX=9606 GN=PHB PE=1 SV=1                           | 308,34  | 1,49 |
| 596 | P01892     | 1A02_HUMAN HLA class I histocompatibility antigen_ A-2 alpha chain OS=Homo sapiens      | 1022,85 | 1,49 |
| 597 | P01891     | 1A68_HUMAN HLA class I histocompatibility antigen_ A-68 alpha chain OS=Homo sapiens     | 1145,58 | 1,49 |
| 598 | P30086     | PEBP1_HUMAN Phosphatidylethanolamine-binding protein 1 OS=Homo sapiens OX=9606          | 2236,68 | 1,49 |
| 599 | P30048     | PRDX3_HUMAN Thioredoxin-dependent peroxide reductase_ mitochondrial OS=Homo sapiens     | 1702,64 | 1,49 |
| 600 | P61970     | NUTF2_HUMAN Nuclear transport factor 2 OS=Homo sapiens OX=9606 GN=NUTF2 PE=1            | 2614,22 | 1,49 |
| 601 | P15531     | NDKA_HUMAN Nucleoside diphosphate kinase A OS=Homo sapiens OX=9606 GN=NDKA              | 2998,41 | 1,48 |
| 602 | P61204     | ARF3_HUMAN ADP-ribosylation factor 3 OS=Homo sapiens OX=9606 GN=ARF3 PE=1 SV=1          | 2367,35 | 1,48 |
| 603 | P84077     | ARF1_HUMAN ADP-ribosylation factor 1 OS=Homo sapiens OX=9606 GN=ARF1 PE=1 SV=1          | 2424,22 | 1,48 |
| 604 | Q9UNX3     | RL26L_HUMAN 60S ribosomal protein L26-like 1 OS=Homo sapiens OX=9606 GN=RPL26L          | 498,12  | 1,48 |
| 605 | Q5TZA2     | CROCC_HUMAN Rootletin OS=Homo sapiens OX=9606 GN=CROCC PE=1 SV=1                        | 246,16  | 1,48 |
| 606 | P39023     | RL3_HUMAN 60S ribosomal protein L3 OS=Homo sapiens OX=9606 GN=RPL3 PE=1 SV=1            | 648,32  | 1,48 |
| 607 | P30459     | 1A74_HUMAN HLA class I histocompatibility antigen_ A-74 alpha chain OS=Homo sapiens     | 917,77  | 1,48 |
| 608 | P30453     | 1A34_HUMAN HLA class I histocompatibility antigen_ A-34 alpha chain OS=Homo sapiens     | 880,07  | 1,48 |

|     |        |                                                                                  |         |      |
|-----|--------|----------------------------------------------------------------------------------|---------|------|
| 609 | PODME0 | SETLP_HUMAN Protein SETSIP OS=Homo sapiens OX=9606 GN=SETSIP PE=1 SV=1           | 758,35  | 1,48 |
| 610 | O00231 | PSD11_HUMAN 26S proteasome non-ATPase regulatory subunit 11 OS=Homo sapiens      | 251,6   | 1,48 |
| 611 | P30050 | RL12_HUMAN 60S ribosomal protein L12 OS=Homo sapiens OX=9606 GN=RPL12 PE=1       | 1419,34 | 1,48 |
| 612 | P23526 | SAHH_HUMAN Adenosylhomocysteinase OS=Homo sapiens OX=9606 GN=AHCY PE=1           | 1124,45 | 1,48 |
| 613 | P04439 | 1A03_HUMAN HLA class I histocompatibility antigen_ A-3 alpha chain OS=Homo sapie | 812,91  | 1,48 |
| 614 | P13746 | 1A11_HUMAN HLA class I histocompatibility antigen_ A-11 alpha chain OS=Homo sapi | 786,87  | 1,48 |
| 615 | P0DP25 | CALM3_HUMAN Calmodulin-3 OS=Homo sapiens OX=9606 GN=CALM3 PE=1 SV=1              | 2082,95 | 1,48 |
| 616 | P26368 | U2AF2_HUMAN Splicing factor U2AF 65 kDa subunit OS=Homo sapiens OX=9606 GN=U     | 169,18  | 1,48 |
| 617 | O43396 | TXNL1_HUMAN Thioredoxin-like protein 1 OS=Homo sapiens OX=9606 GN=TXNL1 PE=      | 277,78  | 1,48 |
| 618 | Q07021 | C1QBP_HUMAN Complement component 1 Q subcomponent-binding protein_ mitoch        | 215,21  | 1,48 |
| 619 | Q14974 | IMB1_HUMAN Importin subunit beta-1 OS=Homo sapiens OX=9606 GN=KPNB1 PE=1 S       | 168,55  | 1,46 |
| 620 | P38646 | GRP75_HUMAN Stress-70 protein_ mitochondrial OS=Homo sapiens OX=9606 GN=HSI      | 2565,66 | 1,46 |
| 621 | Q15365 | PCBP1_HUMAN Poly(rC)-binding protein 1 OS=Homo sapiens OX=9606 GN=PCBP1 PE=      | 2230,75 | 1,46 |
| 622 | P18462 | 1A25_HUMAN HLA class I histocompatibility antigen_ A-25 alpha chain OS=Homo sapi | 621,38  | 1,46 |
| 623 | P07205 | PGK2_HUMAN Phosphoglycerate kinase 2 OS=Homo sapiens OX=9606 GN=PGK2 PE=1        | 614,34  | 1,46 |
| 624 | Q01105 | SET_HUMAN Protein SET OS=Homo sapiens OX=9606 GN=SET PE=1 SV=3                   | 1069,26 | 1,46 |
| 625 | P20339 | RAB5A_HUMAN Ras-related protein Rab-5A OS=Homo sapiens OX=9606 GN=RAB5A P        | 997,78  | 1,46 |
| 626 | P04843 | RPN1_HUMAN Dolichyl-diphosphooligosaccharide--protein glycosyltransferase subuni | 656,11  | 1,46 |
| 627 | P16189 | 1A31_HUMAN HLA class I histocompatibility antigen_ A-31 alpha chain OS=Homo sapi | 880,07  | 1,46 |
| 628 | Q14103 | HNRPD_HUMAN Heterogeneous nuclear ribonucleoprotein D0 OS=Homo sapiens OX=       | 1709,94 | 1,46 |
| 629 | P24752 | THIL_HUMAN Acetyl-CoA acetyltransferase_ mitochondrial OS=Homo sapiens OX=960    | 355,21  | 1,46 |
| 630 | P20618 | PSB1_HUMAN Proteasome subunit beta type-1 OS=Homo sapiens OX=9606 GN=PSME        | 405,4   | 1,46 |
| 631 | P30049 | ATPD_HUMAN ATP synthase subunit delta_ mitochondrial OS=Homo sapiens OX=9606     | 357,09  | 1,46 |
| 632 | P04899 | GNAI2_HUMAN Guanine nucleotide-binding protein G(i) subunit alpha-2 OS=Homo sa   | 454,57  | 1,46 |
| 633 | P63173 | RL38_HUMAN 60S ribosomal protein L38 OS=Homo sapiens OX=9606 GN=RPL38 PE=1       | 467,22  | 1,46 |
| 634 | P55209 | NP1L1_HUMAN Nucleosome assembly protein 1-like 1 OS=Homo sapiens OX=9606 GN      | 1019,5  | 1,45 |
| 635 | P30512 | 1A29_HUMAN HLA class I histocompatibility antigen_ A-29 alpha chain OS=Homo sapi | 726,24  | 1,45 |
| 636 | C9JRZ8 | AK1BF_HUMAN Aldo-keto reductase family 1 member B15 OS=Homo sapiens OX=960       | 534,68  | 1,45 |
| 637 | Q13740 | CD166_HUMAN CD166 antigen OS=Homo sapiens OX=9606 GN=ALCAM PE=1 SV=2             | 265,93  | 1,45 |
| 638 | P16190 | 1A33_HUMAN HLA class I histocompatibility antigen_ A-33 alpha chain OS=Homo sapi | 880,07  | 1,45 |
| 639 | P16188 | 1A30_HUMAN HLA class I histocompatibility antigen_ A-30 alpha chain OS=Homo sapi | 880,07  | 1,45 |

|     |        |                                                                                                                |         |      |
|-----|--------|----------------------------------------------------------------------------------------------------------------|---------|------|
| 640 | P0DP23 | CALM1_HUMAN Calmodulin-1 OS=Homo sapiens OX=9606 GN=CALM1 PE=1 SV=1                                            | 2082,95 | 1,45 |
| 641 | P62753 | RS6_HUMAN 40S ribosomal protein S6 OS=Homo sapiens OX=9606 GN=RPS6 PE=1 SV=1                                   | 1034,4  | 1,45 |
| 642 | Q14019 | COTL1_HUMAN Coactosin-like protein OS=Homo sapiens OX=9606 GN=COTL1 PE=1 SV=1                                  | 602,02  | 1,45 |
| 643 | P62942 | FKBP1A_HUMAN Peptidyl-prolyl cis-trans isomerase FKBP1A OS=Homo sapiens OX=9606 GN=FKBP1A PE=1 SV=1            | 1058,17 | 1,45 |
| 644 | O75131 | CPNE3_HUMAN Copine-3 OS=Homo sapiens OX=9606 GN=CPNE3 PE=1 SV=1                                                | 174,09  | 1,45 |
| 645 | P63096 | GNAI1_HUMAN Guanine nucleotide-binding protein G(i) subunit alpha-1 OS=Homo sapiens OX=9606 GN=GNAI1 PE=1 SV=1 | 391,58  | 1,45 |
| 646 | Q13310 | PABP4_HUMAN Polyadenylate-binding protein 4 OS=Homo sapiens OX=9606 GN=PABP4 PE=1 SV=1                         | 322,01  | 1,45 |
| 647 | P63162 | RSMN_HUMAN Small nuclear ribonucleoprotein-associated protein N OS=Homo sapiens OX=9606 GN=RSMN PE=1 SV=1      | 250,14  | 1,45 |
| 648 | P62495 | ERF1_HUMAN Eukaryotic peptide chain release factor subunit 1 OS=Homo sapiens OX=9606 GN=ERF1 PE=1 SV=1         | 205,35  | 1,45 |
| 649 | O75626 | PRDM1_HUMAN PR domain zinc finger protein 1 OS=Homo sapiens OX=9606 GN=PRDM1 PE=1 SV=1                         | 328,72  | 1,45 |
| 650 | O43776 | SYNC_HUMAN Asparagine--tRNA ligase_ cytoplasmic OS=Homo sapiens OX=9606 GN=SYNC PE=1 SV=1                      | 392,67  | 1,43 |
| 651 | P05455 | LA_HUMAN Lupus La protein OS=Homo sapiens OX=9606 GN=SSB PE=1 SV=2                                             | 504,56  | 1,43 |
| 652 | P31943 | HNRH1_HUMAN Heterogeneous nuclear ribonucleoprotein H OS=Homo sapiens OX=9606 GN=HNRH1 PE=1 SV=1               | 433,38  | 1,43 |
| 653 | P26006 | ITA3_HUMAN Integrin alpha-3 OS=Homo sapiens OX=9606 GN=ITGA3 PE=1 SV=5                                         | 689,33  | 1,43 |
| 654 | Q15366 | PCBP2_HUMAN Poly(rC)-binding protein 2 OS=Homo sapiens OX=9606 GN=PCBP2 PE=1 SV=1                              | 2315,47 | 1,43 |
| 655 | P09429 | HMGB1_HUMAN High mobility group protein B1 OS=Homo sapiens OX=9606 GN=HMGB1 PE=1 SV=1                          | 2429,55 | 1,43 |
| 656 | P00505 | AATM_HUMAN Aspartate aminotransferase_ mitochondrial OS=Homo sapiens OX=9606 GN=AATM PE=1 SV=1                 | 1532,07 | 1,43 |
| 657 | Q6EEV6 | SUMO4_HUMAN Small ubiquitin-related modifier 4 OS=Homo sapiens OX=9606 GN=SUMO4 PE=1 SV=1                      | 2438,91 | 1,43 |
| 658 | P21796 | VDAC1_HUMAN Voltage-dependent anion-selective channel protein 1 OS=Homo sapiens OX=9606 GN=VDAC1 PE=1 SV=1     | 1532,45 | 1,43 |
| 659 | P26583 | HMGB2_HUMAN High mobility group protein B2 OS=Homo sapiens OX=9606 GN=HMGB2 PE=1 SV=1                          | 2489,34 | 1,43 |
| 660 | P0DP24 | CALM2_HUMAN Calmodulin-2 OS=Homo sapiens OX=9606 GN=CALM2 PE=1 SV=1                                            | 2082,95 | 1,43 |
| 661 | P25398 | RS12_HUMAN 40S ribosomal protein S12 OS=Homo sapiens OX=9606 GN=RPS12 PE=1 SV=1                                | 2191,05 | 1,43 |
| 662 | Q16881 | TRXR1_HUMAN Thioredoxin reductase 1_ cytoplasmic OS=Homo sapiens OX=9606 GN=TRXR1 PE=1 SV=1                    | 297,5   | 1,43 |
| 663 | P27824 | CALX_HUMAN Calnexin OS=Homo sapiens OX=9606 GN=CANX PE=1 SV=2                                                  | 675,42  | 1,43 |
| 664 | P09496 | CLCA_HUMAN Clathrin light chain A OS=Homo sapiens OX=9606 GN=CLTA PE=1 SV=1                                    | 287     | 1,43 |
| 665 | P00367 | DHE3_HUMAN Glutamate dehydrogenase 1_ mitochondrial OS=Homo sapiens OX=9606 GN=DHE3 PE=1 SV=1                  | 303,48  | 1,43 |
| 666 | P61254 | RL26_HUMAN 60S ribosomal protein L26 OS=Homo sapiens OX=9606 GN=RPL26 PE=1 SV=1                                | 498,12  | 1,43 |
| 667 | Q96AE4 | FUBP1_HUMAN Far upstream element-binding protein 1 OS=Homo sapiens OX=9606 GN=FUBP1 PE=1 SV=1                  | 165,12  | 1,43 |
| 668 | P34932 | HSP74_HUMAN Heat shock 70 kDa protein 4 OS=Homo sapiens OX=9606 GN=HSPA4 PE=1 SV=1                             | 221,88  | 1,42 |
| 669 | Q13838 | DX39B_HUMAN Spliceosome RNA helicase DDX39B OS=Homo sapiens OX=9606 GN=DX39B PE=1 SV=1                         | 521,7   | 1,42 |
| 670 | P13667 | PDIA4_HUMAN Protein disulfide-isomerase A4 OS=Homo sapiens OX=9606 GN=PDIA4 PE=1 SV=1                          | 839,15  | 1,42 |

|     |        |                                                                                                                       |         |      |
|-----|--------|-----------------------------------------------------------------------------------------------------------------------|---------|------|
| 671 | O75874 | IDHC_HUMAN Isocitrate dehydrogenase [NADP] cytoplasmic OS=Homo sapiens OX=9606 GN=IDHC PE=1 SV=1                      | 254,82  | 1,42 |
| 672 | P52272 | HNRPM_HUMAN Heterogeneous nuclear ribonucleoprotein M OS=Homo sapiens OX=9606 GN=HNRPM PE=1 SV=1                      | 1136,39 | 1,42 |
| 673 | P61586 | RHOA_HUMAN Transforming protein RhoA OS=Homo sapiens OX=9606 GN=RHOA PE=1 SV=1                                        | 2430,91 | 1,42 |
| 674 | P10314 | 1A32_HUMAN HLA class I histocompatibility antigen_ A-32 alpha chain OS=Homo sapiens OX=9606 GN=1A32 PE=1 SV=1         | 763,93  | 1,42 |
| 675 | O14818 | PSA7_HUMAN Proteasome subunit alpha type-7 OS=Homo sapiens OX=9606 GN=PSM7 PE=1 SV=1                                  | 727,8   | 1,42 |
| 676 | P18085 | ARF4_HUMAN ADP-ribosylation factor 4 OS=Homo sapiens OX=9606 GN=ARF4 PE=1 SV=1                                        | 2053,12 | 1,42 |
| 677 | Q02878 | RL6_HUMAN 60S ribosomal protein L6 OS=Homo sapiens OX=9606 GN=RPL6 PE=1 SV=1                                          | 672,22  | 1,42 |
| 678 | P42677 | RS27_HUMAN 40S ribosomal protein S27 OS=Homo sapiens OX=9606 GN=RPS27 PE=1 SV=1                                       | 3518,56 | 1,42 |
| 679 | P09972 | ALDOC_HUMAN Fructose-bisphosphate aldolase C OS=Homo sapiens OX=9606 GN=ALDOC PE=1 SV=1                               | 751,33  | 1,42 |
| 680 | Q13642 | FHL1_HUMAN Four and a half LIM domains protein 1 OS=Homo sapiens OX=9606 GN=FHL1 PE=1 SV=1                            | 512,14  | 1,42 |
| 681 | P12004 | PCNA_HUMAN Proliferating cell nuclear antigen OS=Homo sapiens OX=9606 GN=PCNA PE=1 SV=1                               | 353,52  | 1,42 |
| 682 | P08195 | 4F2_HUMAN 4F2 cell-surface antigen heavy chain OS=Homo sapiens OX=9606 GN=SLC4F2 PE=1 SV=1                            | 291,19  | 1,42 |
| 683 | P09525 | ANXA4_HUMAN Annexin A4 OS=Homo sapiens OX=9606 GN=ANXA4 PE=1 SV=4                                                     | 7180,95 | 1,42 |
| 684 | P46782 | RS5_HUMAN 40S ribosomal protein S5 OS=Homo sapiens OX=9606 GN=RPS5 PE=1 SV=1                                          | 352,43  | 1,42 |
| 685 | Q14195 | DPYL3_HUMAN Dihydropyrimidinase-related protein 3 OS=Homo sapiens OX=9606 GN=DPYL3 PE=1 SV=1                          | 233,23  | 1,42 |
| 686 | P55854 | SUMO3_HUMAN Small ubiquitin-related modifier 3 OS=Homo sapiens OX=9606 GN=SUMO3 PE=1 SV=1                             | 2438,91 | 1,42 |
| 687 | P13010 | XRCC5_HUMAN X-ray repair cross-complementing protein 5 OS=Homo sapiens OX=9606 GN=XRCC5 PE=1 SV=1                     | 487,87  | 1,40 |
| 688 | Q58FG1 | HS904_HUMAN Putative heat shock protein HSP 90-alpha A4 OS=Homo sapiens OX=9606 GN=HS904 PE=1 SV=1                    | 1055,22 | 1,40 |
| 689 | P57721 | PCBP3_HUMAN Poly(rC)-binding protein 3 OS=Homo sapiens OX=9606 GN=PCBP3 PE=1 SV=1                                     | 1098,04 | 1,40 |
| 690 | Q9Y281 | COF2_HUMAN Cofilin-2 OS=Homo sapiens OX=9606 GN=CFL2 PE=1 SV=1                                                        | 3185,17 | 1,40 |
| 691 | P35268 | RL22_HUMAN 60S ribosomal protein L22 OS=Homo sapiens OX=9606 GN=RPL22 PE=1 SV=1                                       | 3484,59 | 1,40 |
| 692 | P07196 | NFL_HUMAN Neurofilament light polypeptide OS=Homo sapiens OX=9606 GN=NEFL PE=1 SV=1                                   | 418,02  | 1,40 |
| 693 | P23246 | SFPQ_HUMAN Splicing factor_ proline- and glutamine-rich OS=Homo sapiens OX=9606 GN=SFPQ PE=1 SV=1                     | 1041,6  | 1,40 |
| 694 | P62424 | RL7A_HUMAN 60S ribosomal protein L7a OS=Homo sapiens OX=9606 GN=RPL7A PE=1 SV=1                                       | 1403,41 | 1,40 |
| 695 | Q8NFI4 | F10A5_HUMAN Putative protein FAM10A5 OS=Homo sapiens OX=9606 GN=ST13P5 PE=1 SV=1                                      | 1168,09 | 1,40 |
| 696 | P62879 | GBB2_HUMAN Guanine nucleotide-binding protein G(I)/G(S)/G(T) subunit beta-2 OS=Homo sapiens OX=9606 GN=GBB2 PE=1 SV=1 | 575,85  | 1,40 |
| 697 | O43143 | DHX15_HUMAN Pre-mRNA-splicing factor ATP-dependent RNA helicase DHX15 OS=Homo sapiens OX=9606 GN=DHX15 PE=1 SV=1      | 281,38  | 1,40 |
| 698 | P49207 | RL34_HUMAN 60S ribosomal protein L34 OS=Homo sapiens OX=9606 GN=RPL34 PE=1 SV=1                                       | 364,02  | 1,40 |
| 699 | P35237 | SPB6_HUMAN Serpin B6 OS=Homo sapiens OX=9606 GN=SERPINB6 PE=1 SV=3                                                    | 172,97  | 1,40 |
| 700 | P19087 | GNAT2_HUMAN Guanine nucleotide-binding protein G(t) subunit alpha-2 OS=Homo sapiens OX=9606 GN=GNAT2 PE=1 SV=1        | 337,68  | 1,40 |
| 701 | P62140 | PP1B_HUMAN Serine/threonine-protein phosphatase PP1-beta catalytic subunit OS=Homo sapiens OX=9606 GN=PPP1B PE=1 SV=1 | 217,77  | 1,40 |

|     |        |                                                                                                                              |         |      |
|-----|--------|------------------------------------------------------------------------------------------------------------------------------|---------|------|
| 702 | P24534 | EF1B_HUMAN Elongation factor 1-beta OS=Homo sapiens OX=9606 GN=EEF1B2 PE=1                                                   | 667,75  | 1,39 |
| 703 | P50395 | GDIB_HUMAN Rab GDP dissociation inhibitor beta OS=Homo sapiens OX=9606 GN=GDIB2 PE=1 SV=2                                    | 1259,66 | 1,39 |
| 704 | P15153 | RAC2_HUMAN Ras-related C3 botulinum toxin substrate 2 OS=Homo sapiens OX=9606 GN=RAC2 PE=1 SV=2                              | 867,81  | 1,39 |
| 705 | P62913 | RL11_HUMAN 60S ribosomal protein L11 OS=Homo sapiens OX=9606 GN=RPL11 PE=1 SV=2                                              | 2373,91 | 1,39 |
| 706 | P30447 | 1A23_HUMAN HLA class I histocompatibility antigen_ A-23 alpha chain OS=Homo sapiens OX=9606 GN=HLA-A*02:01 PE=1 SV=2         | 650,66  | 1,39 |
| 707 | Q01469 | FABP5_HUMAN Fatty acid-binding protein_ epidermal OS=Homo sapiens OX=9606 GN=FABP5 PE=1 SV=2                                 | 1416,3  | 1,39 |
| 708 | P09382 | LEG1_HUMAN Galectin-1 OS=Homo sapiens OX=9606 GN=LGALS1 PE=1 SV=2                                                            | 3367,94 | 1,39 |
| 709 | P62873 | GBB1_HUMAN Guanine nucleotide-binding protein G(I)/G(S)/G(T) subunit beta-1 OS=Homo sapiens OX=9606 GN=GBB1 PE=1 SV=2        | 755,67  | 1,39 |
| 710 | P23528 | COF1_HUMAN Cofilin-1 OS=Homo sapiens OX=9606 GN=CFL1 PE=1 SV=3                                                               | 5953,2  | 1,39 |
| 711 | O60701 | UGDH_HUMAN UDP-glucose 6-dehydrogenase OS=Homo sapiens OX=9606 GN=UGDH PE=1 SV=2                                             | 680,95  | 1,39 |
| 712 | P05534 | 1A24_HUMAN HLA class I histocompatibility antigen_ A-24 alpha chain OS=Homo sapiens OX=9606 GN=HLA-A*02:01 PE=1 SV=2         | 650,66  | 1,39 |
| 713 | Q15185 | TEBP_HUMAN Prostaglandin E synthase 3 OS=Homo sapiens OX=9606 GN=PTGES3 PE=1 SV=2                                            | 910,52  | 1,39 |
| 714 | P61158 | ARP3_HUMAN Actin-related protein 3 OS=Homo sapiens OX=9606 GN=ACTR3 PE=1 SV=2                                                | 305,44  | 1,39 |
| 715 | E9PAV3 | NACAM_HUMAN Nascent polypeptide-associated complex subunit alpha_ muscle-specific OS=Homo sapiens OX=9606 GN=NACAM PE=1 SV=2 | 438,09  | 1,39 |
| 716 | P78417 | GSTO1_HUMAN Glutathione S-transferase omega-1 OS=Homo sapiens OX=9606 GN=GSTO1 PE=1 SV=2                                     | 504,84  | 1,39 |
| 717 | Q4VXU2 | PAP1L_HUMAN Polyadenylate-binding protein 1-like OS=Homo sapiens OX=9606 GN=PAP1L PE=1 SV=2                                  | 154,68  | 1,39 |
| 718 | O75531 | BAF_HUMAN Barrier-to-autointegration factor OS=Homo sapiens OX=9606 GN=BANF1 PE=1 SV=2                                       | 406,73  | 1,39 |
| 719 | P40227 | TCPZ_HUMAN T-complex protein 1 subunit zeta OS=Homo sapiens OX=9606 GN=CCT6 PE=1 SV=2                                        | 335,69  | 1,39 |
| 720 | O43852 | CALU_HUMAN Calumenin OS=Homo sapiens OX=9606 GN=CALU PE=1 SV=2                                                               | 322,38  | 1,39 |
| 721 | Q9UBI6 | GBG12_HUMAN Guanine nucleotide-binding protein G(I)/G(S)/G(O) subunit gamma-1 OS=Homo sapiens OX=9606 GN=GBG12 PE=1 SV=2     | 1012,87 | 1,39 |
| 722 | P22626 | ROA2_HUMAN Heterogeneous nuclear ribonucleoproteins A2/B1 OS=Homo sapiens OX=9606 GN=ROA2 PE=1 SV=2                          | 741,07  | 1,38 |
| 723 | P84085 | ARF5_HUMAN ADP-ribosylation factor 5 OS=Homo sapiens OX=9606 GN=ARF5 PE=1 SV=2                                               | 1508,17 | 1,38 |
| 724 | P48047 | ATPO_HUMAN ATP synthase subunit O_ mitochondrial OS=Homo sapiens OX=9606 GN=ATPO PE=1 SV=2                                   | 1059,29 | 1,38 |
| 725 | P17987 | TCPA_HUMAN T-complex protein 1 subunit alpha OS=Homo sapiens OX=9606 GN=TCPA PE=1 SV=2                                       | 420,47  | 1,38 |
| 726 | P61160 | ARP2_HUMAN Actin-related protein 2 OS=Homo sapiens OX=9606 GN=ACTR2 PE=1 SV=2                                                | 738,1   | 1,38 |
| 727 | P55795 | HNRH2_HUMAN Heterogeneous nuclear ribonucleoprotein H2 OS=Homo sapiens OX=9606 GN=HNRH2 PE=1 SV=2                            | 424,35  | 1,38 |
| 728 | P26599 | PTBP1_HUMAN Polypyrimidine tract-binding protein 1 OS=Homo sapiens OX=9606 GN=PTBP1 PE=1 SV=2                                | 361,93  | 1,38 |
| 729 | Q16658 | FSCN1_HUMAN Fascin OS=Homo sapiens OX=9606 GN=FSCN1 PE=1 SV=3                                                                | 640,54  | 1,38 |
| 730 | P60981 | DEST_HUMAN Dextrin OS=Homo sapiens OX=9606 GN=DSTN PE=1 SV=3                                                                 | 1794,09 | 1,38 |
| 731 | P67936 | TPM4_HUMAN Tropomyosin alpha-4 chain OS=Homo sapiens OX=9606 GN=TPM4 PE=1 SV=2                                               | 849,23  | 1,38 |
| 732 | Q6NVV1 | R13P3_HUMAN Putative 60S ribosomal protein L13a protein RPL13AP3 OS=Homo sapiens OX=9606 GN=RPL13AP3 PE=1 SV=2               | 2008,29 | 1,38 |



|     |        |                                                                                       |         |      |
|-----|--------|---------------------------------------------------------------------------------------|---------|------|
| 733 | P08134 | RHOC_HUMAN Rho-related GTP-binding protein RhoC OS=Homo sapiens OX=9606 GN            | 2350,19 | 1,38 |
| 734 | P09211 | GSTP1_HUMAN Glutathione S-transferase P OS=Homo sapiens OX=9606 GN=GSTP1 PI           | 3664,45 | 1,38 |
| 735 | Q13263 | TIF1B_HUMAN Transcription intermediary factor 1-beta OS=Homo sapiens OX=9606 C        | 531,73  | 1,38 |
| 736 | P61978 | HNRPK_HUMAN Heterogeneous nuclear ribonucleoprotein K OS=Homo sapiens OX=9606 GN      | 1841,92 | 1,38 |
| 737 | Q70Z35 | PREX2_HUMAN Phosphatidylinositol 3_4_5-trisphosphate-dependent Rac exchanger 2        | 335,35  | 1,38 |
| 738 | P04080 | CYTB_HUMAN Cystatin-B OS=Homo sapiens OX=9606 GN=CSTB PE=1 SV=2                       | 2967,8  | 1,38 |
| 739 | P63000 | RAC1_HUMAN Ras-related C3 botulinum toxin substrate 1 OS=Homo sapiens OX=9606 GN      | 1152,16 | 1,38 |
| 740 | P52943 | CRIP2_HUMAN Cysteine-rich protein 2 OS=Homo sapiens OX=9606 GN=CRIP2 PE=1 SV          | 669,43  | 1,38 |
| 741 | Q9UBT6 | POLK_HUMAN DNA polymerase kappa OS=Homo sapiens OX=9606 GN=POLK PE=1 SV               | 325,47  | 1,38 |
| 742 | P22314 | UBA1_HUMAN Ubiquitin-like modifier-activating enzyme 1 OS=Homo sapiens OX=9606 GN     | 500,91  | 1,36 |
| 743 | P40939 | ECHA_HUMAN Trifunctional enzyme subunit alpha_ mitochondrial OS=Homo sapiens          | 591,83  | 1,36 |
| 744 | Q16181 | SEPT7_HUMAN Septin-7 OS=Homo sapiens OX=9606 GN=SEPT7 PE=1 SV=2                       | 492,76  | 1,36 |
| 745 | O94925 | GLSK_HUMAN Glutaminase kidney isoform_ mitochondrial OS=Homo sapiens OX=9606 GN       | 767,34  | 1,36 |
| 746 | P31948 | STIP1_HUMAN Stress-induced-phosphoprotein 1 OS=Homo sapiens OX=9606 GN=STIP1 PE=1 SV  | 925,06  | 1,36 |
| 747 | P62937 | PPIA_HUMAN Peptidyl-prolyl cis-trans isomerase A OS=Homo sapiens OX=9606 GN=PI        | 2735,37 | 1,36 |
| 748 | Q99497 | PARK7_HUMAN Protein/nucleic acid deglycase DJ-1 OS=Homo sapiens OX=9606 GN=P          | 3577,66 | 1,36 |
| 749 | P05023 | AT1A1_HUMAN Sodium/potassium-transporting ATPase subunit alpha-1 OS=Homo sa           | 912,92  | 1,36 |
| 750 | P14625 | ENPL_HUMAN Endoplasmic reticulum protein OS=Homo sapiens OX=9606 GN=HSP90B1 PE=1 SV=1 | 4478,02 | 1,36 |
| 751 | P46776 | RL27A_HUMAN 60S ribosomal protein L27a OS=Homo sapiens OX=9606 GN=RPL27A F            | 1708,91 | 1,36 |
| 752 | Q15233 | NONO_HUMAN Non-POU domain-containing octamer-binding protein OS=Homo sapiens          | 676,14  | 1,36 |
| 753 | P50502 | F10A1_HUMAN Hsc70-interacting protein OS=Homo sapiens OX=9606 GN=ST13 PE=1 SV=1       | 1836,11 | 1,36 |
| 754 | P13797 | PLST_HUMAN Plastin-3 OS=Homo sapiens OX=9606 GN=PLS3 PE=1 SV=4                        | 374,53  | 1,36 |
| 755 | P36578 | RL4_HUMAN 60S ribosomal protein L4 OS=Homo sapiens OX=9606 GN=RPL4 PE=1 SV=1          | 950,7   | 1,36 |
| 756 | P61313 | RL15_HUMAN 60S ribosomal protein L15 OS=Homo sapiens OX=9606 GN=RPL15 PE=1 SV=1       | 1305,63 | 1,36 |
| 757 | Q9Y3U8 | RL36_HUMAN 60S ribosomal protein L36 OS=Homo sapiens OX=9606 GN=RPL36 PE=1 SV=1       | 1679,66 | 1,36 |
| 758 | O60343 | TBCD4_HUMAN TBC1 domain family member 4 OS=Homo sapiens OX=9606 GN=TBC1               | 316,99  | 1,36 |
| 759 | P49755 | TMEDA_HUMAN Transmembrane emp24 domain-containing protein 10 OS=Homo sapiens          | 478,44  | 1,36 |
| 760 | Q9Y266 | NUDC_HUMAN Nuclear migration protein nudC OS=Homo sapiens OX=9606 GN=NUDC1            | 468,72  | 1,36 |
| 761 | P18669 | PGAM1_HUMAN Phosphoglycerate mutase 1 OS=Homo sapiens OX=9606 GN=PGAM1                | 702     | 1,36 |
| 762 | P61020 | RAB5B_HUMAN Ras-related protein Rab-5B OS=Homo sapiens OX=9606 GN=RAB5B PI            | 1049,04 | 1,36 |
| 763 | P62857 | RS28_HUMAN 40S ribosomal protein S28 OS=Homo sapiens OX=9606 GN=RPS28 PE=1 SV=1       | 1107,03 | 1,36 |

|     |        |                                                                                    |         |      |
|-----|--------|------------------------------------------------------------------------------------|---------|------|
| 764 | P51149 | RAB7A_HUMAN Ras-related protein Rab-7a OS=Homo sapiens OX=9606 GN=RAB7A PI         | 2149,97 | 1,35 |
| 765 | P62917 | RL8_HUMAN 60S ribosomal protein L8 OS=Homo sapiens OX=9606 GN=RPL8 PE=1 SV=        | 2507,74 | 1,35 |
| 766 | P35609 | ACTN2_HUMAN Alpha-actinin-2 OS=Homo sapiens OX=9606 GN=ACTN2 PE=1 SV=1             | 748,94  | 1,35 |
| 767 | P05387 | RLA2_HUMAN 60S acidic ribosomal protein P2 OS=Homo sapiens OX=9606 GN=RPLP2        | 4400,03 | 1,35 |
| 768 | Q93045 | STMN2_HUMAN Stathmin-2 OS=Homo sapiens OX=9606 GN=STMN2 PE=1 SV=3                  | 991,6   | 1,35 |
| 769 | Q00839 | HNRPU_HUMAN Heterogeneous nuclear ribonucleoprotein U OS=Homo sapiens OX=9         | 1268,92 | 1,35 |
| 770 | P04075 | ALDOA_HUMAN Fructose-bisphosphate aldolase A OS=Homo sapiens OX=9606 GN=Al         | 4683,95 | 1,35 |
| 771 | P55084 | ECHB_HUMAN Trifunctional enzyme subunit beta_ mitochondrial OS=Homo sapiens C      | 325,29  | 1,35 |
| 772 | Q12797 | ASPH_HUMAN Aspartyl/asparaginyl beta-hydroxylase OS=Homo sapiens OX=9606 GN:       | 167,83  | 1,35 |
| 773 | P27816 | MAP4_HUMAN Microtubule-associated protein 4 OS=Homo sapiens OX=9606 GN=MA          | 224,31  | 1,35 |
| 774 | P06576 | ATPB_HUMAN ATP synthase subunit beta_ mitochondrial OS=Homo sapiens OX=9606        | 4118,66 | 1,34 |
| 775 | O95758 | PTBP3_HUMAN Polypyrimidine tract-binding protein 3 OS=Homo sapiens OX=9606 GN      | 186,76  | 1,34 |
| 776 | P52209 | 6PGD_HUMAN 6-phosphogluconate dehydrogenase_ decarboxylating OS=Homo sapie         | 619,36  | 1,34 |
| 777 | P53999 | TCP4_HUMAN Activated RNA polymerase II transcriptional coactivator p15 OS=Homo     | 1918,53 | 1,34 |
| 778 | P23396 | RS3_HUMAN 40S ribosomal protein S3 OS=Homo sapiens OX=9606 GN=RPS3 PE=1 SV:        | 2628,66 | 1,34 |
| 779 | P37802 | TAGL2_HUMAN Transgelin-2 OS=Homo sapiens OX=9606 GN=TAGLN2 PE=1 SV=3               | 6142,84 | 1,34 |
| 780 | P17661 | DESM_HUMAN Desmin OS=Homo sapiens OX=9606 GN=DES PE=1 SV=3                         | 1180,49 | 1,34 |
| 781 | O60506 | HNRPQ_HUMAN Heterogeneous nuclear ribonucleoprotein Q OS=Homo sapiens OX=9         | 433,75  | 1,34 |
| 782 | P62280 | RS11_HUMAN 40S ribosomal protein S11 OS=Homo sapiens OX=9606 GN=RPS11 PE=1         | 1807,43 | 1,34 |
| 783 | P39687 | AN32A_HUMAN Acidic leucine-rich nuclear phosphoprotein 32 family member A OS=H     | 494,77  | 1,34 |
| 784 | Q07020 | RL18_HUMAN 60S ribosomal protein L18 OS=Homo sapiens OX=9606 GN=RPL18 PE=1         | 1781,41 | 1,34 |
| 785 | P32119 | PRDX2_HUMAN Peroxiredoxin-2 OS=Homo sapiens OX=9606 GN=PRDX2 PE=1 SV=5             | 1366,99 | 1,34 |
| 786 | P08758 | ANXA5_HUMAN Annexin A5 OS=Homo sapiens OX=9606 GN=ANXA5 PE=1 SV=2                  | 3275,42 | 1,34 |
| 787 | P50995 | ANX11_HUMAN Annexin A11 OS=Homo sapiens OX=9606 GN=ANXA11 PE=1 SV=1                | 225,86  | 1,34 |
| 788 | P55786 | PSA_HUMAN Puromycin-sensitive aminopeptidase OS=Homo sapiens OX=9606 GN=NI         | 402,73  | 1,34 |
| 789 | P63244 | RACK1_HUMAN Receptor of activated protein C kinase 1 OS=Homo sapiens OX=9606 (     | 2559,24 | 1,34 |
| 790 | P09960 | LKHA4_HUMAN Leukotriene A-4 hydrolase OS=Homo sapiens OX=9606 GN=LTA4H PE:         | 221,89  | 1,34 |
| 791 | P32970 | CD70_HUMAN CD70 antigen OS=Homo sapiens OX=9606 GN=CD70 PE=1 SV=2                  | 555,55  | 1,34 |
| 792 | P13073 | COX41_HUMAN Cytochrome c oxidase subunit 4 isoform 1_ mitochondrial OS=Homo :      | 399,41  | 1,34 |
| 793 | P60174 | TPIS_HUMAN Triosephosphate isomerase OS=Homo sapiens OX=9606 GN=TPI1 PE=1 :        | 7682,34 | 1,32 |
| 794 | P41091 | IF2G_HUMAN Eukaryotic translation initiation factor 2 subunit 3 OS=Homo sapiens OX | 372,4   | 1,32 |

|     |        |                                                                                 |         |      |
|-----|--------|---------------------------------------------------------------------------------|---------|------|
| 795 | Q14847 | LASP1_HUMAN LIM and SH3 domain protein 1 OS=Homo sapiens OX=9606 GN=LASP1       | 994,22  | 1,32 |
| 796 | Q29960 | 1C16_HUMAN HLA class I histocompatibility antigen_ Cw-16 alpha chain OS=Homo sa | 611,33  | 1,32 |
| 797 | Q92598 | HS105_HUMAN Heat shock protein 105 kDa OS=Homo sapiens OX=9606 GN=HSPH1 P       | 280,58  | 1,32 |
| 798 | P45880 | VDAC2_HUMAN Voltage-dependent anion-selective channel protein 2 OS=Homo sapie   | 934,94  | 1,32 |
| 799 | Q16555 | DPYL2_HUMAN Dihydropyrimidinase-related protein 2 OS=Homo sapiens OX=9606 GN    | 445,87  | 1,32 |
| 800 | P60842 | IF4A1_HUMAN Eukaryotic initiation factor 4A-I OS=Homo sapiens OX=9606 GN=EIF4A  | 2426,99 | 1,32 |
| 801 | Q92841 | DDX17_HUMAN Probable ATP-dependent RNA helicase DDX17 OS=Homo sapiens OX=       | 1091,83 | 1,32 |
| 802 | P16949 | STMN1_HUMAN Stathmin OS=Homo sapiens OX=9606 GN=STMN1 PE=1 SV=3                 | 2136,5  | 1,32 |
| 803 | Q71UM5 | RS27L_HUMAN 40S ribosomal protein S27-like OS=Homo sapiens OX=9606 GN=RPS27     | 3416,42 | 1,32 |
| 804 | Q8TAA3 | PSMA8_HUMAN Proteasome subunit alpha-type 8 OS=Homo sapiens OX=9606 GN=PS       | 233,3   | 1,32 |
| 805 | Q15019 | SEPT2_HUMAN Septin-2 OS=Homo sapiens OX=9606 GN=SEPT2 PE=1 SV=1                 | 572,95  | 1,32 |
| 806 | P47756 | CAPZB_HUMAN F-actin-capping protein subunit beta OS=Homo sapiens OX=9606 GN=    | 361,1   | 1,32 |
| 807 | P32019 | I5P2_HUMAN Type II inositol 1_4_5-trisphosphate 5-phosphatase OS=Homo sapiens C | 278,85  | 1,32 |
| 808 | Q07065 | CKAP4_HUMAN Cytoskeleton-associated protein 4 OS=Homo sapiens OX=9606 GN=Ck     | 397,39  | 1,32 |
| 809 | P67809 | YBOX1_HUMAN Nuclease-sensitive element-binding protein 1 OS=Homo sapiens OX=!   | 1007,93 | 1,32 |
| 810 | Q03252 | LMNB2_HUMAN Lamin-B2 OS=Homo sapiens OX=9606 GN=LMNB2 PE=1 SV=4                 | 282,15  | 1,32 |
| 811 | P37837 | TALDO_HUMAN Transaldolase OS=Homo sapiens OX=9606 GN=TALDO1 PE=1 SV=2           | 2340,42 | 1,31 |
| 812 | P34897 | GLYM_HUMAN Serine hydroxymethyltransferase_ mitochondrial OS=Homo sapiens O     | 534,01  | 1,31 |
| 813 | P06748 | NPM_HUMAN Nucleophosmin OS=Homo sapiens OX=9606 GN=NPM1 PE=1 SV=2               | 3924,62 | 1,31 |
| 814 | P62826 | RAN_HUMAN GTP-binding nuclear protein Ran OS=Homo sapiens OX=9606 GN=RAN F      | 4538,19 | 1,31 |
| 815 | Q9UQ80 | PA2G4_HUMAN Proliferation-associated protein 2G4 OS=Homo sapiens OX=9606 GN=    | 1542,81 | 1,31 |
| 816 | P18621 | RL17_HUMAN 60S ribosomal protein L17 OS=Homo sapiens OX=9606 GN=RPL17 PE=1      | 1836,62 | 1,31 |
| 817 | P30041 | PRDX6_HUMAN Peroxiredoxin-6 OS=Homo sapiens OX=9606 GN=PRDX6 PE=1 SV=3          | 1669,2  | 1,31 |
| 818 | P55072 | TERA_HUMAN Transitional endoplasmic reticulum ATPase OS=Homo sapiens OX=960!    | 4673,64 | 1,31 |
| 819 | Q8IZP2 | ST134_HUMAN Putative protein FAM10A4 OS=Homo sapiens OX=9606 GN=ST13P4 PE       | 1818,59 | 1,31 |
| 820 | P25705 | ATPA_HUMAN ATP synthase subunit alpha_ mitochondrial OS=Homo sapiens OX=960     | 3226,52 | 1,31 |
| 821 | Q99623 | PHB2_HUMAN Prohibitin-2 OS=Homo sapiens OX=9606 GN=PHB2 PE=1 SV=2               | 534,52  | 1,31 |
| 822 | P36542 | ATPG_HUMAN ATP synthase subunit gamma_ mitochondrial OS=Homo sapiens OX=9!      | 610,43  | 1,31 |
| 823 | P68036 | UB2L3_HUMAN Ubiquitin-conjugating enzyme E2 L3 OS=Homo sapiens OX=9606 GN=!     | 854,58  | 1,31 |
| 824 | P46940 | IQGA1_HUMAN Ras GTPase-activating-like protein IQGAP1 OS=Homo sapiens OX=960    | 379,55  | 1,31 |
| 825 | P08133 | ANXA6_HUMAN Annexin A6 OS=Homo sapiens OX=9606 GN=ANXA6 PE=1 SV=3               | 323,09  | 1,31 |

|     |        |                                                                                        |          |      |
|-----|--------|----------------------------------------------------------------------------------------|----------|------|
| 826 | Q14697 | GANAB_HUMAN Neutral alpha-glucosidase AB OS=Homo sapiens OX=9606 GN=GANA               | 687,91   | 1,31 |
| 827 | P07951 | TPM2_HUMAN Tropomyosin beta chain OS=Homo sapiens OX=9606 GN=TPM2 PE=1 SV=2            | 848,84   | 1,31 |
| 828 | O75828 | CBR3_HUMAN Carbonyl reductase [NADPH] 3 OS=Homo sapiens OX=9606 GN=CBR3 P              | 465,07   | 1,31 |
| 829 | P62910 | RL32_HUMAN 60S ribosomal protein L32 OS=Homo sapiens OX=9606 GN=RPL32 PE=1             | 780,88   | 1,31 |
| 830 | P47914 | RL29_HUMAN 60S ribosomal protein L29 OS=Homo sapiens OX=9606 GN=RPL29 PE=1             | 455,33   | 1,31 |
| 831 | P00742 | FA10_HUMAN Coagulation factor X OS=Homo sapiens OX=9606 GN=F10 PE=1 SV=2               | 247,8    | 1,31 |
| 832 | P15880 | RS2_HUMAN 40S ribosomal protein S2 OS=Homo sapiens OX=9606 GN=RPS2 PE=1 SV=1           | 1562,31  | 1,30 |
| 833 | P07900 | HS90A_HUMAN Heat shock protein HSP 90-alpha OS=Homo sapiens OX=9606 GN=HSF1            | 11750,56 | 1,30 |
| 834 | Q14240 | IF4A2_HUMAN Eukaryotic initiation factor 4A-II OS=Homo sapiens OX=9606 GN=EIF4A        | 1844,78  | 1,30 |
| 835 | P07237 | PDIA1_HUMAN Protein disulfide-isomerase OS=Homo sapiens OX=9606 GN=P4HB PE=1           | 2226,74  | 1,30 |
| 836 | P0DMV9 | HS71B_HUMAN Heat shock 70 kDa protein 1B OS=Homo sapiens OX=9606 GN=HSPA1              | 5269,26  | 1,30 |
| 837 | P0DMV8 | HS71A_HUMAN Heat shock 70 kDa protein 1A OS=Homo sapiens OX=9606 GN=HSPA1              | 5269,26  | 1,30 |
| 838 | P06753 | TPM3_HUMAN Tropomyosin alpha-3 chain OS=Homo sapiens OX=9606 GN=TPM3 PE=1              | 796,56   | 1,30 |
| 839 | Q00325 | MPCP_HUMAN Phosphate carrier protein_ mitochondrial OS=Homo sapiens OX=9606 GN=MPCP    | 1481,94  | 1,30 |
| 840 | P31150 | GDIA_HUMAN Rab GDP dissociation inhibitor alpha OS=Homo sapiens OX=9606 GN=GDI         | 534,86   | 1,30 |
| 841 | P15311 | EZRI_HUMAN Ezrin OS=Homo sapiens OX=9606 GN=EZR PE=1 SV=4                              | 2481,99  | 1,30 |
| 842 | P40429 | RL13A_HUMAN 60S ribosomal protein L13a OS=Homo sapiens OX=9606 GN=RPL13A F             | 3199,99  | 1,30 |
| 843 | Q08043 | ACTN3_HUMAN Alpha-actinin-3 OS=Homo sapiens OX=9606 GN=ACTN3 PE=1 SV=2                 | 634,47   | 1,30 |
| 844 | P61353 | RL27_HUMAN 60S ribosomal protein L27 OS=Homo sapiens OX=9606 GN=RPL27 PE=1             | 784,85   | 1,30 |
| 845 | P18206 | VINC_HUMAN Vinculin OS=Homo sapiens OX=9606 GN=VCL PE=1 SV=4                           | 1041,2   | 1,30 |
| 846 | P62899 | RL31_HUMAN 60S ribosomal protein L31 OS=Homo sapiens OX=9606 GN=RPL31 PE=1             | 993,28   | 1,30 |
| 847 | Q5T655 | CFA58_HUMAN Cilia- and flagella-associated protein 58 OS=Homo sapiens OX=9606 GN=CFA58 | 317,58   | 1,30 |
| 848 | Q96DA2 | RB39B_HUMAN Ras-related protein Rab-39B OS=Homo sapiens OX=9606 GN=RAB39B              | 1095,81  | 1,30 |
| 849 | P62263 | RS14_HUMAN 40S ribosomal protein S14 OS=Homo sapiens OX=9606 GN=RPS14 PE=1             | 1415,93  | 1,30 |
| 850 | P30455 | 1A36_HUMAN HLA class I histocompatibility antigen_ A-36 alpha chain OS=Homo sapiens    | 544,17   | 1,30 |
| 851 | P22234 | PUR6_HUMAN Multifunctional protein ADE2 OS=Homo sapiens OX=9606 GN=PAICS1              | 283,26   | 1,30 |
| 852 | O14980 | XPO1_HUMAN Exportin-1 OS=Homo sapiens OX=9606 GN=XPO1 PE=1 SV=1                        | 281,51   | 1,30 |
| 853 | A5PKW4 | PSD1_HUMAN PH and SEC7 domain-containing protein 1 OS=Homo sapiens OX=9606 GN=PSD1     | 282,45   | 1,30 |
| 854 | P30443 | 1A01_HUMAN HLA class I histocompatibility antigen_ A-1 alpha chain OS=Homo sapiens     | 544,17   | 1,30 |
| 855 | P54577 | SYYC_HUMAN Tyrosine--tRNA ligase_ cytoplasmic OS=Homo sapiens OX=9606 GN=YAC1          | 454,8    | 0,70 |
| 856 | Q6ZU80 | CE128_HUMAN Centrosomal protein of 128 kDa OS=Homo sapiens OX=9606 GN=CEP1             | 71,53    | 0,70 |

|     |        |                                                                                                            |         |      |
|-----|--------|------------------------------------------------------------------------------------------------------------|---------|------|
| 857 | P02768 | ALBU_HUMAN Serum albumin OS=Homo sapiens OX=9606 GN=ALB PE=1 SV=2                                          | 3368,19 | 0,70 |
| 858 | P29992 | GNA11_HUMAN Guanine nucleotide-binding protein subunit alpha-11 OS=Homo sapiens OX=9606 GN=GNA11 PE=1 SV=2 | 533,12  | 0,69 |
| 859 | Q9Y2J8 | PADI2_HUMAN Protein-arginine deiminase type-2 OS=Homo sapiens OX=9606 GN=PA                                | 114,95  | 0,65 |
| 860 | P04004 | VTNC_HUMAN Vitronectin OS=Homo sapiens OX=9606 GN=VTN PE=1 SV=1                                            | 253,9   | 0,65 |
| 861 | Q04695 | K1C17_HUMAN Keratin_type I cytoskeletal 17 OS=Homo sapiens OX=9606 GN=KRT17                                | 947,15  | 0,65 |
| 862 | P19012 | K1C15_HUMAN Keratin_type I cytoskeletal 15 OS=Homo sapiens OX=9606 GN=KRT15                                | 881,79  | 0,65 |
| 863 | Q14532 | K1H2_HUMAN Keratin_type I cuticular Ha2 OS=Homo sapiens OX=9606 GN=KRT32 PE=1 SV=1                         | 490,45  | 0,64 |
| 864 | Q8N371 | KDM8_HUMAN JmjC domain-containing protein 5 OS=Homo sapiens OX=9606 GN=KD                                  | 308,21  | 0,64 |
| 865 | P69891 | HBG1_HUMAN Hemoglobin subunit gamma-1 OS=Homo sapiens OX=9606 GN=HBG1 I                                    | 1173,15 | 0,64 |
| 866 | O76014 | KRT37_HUMAN Keratin_type I cuticular Ha7 OS=Homo sapiens OX=9606 GN=KRT37 P                                | 456,85  | 0,64 |
| 867 | Q6N069 | NAA16_HUMAN N-alpha-acetyltransferase 16_NatA auxiliary subunit OS=Homo sapiens OX=9606 GN=NAA16 PE=1 SV=1 | 330,45  | 0,63 |
| 868 | P06732 | KCRM_HUMAN Creatine kinase M-type OS=Homo sapiens OX=9606 GN=CKM PE=1 SV=1                                 | 567,5   | 0,63 |
| 869 | O76015 | KRT38_HUMAN Keratin_type I cuticular Ha8 OS=Homo sapiens OX=9606 GN=KRT38 P                                | 456,85  | 0,63 |
| 870 | O76013 | KRT36_HUMAN Keratin_type I cuticular Ha6 OS=Homo sapiens OX=9606 GN=KRT36 P                                | 516,67  | 0,63 |
| 871 | Q99456 | K1C12_HUMAN Keratin_type I cytoskeletal 12 OS=Homo sapiens OX=9606 GN=KRT12                                | 353,6   | 0,63 |
| 872 | P69892 | HBG2_HUMAN Hemoglobin subunit gamma-2 OS=Homo sapiens OX=9606 GN=HBG2 I                                    | 1173,15 | 0,63 |
| 873 | P02100 | HBE_HUMAN Hemoglobin subunit epsilon OS=Homo sapiens OX=9606 GN=HBE1 PE=1 SV=1                             | 1173,15 | 0,62 |
| 874 | O95155 | UBE4B_HUMAN Ubiquitin conjugation factor E4 B OS=Homo sapiens OX=9606 GN=UB                                | 279,84  | 0,62 |
| 875 | P04259 | K2C6B_HUMAN Keratin_type II cytoskeletal 6B OS=Homo sapiens OX=9606 GN=KRT6B                               | 1306,79 | 0,62 |
| 876 | Q7Z794 | K2C1B_HUMAN Keratin_type II cytoskeletal 1b OS=Homo sapiens OX=9606 GN=KRT7B                               | 921,11  | 0,62 |
| 877 | Q2M2I5 | K1C24_HUMAN Keratin_type I cytoskeletal 24 OS=Homo sapiens OX=9606 GN=KRT24                                | 595,71  | 0,62 |
| 878 | Q92764 | KRT35_HUMAN Keratin_type I cuticular Ha5 OS=Homo sapiens OX=9606 GN=KRT35 P                                | 599,04  | 0,61 |
| 879 | P48668 | K2C6C_HUMAN Keratin_type II cytoskeletal 6C OS=Homo sapiens OX=9606 GN=KRT6C                               | 352,75  | 0,61 |
| 880 | P08779 | K1C16_HUMAN Keratin_type I cytoskeletal 16 OS=Homo sapiens OX=9606 GN=KRT16                                | 1331,92 | 0,61 |
| 881 | Q5JTH9 | RRP12_HUMAN RRP12-like protein OS=Homo sapiens OX=9606 GN=RRP12 PE=1 SV=2                                  | 428,82  | 0,60 |
| 882 | Q14525 | KT33B_HUMAN Keratin_type I cuticular Ha3-II OS=Homo sapiens OX=9606 GN=KRT33                               | 485,3   | 0,60 |
| 883 | P02042 | HBD_HUMAN Hemoglobin subunit delta OS=Homo sapiens OX=9606 GN=HBD PE=1 SV=1                                | 1445,61 | 0,59 |
| 884 | P02533 | K1C14_HUMAN Keratin_type I cytoskeletal 14 OS=Homo sapiens OX=9606 GN=KRT14                                | 1283,19 | 0,59 |
| 885 | P13646 | K1C13_HUMAN Keratin_type I cytoskeletal 13 OS=Homo sapiens OX=9606 GN=KRT13                                | 654,85  | 0,59 |
| 886 | P68871 | HBB_HUMAN Hemoglobin subunit beta OS=Homo sapiens OX=9606 GN=HBB PE=1 SV=1                                 | 1465,08 | 0,59 |
| 887 | P02538 | K2C6A_HUMAN Keratin_type II cytoskeletal 6A OS=Homo sapiens OX=9606 GN=KRT6A                               | 352,75  | 0,59 |

|     |        |                                                                                  |         |      |
|-----|--------|----------------------------------------------------------------------------------|---------|------|
| 888 | P19013 | K2C4_HUMAN Keratin_ type II cytoskeletal 4 OS=Homo sapiens OX=9606 GN=KRT4 PE    | 168,74  | 0,58 |
| 889 | P02787 | TRFE_HUMAN Serotransferrin OS=Homo sapiens OX=9606 GN=TF PE=1 SV=3               | 606,31  | 0,58 |
| 890 | Q15323 | K1H1_HUMAN Keratin_ type I cuticular Ha1 OS=Homo sapiens OX=9606 GN=KRT31 PE     | 498,34  | 0,58 |
| 891 | P04264 | K2C1_HUMAN Keratin_ type II cytoskeletal 1 OS=Homo sapiens OX=9606 GN=KRT1 PE    | 7093,49 | 0,57 |
| 892 | P38405 | GNAL_HUMAN Guanine nucleotide-binding protein G(olf) subunit alpha OS=Homo sap   | 522,64  | 0,57 |
| 893 | P35527 | K1C9_HUMAN Keratin_ type I cytoskeletal 9 OS=Homo sapiens OX=9606 GN=KRT9 PE=    | 2115,94 | 0,56 |
| 894 | Q01432 | AMPD3_HUMAN AMP deaminase 3 OS=Homo sapiens OX=9606 GN=AMPD3 PE=1 SV=            | 284,49  | 0,55 |
| 895 | P35908 | K22E_HUMAN Keratin_ type II cytoskeletal 2 epidermal OS=Homo sapiens OX=9606 G   | 2299,27 | 0,55 |
| 896 | Q9BS26 | ERP44_HUMAN Endoplasmic reticulum resident protein 44 OS=Homo sapiens OX=960     | 308,44  | 0,54 |
| 897 | P13645 | K1C10_HUMAN Keratin_ type I cytoskeletal 10 OS=Homo sapiens OX=9606 GN=KRT10     | 3977,56 | 0,54 |
| 898 | P02749 | APOH_HUMAN Beta-2-glycoprotein 1 OS=Homo sapiens OX=9606 GN=APOH PE=1 SV=        | 367,34  | 0,54 |
| 899 | P69905 | HBA_HUMAN Hemoglobin subunit alpha OS=Homo sapiens OX=9606 GN=HBA1 PE=1 !        | 626,48  | 0,54 |
| 900 | Q7Z3Y7 | K1C28_HUMAN Keratin_ type I cytoskeletal 28 OS=Homo sapiens OX=9606 GN=KRT28     | 1232,55 | 0,54 |
| 901 | P52292 | IMA1_HUMAN Importin subunit alpha-1 OS=Homo sapiens OX=9606 GN=KPNA2 PE=1        | 285,95  | 0,54 |
| 902 | P81605 | DCD_HUMAN Dermcidin OS=Homo sapiens OX=9606 GN=DCD PE=1 SV=2                     | 904,64  | 0,54 |
| 903 | Q8NDV3 | SMC1B_HUMAN Structural maintenance of chromosomes protein 1B OS=Homo sapier      | 97,04   | 0,54 |
| 904 | O60218 | AK1BA_HUMAN Aldo-keto reductase family 1 member B10 OS=Homo sapiens OX=960       | 444,62  | 0,52 |
| 905 | Q9GZV4 | IF5A2_HUMAN Eukaryotic translation initiation factor 5A-2 OS=Homo sapiens OX=960 | 346,65  | 0,52 |
| 906 | Q9BX84 | TRPM6_HUMAN Transient receptor potential cation channel subfamily M member 6 C   | 423,61  | 0,52 |
| 907 | Q9BTC0 | DIDO1_HUMAN Death-inducer obliterator 1 OS=Homo sapiens OX=9606 GN=DIDO1 P       | 306,85  | 0,52 |
| 908 | Q7Z3Y9 | K1C26_HUMAN Keratin_ type I cytoskeletal 26 OS=Homo sapiens OX=9606 GN=KRT26     | 336,58  | 0,52 |
| 909 | Q6UVJ0 | SAS6_HUMAN Spindle assembly abnormal protein 6 homolog OS=Homo sapiens OX=9      | 295,63  | 0,51 |
| 910 | Q6I9Y2 | THOC7_HUMAN THO complex subunit 7 homolog OS=Homo sapiens OX=9606 GN=TH          | 312,27  | 0,51 |
| 911 | Q9Y4C1 | KDM3A_HUMAN Lysine-specific demethylase 3A OS=Homo sapiens OX=9606 GN=KDM        | 306,66  | 0,50 |
| 912 | P01023 | A2MG_HUMAN Alpha-2-macroglobulin OS=Homo sapiens OX=9606 GN=A2M PE=1 SV          | 402,22  | 0,50 |
| 913 | Q92797 | SYMPK_HUMAN Symplekin OS=Homo sapiens OX=9606 GN=SYMPK PE=1 SV=2                 | 219,37  | 0,50 |
| 914 | Q7Z3Y8 | K1C27_HUMAN Keratin_ type I cytoskeletal 27 OS=Homo sapiens OX=9606 GN=KRT27     | 784,74  | 0,49 |
| 915 | O96000 | NDUBA_HUMAN NADH dehydrogenase [ubiquinone] 1 beta subcomplex subunit 10 O       | 185,98  | 0,49 |
| 916 | Q7Z3Z0 | K1C25_HUMAN Keratin_ type I cytoskeletal 25 OS=Homo sapiens OX=9606 GN=KRT25     | 784,74  | 0,49 |
| 917 | P13647 | K2C5_HUMAN Keratin_ type II cytoskeletal 5 OS=Homo sapiens OX=9606 GN=KRT5 PE    | 331,83  | 0,47 |
| 918 | P02788 | TRFL_HUMAN Lactotransferrin OS=Homo sapiens OX=9606 GN=LTF PE=1 SV=6             | 567     | 0,46 |

|     |        |                                                                                  |          |      |
|-----|--------|----------------------------------------------------------------------------------|----------|------|
| 919 | P02771 | FETA_HUMAN Alpha-fetoprotein OS=Homo sapiens OX=9606 GN=AFP PE=1 SV=1            | 309,34   | 0,46 |
| 920 | Q00534 | CDK6_HUMAN Cyclin-dependent kinase 6 OS=Homo sapiens OX=9606 GN=CDK6 PE=1        | 350,35   | 0,46 |
| 921 | P01031 | CO5_HUMAN Complement C5 OS=Homo sapiens OX=9606 GN=C5 PE=1 SV=4                  | 296,79   | 0,45 |
| 922 | Q8N1G1 | REXO1_HUMAN RNA exonuclease 1 homolog OS=Homo sapiens OX=9606 GN=REXO1           | 238,14   | 0,45 |
| 923 | Q9H270 | VPS11_HUMAN Vacuolar protein sorting-associated protein 11 homolog OS=Homo sa    | 274,24   | 0,44 |
| 924 | A7E2Y1 | MYH7B_HUMAN Myosin-7B OS=Homo sapiens OX=9606 GN=MYH7B PE=1 SV=4                 | 265,23   | 0,43 |
| 925 | Q9HC77 | CENPJ_HUMAN Centromere protein J OS=Homo sapiens OX=9606 GN=CENPJ PE=1 SV:       | 316,51   | 0,43 |
| 926 | Q5XKE5 | K2C79_HUMAN Keratin_ type II cytoskeletal 79 OS=Homo sapiens OX=9606 GN=KRT79    | 291,89   | 0,42 |
| 927 | P01024 | CO3_HUMAN Complement C3 OS=Homo sapiens OX=9606 GN=C3 PE=1 SV=2                  | 231,34   | 0,42 |
| 928 | P02774 | VTDB_HUMAN Vitamin D-binding protein OS=Homo sapiens OX=9606 GN=GC PE=1 SV       | 213,16   | 0,42 |
| 929 | Q9Y3B2 | EXOS1_HUMAN Exosome complex component CSL4 OS=Homo sapiens OX=9606 GN=E          | 182,95   | 0,41 |
| 930 | P05543 | THBG_HUMAN Thyroxine-binding globulin OS=Homo sapiens OX=9606 GN=SERPINA7        | 297,73   | 0,41 |
| 931 | Q6VMQ6 | MCAF1_HUMAN Activating transcription factor 7-interacting protein 1 OS=Homo sapi | 408,43   | 0,41 |
| 932 | P20742 | PZP_HUMAN Pregnancy zone protein OS=Homo sapiens OX=9606 GN=PZP PE=1 SV=4        | 332,85   | 0,41 |
| 933 | Q86TB3 | ALPK2_HUMAN Alpha-protein kinase 2 OS=Homo sapiens OX=9606 GN=ALPK2 PE=2 S'      | 300,82   | 0,39 |
| 934 | Q06787 | FMR1_HUMAN Synaptic functional regulator FMR1 OS=Homo sapiens OX=9606 GN=FI      | 352,59   | 0,39 |
| 935 | P78385 | KRT83_HUMAN Keratin_ type II cuticular Hb3 OS=Homo sapiens OX=9606 GN=KRT83 I    | 12974,83 | 0,36 |
| 936 | O43790 | KRT86_HUMAN Keratin_ type II cuticular Hb6 OS=Homo sapiens OX=9606 GN=KRT86 I    | 11767,57 | 0,35 |
| 937 | Q14644 | RASA3_HUMAN Ras GTPase-activating protein 3 OS=Homo sapiens OX=9606 GN=RAS/      | 400,48   | 0,35 |
| 938 | P19823 | ITIH2_HUMAN Inter-alpha-trypsin inhibitor heavy chain H2 OS=Homo sapiens OX=960  | 358,43   | 0,34 |
| 939 | Q9BRP8 | PYM1_HUMAN Partner of Y14 and mago OS=Homo sapiens OX=9606 GN=PYM1 PE=1          | 307,4    | 0,29 |
| 940 | Q8IYF3 | TEX11_HUMAN Testis-expressed protein 11 OS=Homo sapiens OX=9606 GN=TEX11 PE      | 359,52   | 0,29 |
| 941 | O94892 | ZN432_HUMAN Zinc finger protein 432 OS=Homo sapiens OX=9606 GN=ZNF432 PE=1       | 310,53   | 0,24 |
| 942 | P10244 | MYBB_HUMAN Myb-related protein B OS=Homo sapiens OX=9606 GN=MYBL2 PE=1 S'        | 394,3    | 0,15 |
| 943 | Q14624 | ITIH4_HUMAN Inter-alpha-trypsin inhibitor heavy chain H4 OS=Homo sapiens OX=960  | 612,31   | 0,1  |
| 944 | Q14980 | NUMA1_HUMAN Nuclear mitotic apparatus protein 1 OS=Homo sapiens OX=9606 GN       | 123,61   | 0,1  |
| 945 | Q9Y6N1 | COX11_HUMAN Cytochrome c oxidase assembly protein COX11_ mitochondrial OS=H      | 213,6    | 0,1  |
| 946 | P24522 | GA45A_HUMAN Growth arrest and DNA damage-inducible protein GADD45 alpha OS=      | 254,17   | 0,1  |
| 947 | P54198 | HIRA_HUMAN Protein HIRA OS=Homo sapiens OX=9606 GN=HIRA PE=1 SV=2                | 351,55   | 0,1  |
| 948 | P12273 | PIP_HUMAN Prolactin-inducible protein OS=Homo sapiens OX=9606 GN=PIP PE=1 SV=    | 2085,32  | 0,1  |
| 949 | Q2TB90 | HKDC1_HUMAN Putative hexokinase HKDC1 OS=Homo sapiens OX=9606 GN=HKDC1 F         | 248,3    | 0,1  |

|     |            |                                                                                |         |     |
|-----|------------|--------------------------------------------------------------------------------|---------|-----|
| 950 | Q9Y6K9     | NEMO_HUMAN NF-kappa-B essential modulator OS=Homo sapiens OX=9606 GN=IKBK      | 289,33  | 0,1 |
| 951 | Q12768     | WASC5_HUMAN WASH complex subunit 5 OS=Homo sapiens OX=9606 GN=WASHC5 F         | 190,66  | 0,1 |
| 952 | Q9Y3B7     | RM11_HUMAN 39S ribosomal protein L11_ mitochondrial OS=Homo sapiens OX=9606    | 280,2   | 0,1 |
| 953 | Q17R98     | ZN827_HUMAN Zinc finger protein 827 OS=Homo sapiens OX=9606 GN=ZNF827 PE=1     | 267,26  | 0,1 |
| 954 | Q7Z5M8     | AB12B_HUMAN Protein ABHD12B OS=Homo sapiens OX=9606 GN=ABHD12B PE=2 SV:        | 773,78  | 0,1 |
| 955 | Q86T90     | K1328_HUMAN Protein hinderin OS=Homo sapiens OX=9606 GN=KIAA1328 PE=1 SV:      | 219,12  | 0,1 |
| 956 | P0C7H8     | KRA23_HUMAN Keratin-associated protein 2-3 OS=Homo sapiens OX=9606 GN=KRTAF    | 6903,6  | 0,1 |
| 957 | Q9BYU5     | KRA21_HUMAN Keratin-associated protein 2-1 OS=Homo sapiens OX=9606 GN=KRTAF    | 6903,6  | 0,1 |
| 958 | P40938     | RFC3_HUMAN Replication factor C subunit 3 OS=Homo sapiens OX=9606 GN=RFC3 PE   | 284,39  | 0,1 |
| 959 | Q8IYB8     | SUV3_HUMAN ATP-dependent RNA helicase SUPV3L1_ mitochondrial OS=Homo sapie     | 363,48  | 0,1 |
| 960 | Q9BYT5     | KRA22_HUMAN Keratin-associated protein 2-2 OS=Homo sapiens OX=9606 GN=KRTAF    | 6903,6  | 0,1 |
| 961 | O14561     | ACPM_HUMAN Acyl carrier protein_ mitochondrial OS=Homo sapiens OX=9606 GN=N    | 236,68  | 0,1 |
| 962 | Q92187     | SIA8D_HUMAN CMP-N-acetylneuraminate-poly-alpha-2_8-sialyltransferase OS=Homo   | 254,19  | 0,1 |
| 963 | Q9BYR9     | KRA24_HUMAN Keratin-associated protein 2-4 OS=Homo sapiens OX=9606 GN=KRTAF    | 6903,6  | 0,1 |
| 964 | Q9UHR6     | ZNHI2_HUMAN Zinc finger HIT domain-containing protein 2 OS=Homo sapiens OX=960 | 172,45  | 0,1 |
| 965 | P01008     | ANT3_HUMAN Antithrombin-III OS=Homo sapiens OX=9606 GN=SERPINC1 PE=1 SV=1      | 294,1   | 0,1 |
| 966 | Q53GS7     | GLE1_HUMAN Nucleoporin GLE1 OS=Homo sapiens OX=9606 GN=GLE1 PE=1 SV=2          | 260,65  | 0,1 |
| 967 | Q7L523     | RRAGA_HUMAN Ras-related GTP-binding protein A OS=Homo sapiens OX=9606 GN=R     | 911,03  | 0,1 |
| 968 | Q02952     | AKA12_HUMAN A-kinase anchor protein 12 OS=Homo sapiens OX=9606 GN=AKAP12 F     | 116,89  | 0,1 |
| 969 | P53680     | AP2S1_HUMAN AP-2 complex subunit sigma OS=Homo sapiens OX=9606 GN=AP2S1 P      | 454,42  | 0,1 |
| 970 | O14863     | ZNT4_HUMAN Zinc transporter 4 OS=Homo sapiens OX=9606 GN=SLC30A4 PE=1 SV=2     | 261,95  | 0,1 |
| 971 | Q9UL25     | RAB21_HUMAN Ras-related protein Rab-21 OS=Homo sapiens OX=9606 GN=RAB21 PE     | 275,87  | 0,1 |
| 972 | P10632     | CP2C8_HUMAN Cytochrome P450 2C8 OS=Homo sapiens OX=9606 GN=CYP2C8 PE=1 S       | 226,56  | 0,1 |
| 973 | Q9Y2R4     | DDX52_HUMAN Probable ATP-dependent RNA helicase DDX52 OS=Homo sapiens OX=      | 120,8   | 0,1 |
| 974 | O95399     | UTS2_HUMAN Urotensin-2 OS=Homo sapiens OX=9606 GN=UTS2 PE=1 SV=1               | 288,18  | 0,1 |
| 975 | Q6NY19     | KANK3_HUMAN KN motif and ankyrin repeat domain-containing protein 3 OS=Homo s  | 251,73  | 0,1 |
| 976 | O95394     | AGM1_HUMAN Phosphoacetylglucosamine mutase OS=Homo sapiens OX=9606 GN=P        | 251,65  | 0,1 |
| 977 | A0A0A0MS15 | HV349_HUMAN Immunoglobulin heavy variable 3-49 OS=Homo sapiens OX=9606 GN=     | 651,78  | 0,1 |
| 978 | Q13163     | MP2K5_HUMAN Dual specificity mitogen-activated protein kinase kinase 5 OS=Homo | 426,76  | 0,1 |
| 979 | A6NCN2     | KR87P_HUMAN Putative keratin-87 protein OS=Homo sapiens OX=9606 GN=KRT87P P    | 9276,97 | 0,1 |
| 980 | Q9Y5T5     | UBP16_HUMAN Ubiquitin carboxyl-terminal hydrolase 16 OS=Homo sapiens OX=9606   | 268,51  | 0,1 |



|      |            |                                                                                     |         |     |
|------|------------|-------------------------------------------------------------------------------------|---------|-----|
| 981  | P08697     | A2AP_HUMAN Alpha-2-antiplasmin OS=Homo sapiens OX=9606 GN=SERPINF2 PE=1 S'          | 492,04  | 0,1 |
| 982  | P18754     | RCC1_HUMAN Regulator of chromosome condensation OS=Homo sapiens OX=9606 G           | 326,22  | 0,1 |
| 983  | Q5CZ79     | AN20B_HUMAN Ankyrin repeat domain-containing protein 20B OS=Homo sapiens OX:        | 278,03  | 0,1 |
| 984  | Q15643     | TRIPB_HUMAN Thyroid receptor-interacting protein 11 OS=Homo sapiens OX=9606 GI      | 218,46  | 0,1 |
| 985  | Q96DA0     | ZG16B_HUMAN Zymogen granule protein 16 homolog B OS=Homo sapiens OX=9606 C          | 2335,05 | 0,1 |
| 986  | P10915     | HPLN1_HUMAN Hyaluronan and proteoglycan link protein 1 OS=Homo sapiens OX=96        | 223,65  | 0,1 |
| 987  | P10911     | MCF2_HUMAN Proto-oncogene DBL OS=Homo sapiens OX=9606 GN=MCF2 PE=1 SV=3             | 164,7   | 0,1 |
| 988  | Q9BRT9     | SLD5_HUMAN DNA replication complex GINS protein SLD5 OS=Homo sapiens OX=960         | 400,86  | 0,1 |
| 989  | P00846     | ATP6_HUMAN ATP synthase subunit a OS=Homo sapiens OX=9606 GN=MT-ATP6 PE=1           | 248,38  | 0,1 |
| 990  | Q6PML9     | ZNT9_HUMAN Zinc transporter 9 OS=Homo sapiens OX=9606 GN=SLC30A9 PE=1 SV=1          | 219,88  | 0,1 |
| 991  | Q8IUG1     | KRA13_HUMAN Keratin-associated protein 1-3 OS=Homo sapiens OX=9606 GN=KRTA          | 223,02  | 0,1 |
| 992  | Q8IUE1     | TF2LX_HUMAN Homeobox protein TGIF2LX OS=Homo sapiens OX=9606 GN=TGIF2LX F           | 294,73  | 0,1 |
| 993  | Q8IUE0     | TF2LY_HUMAN Homeobox protein TGIF2LY OS=Homo sapiens OX=9606 GN=TGIF2LY F           | 294,73  | 0,1 |
| 994  | Q13769     | THOC5_HUMAN THO complex subunit 5 homolog OS=Homo sapiens OX=9606 GN=THO            | 232,67  | 0,1 |
| 995  | Q8IUC1     | KR111_HUMAN Keratin-associated protein 11-1 OS=Homo sapiens OX=9606 GN=KRTA         | 2933,07 | 0,1 |
| 996  | Q96JE7     | SC16B_HUMAN Protein transport protein Sec16B OS=Homo sapiens OX=9606 GN=SEC         | 270,93  | 0,1 |
| 997  | O15247     | CLIC2_HUMAN Chloride intracellular channel protein 2 OS=Homo sapiens OX=9606 GN     | 327,31  | 0,1 |
| 998  | Q12996     | CSTF3_HUMAN Cleavage stimulation factor subunit 3 OS=Homo sapiens OX=9606 GN=       | 264,58  | 0,1 |
| 999  | P49747     | COMP_HUMAN Cartilage oligomeric matrix protein OS=Homo sapiens OX=9606 GN=C         | 222,02  | 0,1 |
| 1000 | Q96CN5     | LRC45_HUMAN Leucine-rich repeat-containing protein 45 OS=Homo sapiens OX=9606       | 231,85  | 0,1 |
| 1001 | A0A1B0GTD5 | TEX49_HUMAN Testis-expressed protein 49 OS=Homo sapiens OX=9606 GN=TEX49 PE         | 357,29  | 0,1 |
| 1002 | Q9Y262     | EIF3L_HUMAN Eukaryotic translation initiation factor 3 subunit L OS=Homo sapiens O) | 207,56  | 0,1 |
| 1003 | Q70EK9     | UBP51_HUMAN Ubiquitin carboxyl-terminal hydrolase 51 OS=Homo sapiens OX=9606        | 277,34  | 0,1 |
| 1004 | Q9C075     | K1C23_HUMAN Keratin_ type I cytoskeletal 23 OS=Homo sapiens OX=9606 GN=KRT23        | 447,89  | 0,1 |
| 1005 | Q96M91     | CFA53_HUMAN Cilia- and flagella-associated protein 53 OS=Homo sapiens OX=9606 G     | 222,5   | 0,1 |
| 1006 | P45985     | MP2K4_HUMAN Dual specificity mitogen-activated protein kinase kinase 4 OS=Homo      | 268,51  | 0,1 |
| 1007 | O95267     | GRP1_HUMAN RAS guanyl-releasing protein 1 OS=Homo sapiens OX=9606 GN=RASGR          | 363,83  | 0,1 |
| 1008 | P24390     | ERD21_HUMAN ER lumen protein-retaining receptor 1 OS=Homo sapiens OX=9606 GN        | 164,2   | 0,1 |
| 1009 | P01877     | IGHA2_HUMAN Immunoglobulin heavy constant alpha 2 OS=Homo sapiens OX=9606 C         | 316,31  | 0,1 |
| 1010 | P01876     | IGHA1_HUMAN Immunoglobulin heavy constant alpha 1 OS=Homo sapiens OX=9606 C         | 518,46  | 0,1 |
| 1011 | Q9C029     | TRIM7_HUMAN E3 ubiquitin-protein ligase TRIM7 OS=Homo sapiens OX=9606 GN=TR         | 175,5   | 0,1 |

|      |        |                                                                              |         |     |
|------|--------|------------------------------------------------------------------------------|---------|-----|
| 1012 | Q86XQ3 | CTSR3_HUMAN Cation channel sperm-associated protein 3 OS=Homo sapiens OX=960 | 434,34  | 0,1 |
| 1013 | Q5T2T1 | MPP7_HUMAN MAGUK p55 subfamily member 7 OS=Homo sapiens OX=9606 GN=MP        | 268,51  | 0,1 |
| 1014 | P30085 | KCY_HUMAN UMP-CMP kinase OS=Homo sapiens OX=9606 GN=CMCK1 PE=1 SV=3          | 219,82  | 0,1 |
| 1015 | P41223 | BUD31_HUMAN Protein BUD31 homolog OS=Homo sapiens OX=9606 GN=BUD31 PE=:      | 257,77  | 0,1 |
| 1016 | P01834 | IGKC_HUMAN Immunoglobulin kappa constant OS=Homo sapiens OX=9606 GN=IGKC     | 568,39  | 0,1 |
| 1017 | Q07627 | KRA11_HUMAN Keratin-associated protein 1-1 OS=Homo sapiens OX=9606 GN=KRTAF  | 223,02  | 0,1 |
| 1018 | Q86UF4 | CC190_HUMAN Coiled-coil domain-containing protein 190 OS=Homo sapiens OX=960 | 200,86  | 0,1 |
| 1019 | P49006 | MRP_HUMAN MARCKS-related protein OS=Homo sapiens OX=9606 GN=MARCKSL1 PE      | 348,04  | 0,1 |
| 1020 | A6NI15 | MSGN1_HUMAN Mesogenin-1 OS=Homo sapiens OX=9606 GN=MSGN1 PE=3 SV=1           | 441,92  | 0,1 |
| 1021 | Q2T9L4 | CO059_HUMAN UPF0583 protein C15orf59 OS=Homo sapiens OX=9606 GN=C15orf59     | 301,81  | 0,1 |
| 1022 | Q6ZRS4 | CC129_HUMAN Coiled-coil domain-containing protein 129 OS=Homo sapiens OX=960 | 356,08  | 0,1 |
| 1023 | P33991 | MCM4_HUMAN DNA replication licensing factor MCM4 OS=Homo sapiens OX=9606 G   | 208,96  | 0,1 |
| 1024 | P06681 | CO2_HUMAN Complement C2 OS=Homo sapiens OX=9606 GN=C2 PE=1 SV=2              | 174,3   | 0,1 |
| 1025 | P60903 | S10AA_HUMAN Protein S100-A10 OS=Homo sapiens OX=9606 GN=S100A10 PE=1 SV=     | 321,6   | 0,1 |
| 1026 | Q9H7D0 | DOCK5_HUMAN Dedicator of cytokinesis protein 5 OS=Homo sapiens OX=9606 GN=DO | 194,32  | 0,1 |
| 1027 | P33947 | ERD22_HUMAN ER lumen protein-retaining receptor 2 OS=Homo sapiens OX=9606 GN | 199,34  | 0,1 |
| 1028 | Q6ZUS5 | CC121_HUMAN Coiled-coil domain-containing protein 121 OS=Homo sapiens OX=960 | 351,01  | 0,1 |
| 1029 | P0DOX7 | IGK_HUMAN Immunoglobulin kappa light chain OS=Homo sapiens OX=9606 PE=1 SV=: | 478,7   | 0,1 |
| 1030 | P0DOX2 | IGA2_HUMAN Immunoglobulin alpha-2 heavy chain OS=Homo sapiens OX=9606 PE=1   | 316,31  | 0,1 |
| 1031 | Q95816 | BAG2_HUMAN BAG family molecular chaperone regulator 2 OS=Homo sapiens OX=96  | 183,54  | 0,1 |
| 1032 | Q5VZM2 | RRAGB_HUMAN Ras-related GTP-binding protein B OS=Homo sapiens OX=9606 GN=RI  | 944,45  | 0,1 |
| 1033 | Q9NSB4 | KRT82_HUMAN Keratin_ type II cuticular Hb2 OS=Homo sapiens OX=9606 GN=KRT82  | 5167,44 | 0,1 |
| 1034 | Q08050 | FOXM1_HUMAN Forkhead box protein M1 OS=Homo sapiens OX=9606 GN=FOXM1 PE      | 170,41  | 0,1 |
| 1035 | Q8NHP7 | EXD1_HUMAN piRNA biogenesis protein EXD1 OS=Homo sapiens OX=9606 GN=EXD1 F   | 322,48  | 0,1 |
| 1036 | Q6A162 | K1C40_HUMAN Keratin_ type I cytoskeletal 40 OS=Homo sapiens OX=9606 GN=KRT40 | 2466,55 | 0,1 |
| 1037 | Q96HW7 | INT4_HUMAN Integrator complex subunit 4 OS=Homo sapiens OX=9606 GN=INTS4 PE  | 111,65  | 0,1 |
| 1038 | Q9BTFO | THUM2_HUMAN THUMP domain-containing protein 2 OS=Homo sapiens OX=9606 GN     | 240,49  | 0,1 |
| 1039 | P49913 | CAMP_HUMAN Cathelicidin antimicrobial peptide OS=Homo sapiens OX=9606 GN=CA  | 209,47  | 0,1 |
| 1040 | Q9Y3Z3 | SAMH1_HUMAN Deoxynucleoside triphosphate triphosphohydrolase SAMHD1 OS=Ho    | 403,05  | 0,1 |
| 1041 | Q9NP55 | BPIA1_HUMAN BPI fold-containing family A member 1 OS=Homo sapiens OX=9606 GN | 413,26  | 0,1 |
| 1042 | P28324 | ELK4_HUMAN ETS domain-containing protein Elk-4 OS=Homo sapiens OX=9606 GN=EI | 222,5   | 0,1 |

|      |        |                                                                                  |         |     |
|------|--------|----------------------------------------------------------------------------------|---------|-----|
| 1043 | Q68DU8 | KCD16_HUMAN BTB/POZ domain-containing protein KCTD16 OS=Homo sapiens OX=9        | 221,12  | 0,1 |
| 1044 | Q96RF0 | SNX18_HUMAN Sorting nexin-18 OS=Homo sapiens OX=9606 GN=SNX18 PE=1 SV=2          | 222,5   | 0,1 |
| 1045 | Q8TDL5 | BPIB1_HUMAN BPI fold-containing family B member 1 OS=Homo sapiens OX=9606 GN     | 1257,25 | 0,1 |
| 1046 | O75915 | PRAF3_HUMAN PRA1 family protein 3 OS=Homo sapiens OX=9606 GN=ARL6IP5 PE=1        | 201,46  | 0,1 |
| 1047 | Q9H6R3 | ACSS3_HUMAN Acyl-CoA synthetase short-chain family member 3_ mitochondrial OS=   | 250,77  | 0,1 |
| 1048 | P59047 | NALP5_HUMAN NACHT_ LRR and PYD domains-containing protein 5 OS=Homo sapien       | 280,1   | 0,1 |
| 1049 | O43174 | CP26A_HUMAN Cytochrome P450 26A1 OS=Homo sapiens OX=9606 GN=CYP26A1 PE=          | 235,25  | 0,1 |
| 1050 | P33260 | CP2C1_HUMAN Cytochrome P450 2C18 OS=Homo sapiens OX=9606 GN=CYP2C18 PE=          | 233,45  | 0,1 |
| 1051 | Q16548 | B2LA1_HUMAN Bcl-2-related protein A1 OS=Homo sapiens OX=9606 GN=BCL2A1 PE=       | 451,5   | 0,1 |
| 1052 | A2RTY3 | HEAT9_HUMAN Protein HEATR9 OS=Homo sapiens OX=9606 GN=HEATR9 PE=1 SV=2           | 197,13  | 0,1 |
| 1053 | O43169 | CYB5B_HUMAN Cytochrome b5 type B OS=Homo sapiens OX=9606 GN=CYB5B PE=1 S'        | 219,94  | 0,1 |
| 1054 | P61626 | LYSC_HUMAN Lysozyme C OS=Homo sapiens OX=9606 GN=LYZ PE=1 SV=1                   | 5660,62 | 0,1 |
| 1055 | Q5JQS6 | GSAML_HUMAN Germinal center-associated signaling and motility-like protein OS=Ho | 191,65  | 0,1 |
| 1056 | P78412 | IRX6_HUMAN Iroquois-class homeodomain protein IRX-6 OS=Homo sapiens OX=9606      | 243,83  | 0,1 |
| 1057 | Q92526 | TCPW_HUMAN T-complex protein 1 subunit zeta-2 OS=Homo sapiens OX=9606 GN=Ci      | 241,31  | 0,1 |
| 1058 | P02808 | STAT_HUMAN Statherin OS=Homo sapiens OX=9606 GN=STATH PE=1 SV=2                  | 3694,5  | 0,1 |
| 1059 | P23142 | FBLN1_HUMAN Fibulin-1 OS=Homo sapiens OX=9606 GN=FBLN1 PE=1 SV=4                 | 237,66  | 0,1 |
| 1060 | O15091 | MRPP3_HUMAN Mitochondrial ribonuclease P catalytic subunit OS=Homo sapiens OX=   | 400,86  | 0,1 |
| 1061 | Q8NDX1 | PSD4_HUMAN PH and SEC7 domain-containing protein 4 OS=Homo sapiens OX=9606       | 170,19  | 0,1 |
| 1062 | O95445 | APOM_HUMAN Apolipoprotein M OS=Homo sapiens OX=9606 GN=APOM PE=1 SV=2            | 252,66  | 0,1 |
| 1063 | Q9BT78 | CSN4_HUMAN COP9 signalosome complex subunit 4 OS=Homo sapiens OX=9606 GN=        | 205,17  | 0,1 |
| 1064 | Q8TDB6 | DTX3L_HUMAN E3 ubiquitin-protein ligase DTX3L OS=Homo sapiens OX=9606 GN=DT      | 290,12  | 0,1 |
| 1065 | O60318 | GANP_HUMAN Germinal-center associated nuclear protein OS=Homo sapiens OX=960     | 225,2   | 0,1 |
| 1066 | O76011 | KRT34_HUMAN Keratin_ type I cuticular Ha4 OS=Homo sapiens OX=9606 GN=KRT34 P     | 4891,75 | 0,1 |
| 1067 | O76009 | KT33A_HUMAN Keratin_ type I cuticular Ha3-I OS=Homo sapiens OX=9606 GN=KRT33.    | 6496,27 | 0,1 |
